# Supplementary material for: Computational Insights on the Mechanism of the Chemiluminescence Reaction of New Group of Chemiluminogens—10-Methyl-9-thiophenoxycarbonylacridinium Cations
Source: PubMed Central journal article supplement (PMC7420290; doi:10.3390/ijms21124417), 2020-06-21

## **Supplementary Materials**

# **Computational Insights on the Mechanism of the Chemiluminescence Reaction of New Group of Chemiluminogens – 10-Methyl-9- thiophenoxycarbonylacridinium Cations**

**Milena Pieńkos and Beata Zadykowicz\***

*Faculty of Chemistry, University of Gdańsk, Wita Stwosza 63, 80-308 Gdańsk, Poland*

*\*Correspondence: [beata.zadykowicz@ug.edu.pl](mailto:beata.zadykowicz@ug.edu.pl)*

**Scheme S1.** Pathways of the reactions of ATE with  $\text{OOH}^-$  and  $\text{OH}^-$  (CL pathway (green arrows), non-CL pathways: transformation of ATE to the non-emitting product (blue arrows) and hydrolysis of ATE (orange arrows)).

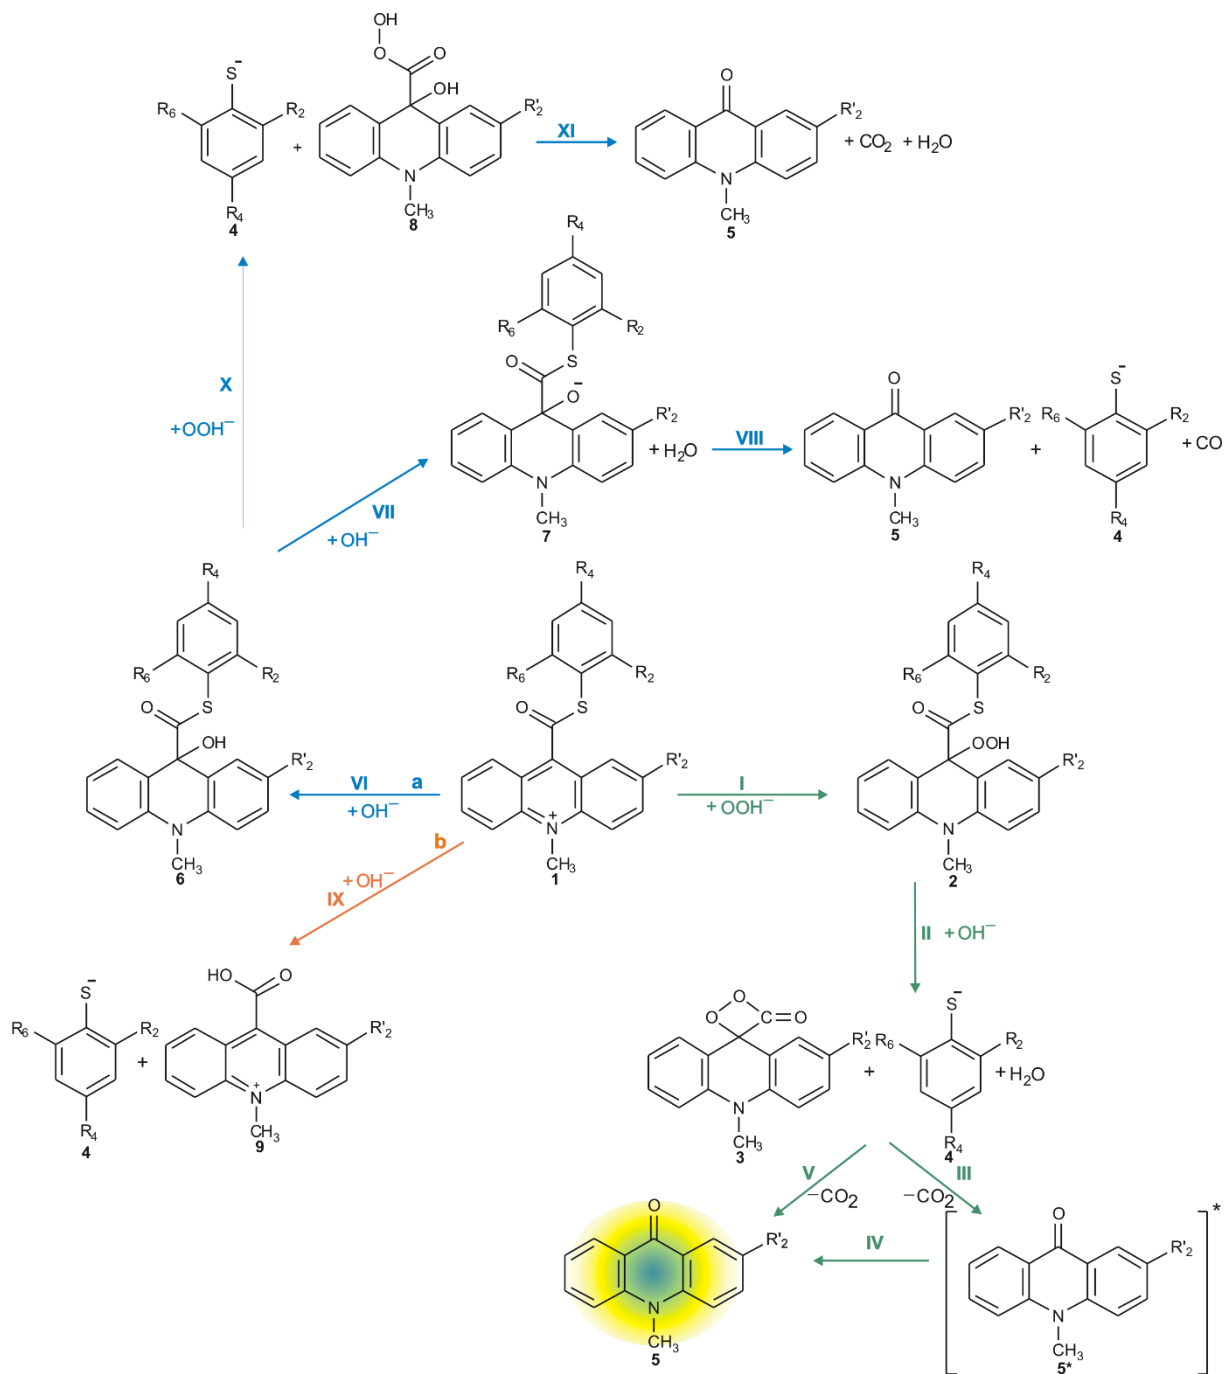

**Table S1.** The calculated Mulliken atomic charges and LCAO coefficient of the p<sub>z</sub> LUMO orbital at the endocyclic C9 and the carbonyl C15 atoms.

| Distribution charges |      |                     |         |                                        |         |
|----------------------|------|---------------------|---------|----------------------------------------|---------|
| Compound             | atom | Mulliken population |         | p <sub>z</sub> LUMO                    |         |
|                      |      | C9                  | C15     | C9                                     | C15     |
| a                    |      | 0.08203             | 0.15337 | 0.31536                                | 0.02752 |
| b                    |      | 0.07367             | 0.15911 | 0.31483                                | 0.02922 |
| c                    |      | 0.08186             | 0.15316 | 0.31051                                | 0.02844 |
| d                    |      | 0.07880             | 0.14881 | 0.29330                                | 0.02792 |
| e                    |      | 0.07246             | 0.16747 | 0.31103                                | 0.02353 |
| f                    |      | 0.07734             | 0.15280 | 0.31551                                | 0.03508 |
| g                    |      | 0.06877             | 0.15230 | 0.31847                                | 0.02548 |
| h                    |      | 0.07893             | 0.15328 | 0.30948                                | 0.03537 |
| i                    |      | 0.07028             | 0.15414 | 0.30883                                | 0.03460 |
| j                    |      | 0.06231             | 0.16334 | 0.30767                                | 0.03941 |
| k                    |      | 0.07044             | 0.15451 | 0.30670                                | 0.03618 |
| l                    |      | 0.06614             | 0.14913 | 0.29821                                | 0.03732 |
|                      | AVE  | 0.074               | 0.155   | 0.309                                  | 0.032   |
|                      |      |                     |         | $\frac{0.309}{0.032} = 9,8$ ratio≈1:10 |         |

**Figure S1.** and **Table S2.** The VDD population analysis results of the investigated dioxetanone molecules (a) unsubstituted and (b) substituted in the acridine moiety.

Results of the VDD population analysis, at the PCM-B3LYP/6-31G (d, p) level of theory, for all dioxetanones

|   |                 |                 |                 |                 |
|---|-----------------|-----------------|-----------------|-----------------|
| a | O <sub>29</sub> | O <sub>30</sub> | C <sub>11</sub> | C <sub>15</sub> |
|   | -0,088273       | -0,120393       | 0,199079        | 0,05318         |
| b | O <sub>16</sub> | O <sub>17</sub> | C <sub>10</sub> | C <sub>15</sub> |
|   | -0,0918         | -0,1227         | 0,0516          | 0,1991          |

$\nabla^2\rho(r)$ ,  $\rho(r)$ ,  $\epsilon$ , and  $-(G(r_b)/V(r_b))$  values for the C<sub>15</sub>-C<sub>11</sub>, O<sub>29</sub>-O<sub>30</sub>, C<sub>10</sub>-C<sub>15</sub>, O<sub>16</sub>-O<sub>17</sub> BCP, for all dioxetanones

| a | bonds                            | $\nabla^2\rho(r)$ | $\rho(r)$ | $\epsilon$ | $-(G(r_b)/V(r_b))$ |
|---|----------------------------------|-------------------|-----------|------------|--------------------|
|   | C <sub>15</sub> -C <sub>11</sub> | -0,6277           | 0,2584    | 0,085475   | 0,2141             |
|   | O <sub>29</sub> -O <sub>30</sub> | 0,0137            | 0,2561    | 0,110024   | 0,5043             |
| b | C <sub>10</sub> -C <sub>15</sub> | -0,6248           | 0,2579    | 0,0852     | 0,2147             |
|   | O <sub>16</sub> -O <sub>17</sub> | 0,0157            | 0,2555    | 0,1094     | 0,5052             |

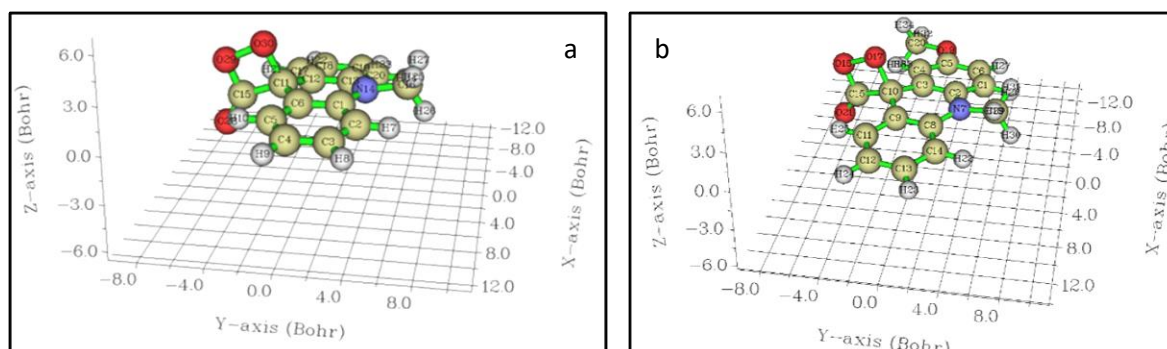

**Figure S2.** Relative Gibbs free energies of the CL pathway (reaction steps: I–IV) and non-CL step VI (formation of pseudobase) of acridinium thioesters: (a, black) and acridinium esters (c, violet).

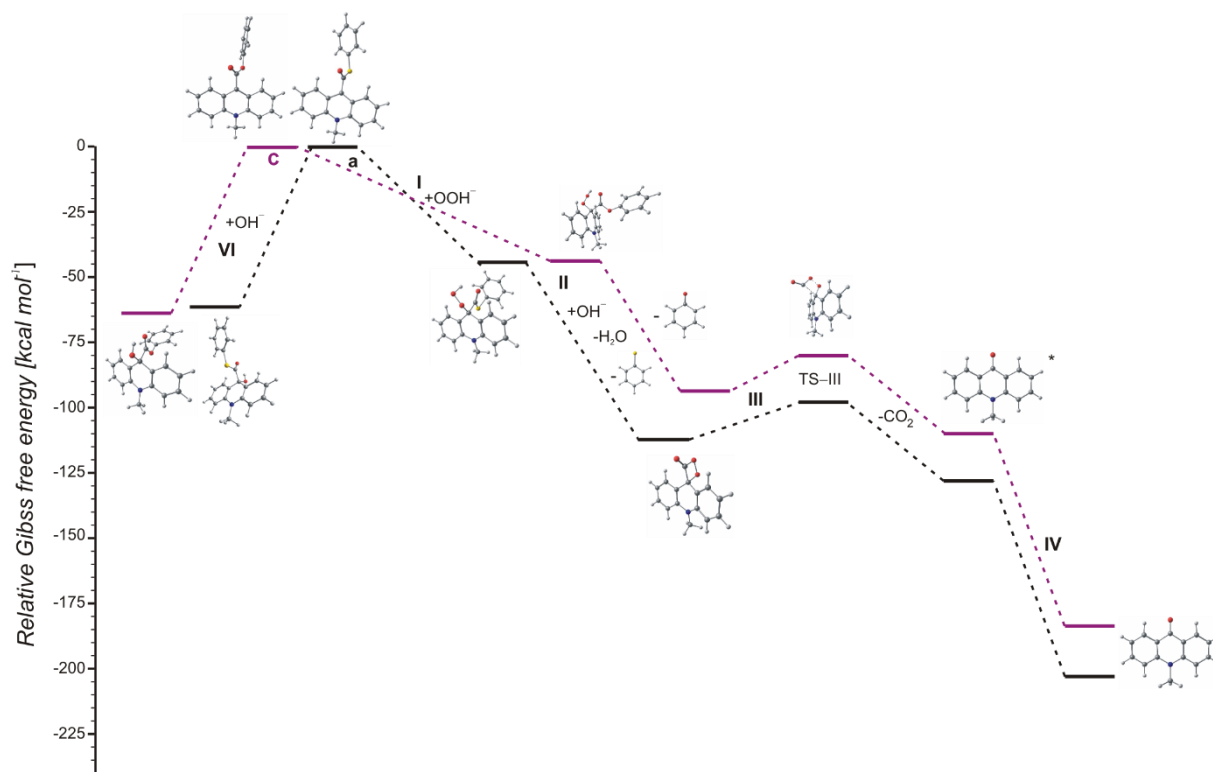

**Figure S3.** Energy diagram of the chemiluminescence reaction in the gaseous phase with energy of the lowest triplet ( $T_1$ ) and singlet ( $S_1$ ) states.

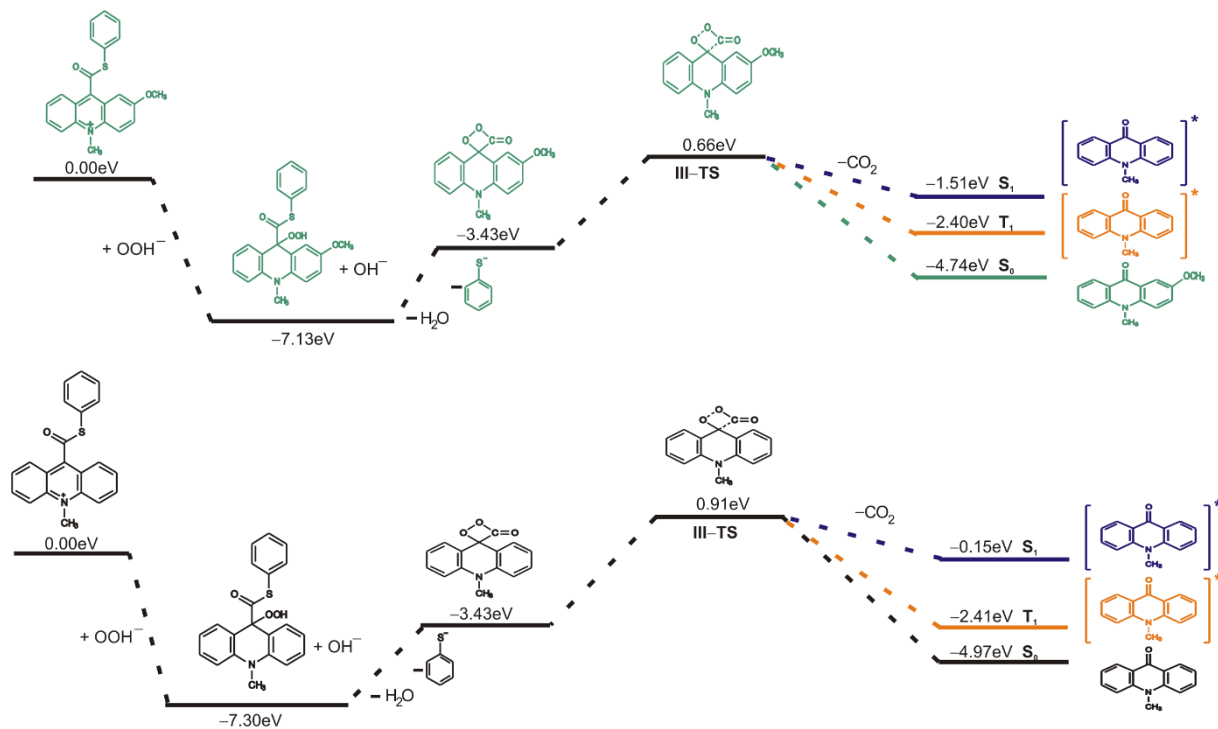

**Table S3.** Cartesian coordinates and structures of the lowest energy and transition state structures of investigated molecules. list of abbreviations: \* – excited product resp.  $S_1$  – first singlet state,  $T_1$  – first triplet state; TS – the number corresponding to the reaction steps

| R <sub>2</sub> =H, R <sub>4</sub> =H, R <sub>6</sub> =H, R <sub>2'</sub> =H |              |              |              |
|-----------------------------------------------------------------------------|--------------|--------------|--------------|
| Geom.No                                                                     |              |              |              |
| 1 = -1337.85539377 Ha                                                       |              |              |              |
| Atom                                                                        | X            | Y            | Z            |
| C                                                                           | 0.000005141  | 0.000002460  | 0.000001020  |
| C                                                                           | -0.000001929 | -0.000000641 | -0.000002190 |
| C                                                                           | -0.000000882 | -0.000000015 | 0.000000137  |
| C                                                                           | -0.000002944 | 0.000000564  | 0.000000982  |
| C                                                                           | -0.000000450 | 0.000000787  | 0.000000546  |
| C                                                                           | -0.000006599 | -0.000001125 | 0.000000626  |
| H                                                                           | -0.000001101 | -0.000000764 | -0.000000570 |
| H                                                                           | -0.000003055 | -0.000000329 | -0.000000539 |
| H                                                                           | -0.000002269 | 0.000000477  | 0.000000491  |
| H                                                                           | -0.000001364 | 0.000000259  | 0.000001420  |
| C                                                                           | 0.000015223  | 0.000003447  | -0.000002034 |
| C                                                                           | -0.000006863 | -0.000001665 | -0.000003759 |
| C                                                                           | 0.000002233  | -0.000001880 | -0.000007022 |
| N                                                                           | -0.000010991 | -0.000001081 | 0.000003348  |
| C                                                                           | -0.000000290 | -0.000023107 | 0.000012694  |
| C                                                                           | 0.000006699  | -0.000000984 | -0.000005459 |
| C                                                                           | 0.000002648  | 0.000000434  | 0.000001377  |
| C                                                                           | -0.000002471 | -0.000000404 | -0.000001200 |
| C                                                                           | 0.000003016  | 0.000000107  | -0.000005104 |
| C                                                                           | 0.000000511  | 0.000000735  | -0.000000122 |
| H                                                                           | -0.000000536 | -0.000001113 | -0.000000996 |
| H                                                                           | 0.000002534  | -0.000000481 | -0.000001382 |
| H                                                                           | 0.000001336  | -0.000000122 | -0.000002317 |
| H                                                                           | 0.000000205  | 0.000000181  | -0.000002588 |
| H                                                                           | -0.000003441 | 0.000000191  | -0.000002211 |
| H                                                                           | -0.000002329 | -0.000000399 | -0.000002776 |
| H                                                                           | -0.000001837 | -0.000000398 | -0.000002815 |
| S                                                                           | -0.000022514 | 0.000012014  | 0.000016851  |
| O                                                                           | 0.000005964  | 0.000007881  | -0.000005402 |
| C                                                                           | 0.000012771  | -0.000001242 | -0.000019809 |
| C                                                                           | -0.000000008 | -0.000000720 | 0.000004706  |
| C                                                                           | 0.000003825  | 0.000002531  | 0.000001326  |
| C                                                                           | 0.000001526  | -0.000003067 | 0.000001882  |
| C                                                                           | -0.000001553 | 0.000003212  | 0.000005885  |
| C                                                                           | 0.000004465  | 0.000002102  | 0.000001651  |
| H                                                                           | 0.000001483  | 0.000000470  | 0.000001213  |
| H                                                                           | 0.000001996  | 0.000000082  | 0.000002515  |
| H                                                                           | 0.000002023  | 0.000000448  | 0.000003416  |
| H                                                                           | 0.000001205  | 0.000000200  | 0.000002894  |
| H                                                                           | -0.000001377 | 0.000000949  | 0.000003315  |

**Geom. No**  
**2 = -1489.01584057 Ha**

| Atom | X            | Y            | Z            |
|------|--------------|--------------|--------------|
| C    | -0.000000045 | -0.000000727 | -0.000000761 |
| C    | -0.000003028 | 0.000004438  | -0.000004578 |
| C    | -0.000001480 | 0.000000451  | 0.000000408  |
| C    | 0.000000890  | 0.000001176  | -0.000000488 |
| C    | -0.000000935 | 0.000001581  | 0.000000208  |
| C    | -0.000001223 | 0.000000875  | -0.000000154 |
| S    | 0.000000001  | -0.000007132 | 0.000003455  |
| C    | -0.000000795 | 0.000011861  | 0.000000446  |
| O    | 0.000002794  | -0.000004366 | -0.000002700 |
| C    | 0.000001057  | 0.000006862  | -0.000001836 |
| C    | -0.000000744 | -0.000003940 | -0.000000333 |
| C    | -0.000000662 | 0.000000094  | -0.000002026 |
| N    | -0.000004089 | 0.000000872  | 0.000005389  |
| C    | 0.000001627  | -0.000004223 | -0.000005614 |
| C    | 0.000005551  | 0.000000190  | 0.000004100  |
| C    | 0.000002626  | -0.000000078 | 0.000002229  |
| C    | -0.000001237 | 0.000000587  | 0.000000300  |
| C    | -0.000000008 | -0.000001596 | -0.000002198 |
| C    | 0.000002147  | 0.000001512  | 0.000003890  |
| C    | -0.000002337 | -0.000001549 | -0.000001283 |
| C    | -0.000001505 | 0.000000906  | 0.000001310  |
| C    | 0.000002583  | -0.000001493 | 0.000001718  |
| C    | -0.000002798 | -0.000000445 | -0.000003174 |
| O    | 0.000005870  | -0.000008149 | 0.000003827  |
| O    | -0.000003565 | 0.000004145  | -0.000002323 |
| C    | 0.000002235  | -0.000001201 | -0.000001163 |
| H    | 0.000000372  | -0.000001354 | 0.000001397  |
| H    | 0.000000021  | -0.000001757 | 0.000000308  |
| H    | 0.000000079  | -0.000001095 | 0.000000179  |
| H    | 0.000000236  | -0.000000306 | 0.000000003  |
| H    | -0.000000024 | -0.000001270 | -0.000001903 |
| H    | 0.000000969  | 0.000000514  | -0.000000262 |
| H    | 0.000000914  | -0.000000269 | -0.000000203 |
| H    | -0.000000752 | -0.000000984 | -0.000000152 |
| H    | -0.000001597 | -0.000000788 | 0.000001298  |
| H    | -0.000000756 | -0.000000892 | 0.000001004  |
| H    | -0.000000628 | -0.000000305 | 0.000000115  |
| H    | -0.000000642 | 0.000000804  | 0.000000377  |
| H    | -0.000000994 | 0.000001066  | -0.000000234 |
| H    | -0.000000778 | 0.000001655  | -0.000000526 |
| H    | -0.000000239 | 0.000001843  | -0.000000839 |
| H    | 0.000000222  | 0.000001185  | 0.000000379  |
| H    | 0.000000667  | 0.000001302  | 0.000000411  |

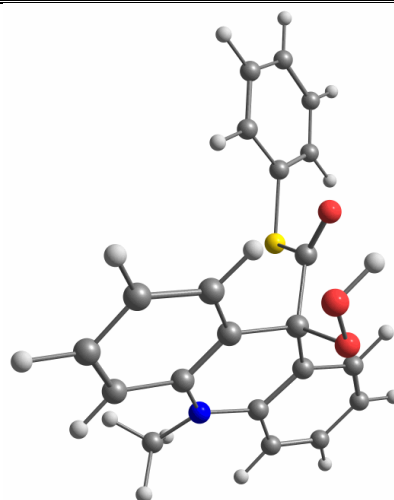

| Geom.No                      |              |              |              |                                                                                    |
|------------------------------|--------------|--------------|--------------|------------------------------------------------------------------------------------|
| 3-TS-III = -858.562621852 Ha |              |              |              |                                                                                    |
| Atom                         | X            | Y            | Z            |                                                                                    |
| C                            | 0.000001668  | 0.000001693  | -0.000001706 | 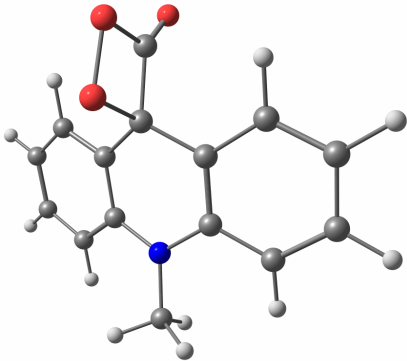 |
| C                            | -0.000001089 | -0.000001851 | 0.000001165  |                                                                                    |
| C                            | -0.000000367 | -0.000001169 | -0.000000734 |                                                                                    |
| C                            | -0.000002814 | 0.000000924  | 0.000001399  |                                                                                    |
| C                            | -0.000000362 | 0.000001022  | -0.000004683 |                                                                                    |
| C                            | 0.000002700  | 0.000001164  | 0.000003988  |                                                                                    |
| H                            | -0.000002124 | -0.000001075 | -0.000000977 |                                                                                    |
| H                            | -0.000000648 | -0.000000525 | 0.000000174  |                                                                                    |
| H                            | -0.000000321 | -0.000000268 | -0.000000218 |                                                                                    |
| H                            | -0.000000691 | 0.000002504  | 0.000001310  |                                                                                    |
| C                            | -0.000017086 | 0.000054670  | 0.000000418  |                                                                                    |
| C                            | 0.000010024  | -0.000005601 | 0.000004297  |                                                                                    |
| C                            | 0.000000008  | 0.000002454  | 0.000003356  |                                                                                    |
| N                            | 0.000000508  | -0.000004494 | -0.000002943 |                                                                                    |
| C                            | 0.000010417  | -0.000023592 | -0.000005269 |                                                                                    |
| C                            | 0.000002427  | 0.000000477  | 0.000001251  |                                                                                    |
| C                            | -0.000002474 | 0.000002539  | -0.000002411 |                                                                                    |
| C                            | 0.000001761  | 0.000000169  | -0.000000460 |                                                                                    |
| C                            | -0.000000665 | -0.000000821 | 0.000001710  |                                                                                    |
| C                            | -0.000000299 | -0.000001818 | -0.000000104 |                                                                                    |
| H                            | -0.000000966 | 0.000001462  | -0.000000044 |                                                                                    |
| H                            | -0.000000352 | 0.000000638  | 0.000000331  |                                                                                    |
| H                            | -0.000000532 | -0.000000897 | 0.000000546  |                                                                                    |
| H                            | -0.000000829 | -0.000002301 | 0.000003179  |                                                                                    |
| H                            | 0.000001748  | -0.000002958 | 0.000000892  |                                                                                    |
| H                            | -0.000001643 | -0.000002553 | -0.000000051 |                                                                                    |
| H                            | -0.000000226 | -0.000002195 | -0.000003133 |                                                                                    |
| O                            | -0.000004137 | 0.000004980  | 0.000005157  |                                                                                    |
| O                            | -0.000005940 | 0.000022784  | 0.000000099  |                                                                                    |
| O                            | 0.000012303  | -0.000045363 | -0.000006540 |                                                                                    |

| Geom.No                 |              |              |              |                                                                                      |
|-------------------------|--------------|--------------|--------------|--------------------------------------------------------------------------------------|
| III-TS = -858.539892575 |              |              |              |                                                                                      |
| Atom                    | X            | Y            | Z            |                                                                                      |
| C                       | -0.000082363 | -0.000038892 | 0.000037500  | 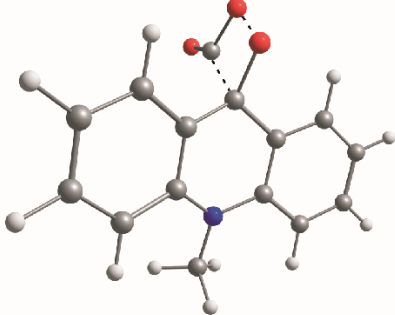 |
| C                       | 0.000032791  | -0.000030846 | 0.000225778  |                                                                                      |
| C                       | 0.000161450  | 0.000378174  | 0.000337975  |                                                                                      |
| C                       | -0.000061672 | -0.000008641 | 0.000077345  |                                                                                      |
| C                       | 0.000020070  | -0.000050955 | -0.000037902 |                                                                                      |
| C                       | 0.000041833  | 0.000028367  | -0.000007898 |                                                                                      |
| C                       | 0.020149337  | 0.039957791  | 0.019733155  |                                                                                      |
| C                       | 0.000415896  | 0.000443185  | 0.000185666  |                                                                                      |
| C                       | 0.000238951  | 0.000089401  | -0.000067893 |                                                                                      |
| N                       | -0.000002827 | 0.000030221  | -0.000023235 |                                                                                      |
| C                       | -0.000005093 | -0.000073002 | 0.000063661  |                                                                                      |
| C                       | 0.000030045  | 0.000008444  | -0.000002110 |                                                                                      |
| C                       | 0.000008916  | -0.000041645 | 0.000009151  |                                                                                      |
| C                       | 0.000014720  | 0.000047682  | -0.000148996 |                                                                                      |



|   |              |              |              |
|---|--------------|--------------|--------------|
| C | 0.000039302  | -0.000019208 | -0.000062086 |
| O | 0.002837912  | 0.005252437  | 0.002684135  |
| O | -0.002888466 | -0.005466409 | -0.002744421 |
| C | -0.020652570 | -0.035748422 | -0.019044535 |
| O | -0.000356916 | -0.004803418 | -0.001217003 |
| H | -0.000000711 | 0.000005013  | -0.000001124 |
| H | 0.000010644  | 0.000027531  | -0.000001426 |
| H | -0.000002409 | 0.000000456  | -0.000000951 |
| H | 0.000002828  | 0.000007652  | 0.000042657  |
| H | 0.000022694  | -0.000025094 | 0.000020409  |
| H | -0.000003865 | 0.000024078  | 0.000013725  |
| H | 0.000002544  | 0.000004486  | 0.000002480  |
| H | -0.000003213 | 0.000001957  | -0.000008981 |
| H | 0.000002325  | 0.000007882  | -0.000023715 |
| H | 0.000020396  | -0.000010426 | -0.000041999 |
| H | 0.000007450  | 0.000002202  | 0.000000638  |

| Geom.No              |              |             |              |                                                                                      |
|----------------------|--------------|-------------|--------------|--------------------------------------------------------------------------------------|
| 4 =-629.885916797 Ha |              |             |              |                                                                                      |
| Atom                 | X            | Y           | Z            |                                                                                      |
| C                    | 0.000056325  | 0.000000000 | -0.000039334 | 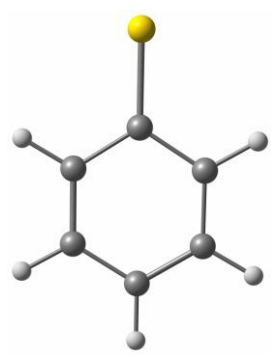 |
| C                    | -0.000021910 | 0.000000000 | 0.000013498  |                                                                                      |
| C                    | 0.000003350  | 0.000000000 | -0.000002065 |                                                                                      |
| C                    | -0.000010628 | 0.000000000 | 0.000010765  |                                                                                      |
| C                    | 0.000010333  | 0.000000000 | -0.000041218 |                                                                                      |
| C                    | -0.000027728 | 0.000000000 | -0.000015098 |                                                                                      |
| H                    | -0.000001505 | 0.000000000 | -0.000005770 |                                                                                      |
| H                    | 0.000000466  | 0.000000000 | -0.000000612 |                                                                                      |
| H                    | 0.000003933  | 0.000000000 | -0.000004726 |                                                                                      |
| H                    | 0.000015669  | 0.000000000 | 0.000030511  |                                                                                      |
| S                    | -0.000021108 | 0.000000000 | 0.000042392  |                                                                                      |
| H                    | -0.000007197 | 0.000000000 | 0.000011658  |                                                                                      |

| Geom.No             |              |              |              |                                                                                      |
|---------------------|--------------|--------------|--------------|--------------------------------------------------------------------------------------|
| 5=-670.130875334 Ha |              |              |              |                                                                                      |
| Atom                | X            | Y            | Z            |                                                                                      |
| C                   | -0.000001670 | -0.000000453 | -0.000001193 | 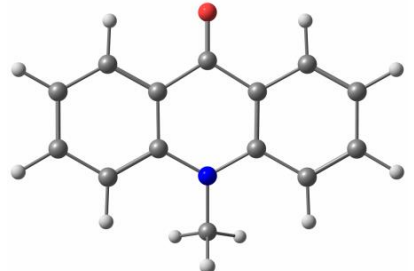 |
| C                   | 0.000008374  | -0.000005822 | -0.000001257 |                                                                                      |
| C                   | 0.000002869  | 0.000003676  | -0.000003162 |                                                                                      |
| C                   | -0.000004216 | 0.000000572  | 0.000006893  |                                                                                      |
| C                   | -0.000005048 | 0.000000891  | -0.000003333 |                                                                                      |
| C                   | 0.000004889  | -0.000001754 | -0.000002000 |                                                                                      |
| N                   | -0.000012637 | 0.000017666  | -0.000007600 |                                                                                      |
| C                   | 0.000006051  | -0.000000082 | 0.000013394  |                                                                                      |
| C                   | -0.000000121 | 0.000000061  | -0.000000647 |                                                                                      |
| C                   | 0.000007382  | -0.000003957 | 0.000003724  |                                                                                      |
| C                   | 0.000002584  | 0.000000596  | -0.000005419 |                                                                                      |
| C                   | -0.000003789 | -0.000000740 | -0.000003533 |                                                                                      |
| C                   | 0.000000399  | 0.000001187  | 0.000002142  |                                                                                      |
| C                   | -0.000007344 | -0.000001750 | 0.000004438  |                                                                                      |

|   |              |              |              |
|---|--------------|--------------|--------------|
| O | -0.000006036 | 0.000000369  | -0.000002764 |
| H | 0.000004494  | -0.000002110 | -0.000007293 |
| H | 0.000001227  | -0.000000156 | 0.000000932  |
| H | 0.000001465  | 0.000000453  | 0.000000462  |
| H | -0.000001085 | 0.000000180  | 0.000002749  |
| H | 0.000001397  | 0.000000188  | -0.000001976 |
| H | 0.000001000  | 0.000000064  | 0.000001035  |
| H | 0.000000113  | 0.000000643  | 0.000000580  |
| H | -0.000002946 | -0.000001652 | 0.000004237  |
| C | 0.000015838  | -0.000020655 | 0.000006897  |
| H | -0.000003439 | 0.000010208  | -0.000003254 |
| H | -0.000003390 | 0.000004209  | -0.000004274 |
| H | -0.000006362 | -0.000001834 | 0.000000222  |

| Geom.No                               |              |              |              | Atom | X | Y | Z | 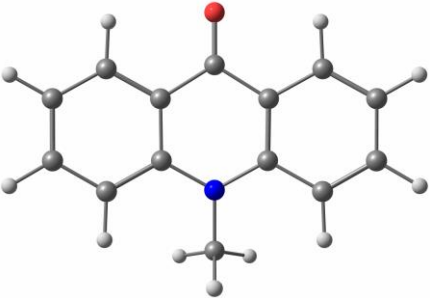 |
|---------------------------------------|--------------|--------------|--------------|------|---|---|---|-------------------------------------------------------------------------------------|
| 5*-S <sub>1</sub> = -669.953518683 Ha |              |              |              |      |   |   |   |                                                                                     |
| C                                     | 0.001468800  | 0.001306003  | -0.014311619 |      |   |   |   |                                                                                     |
| C                                     | 0.004149509  | -0.000735113 | 0.018325511  |      |   |   |   |                                                                                     |
| C                                     | -0.007929979 | 0.000236431  | 0.003322763  |      |   |   |   |                                                                                     |
| C                                     | 0.006366228  | -0.000302096 | -0.001943657 |      |   |   |   |                                                                                     |
| C                                     | 0.002246243  | -0.000461559 | 0.001194686  |      |   |   |   |                                                                                     |
| C                                     | -0.005244037 | -0.001119324 | -0.002114223 |      |   |   |   |                                                                                     |
| C                                     | 0.002234971  | 0.002222086  | 0.001039014  |      |   |   |   |                                                                                     |
| C                                     | -0.001297352 | -0.000930055 | -0.008452168 |      |   |   |   |                                                                                     |
| C                                     | 0.017660061  | -0.003111007 | -0.005658745 |      |   |   |   |                                                                                     |
| N                                     | -0.006147717 | -0.003163889 | -0.003149872 |      |   |   |   |                                                                                     |
| C                                     | 0.001646542  | 0.000527929  | 0.006435157  |      |   |   |   |                                                                                     |
| C                                     | 0.002147453  | -0.000444212 | 0.001369963  |      |   |   |   |                                                                                     |
| C                                     | -0.004625234 | -0.001228109 | -0.003212401 |      |   |   |   |                                                                                     |
| C                                     | -0.011272831 | 0.003546751  | 0.008307965  |      |   |   |   |                                                                                     |
| C                                     | 0.002077794  | 0.004103694  | 0.000763843  |      |   |   |   |                                                                                     |
| O                                     | -0.002882271 | -0.000726284 | -0.001551682 |      |   |   |   |                                                                                     |
| H                                     | 0.000157316  | 0.000901467  | 0.000726183  |      |   |   |   |                                                                                     |
| H                                     | 0.000013596  | -0.000065916 | 0.000470644  |      |   |   |   |                                                                                     |
| H                                     | 0.000088075  | 0.000455664  | 0.000087984  |      |   |   |   |                                                                                     |
| H                                     | -0.000411324 | 0.000239363  | 0.000014109  |      |   |   |   |                                                                                     |
| H                                     | -0.000182535 | 0.000199133  | -0.000392060 |      |   |   |   |                                                                                     |
| H                                     | 0.000158968  | 0.000443207  | -0.000037869 |      |   |   |   |                                                                                     |
| H                                     | 0.000401083  | -0.000134057 | -0.000217245 |      |   |   |   |                                                                                     |
| H                                     | 0.000774354  | 0.000792950  | -0.000369232 |      |   |   |   |                                                                                     |
| H                                     | -0.000473261 | -0.000738933 | 0.000646528  |      |   |   |   |                                                                                     |
| H                                     | 0.000239722  | -0.000864334 | -0.000619243 |      |   |   |   |                                                                                     |
| H                                     | -0.001364177 | -0.000949789 | -0.000674335 |      |   |   |   |                                                                                     |

| Geom.No                               |              |              |              | 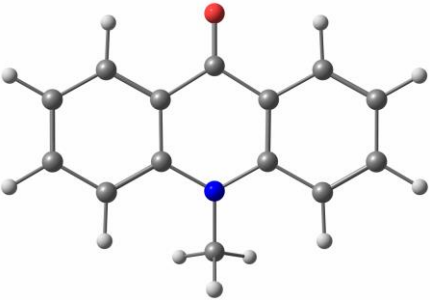 |
|---------------------------------------|--------------|--------------|--------------|------------------------------------------------------------------------------------|
| 5*-T <sub>1</sub> = -670.036771603 Ha |              |              |              |                                                                                    |
| Atom                                  | X            | Y            | Z            |                                                                                    |
| C                                     | 0.000031763  | -0.000004276 | 0.000001298  |                                                                                    |
| C                                     | -0.000032977 | 0.000036818  | -0.000001408 |                                                                                    |
| C                                     | -0.000009151 | -0.000035414 | 0.000003644  |                                                                                    |
| C                                     | 0.000010651  | 0.000010191  | -0.000002532 |                                                                                    |
| C                                     | -0.000004088 | 0.000020294  | 0.000000904  |                                                                                    |
| C                                     | -0.000014282 | -0.000033896 | -0.000001649 |                                                                                    |
| C                                     | -0.000000047 | -0.000012189 | 0.000010570  |                                                                                    |
| C                                     | 0.000006692  | -0.000030848 | 0.000005949  |                                                                                    |
| C                                     | 0.000034209  | 0.000039840  | -0.000014051 |                                                                                    |
| N                                     | 0.000011567  | -0.000023637 | 0.000007235  |                                                                                    |
| C                                     | -0.000009968 | 0.000009827  | -0.000000632 |                                                                                    |
| C                                     | 0.000003729  | 0.000017675  | -0.000001404 |                                                                                    |
| C                                     | 0.000010766  | -0.000032138 | -0.000000229 |                                                                                    |
| C                                     | -0.000051526 | -0.000000693 | 0.000007657  |                                                                                    |
| C                                     | 0.000234381  | 0.000096483  | 0.000233334  |                                                                                    |
| O                                     | -0.000000733 | 0.000034594  | -0.000007049 |                                                                                    |
| H                                     | -0.000010537 | -0.000009488 | -0.000005728 |                                                                                    |
| H                                     | 0.000001303  | 0.000000604  | -0.000000975 |                                                                                    |
| H                                     | 0.000000837  | -0.000005251 | 0.000000877  |                                                                                    |
| H                                     | -0.000008965 | -0.000000708 | -0.000000433 |                                                                                    |
| H                                     | 0.000008256  | -0.000000499 | -0.000000331 |                                                                                    |
| H                                     | -0.000000869 | -0.000005464 | 0.000001639  |                                                                                    |
| H                                     | -0.000002009 | 0.000001781  | -0.000000604 |                                                                                    |
| H                                     | -0.000003426 | 0.000004825  | 0.000003783  |                                                                                    |
| H                                     | -0.000236222 | -0.000075194 | -0.000248065 |                                                                                    |
| H                                     | -0.000014891 | -0.000010629 | -0.000018703 |                                                                                    |
| H                                     | 0.000045538  | 0.000007393  | 0.000026903  |                                                                                    |

| Geom.No               |              |              |              | 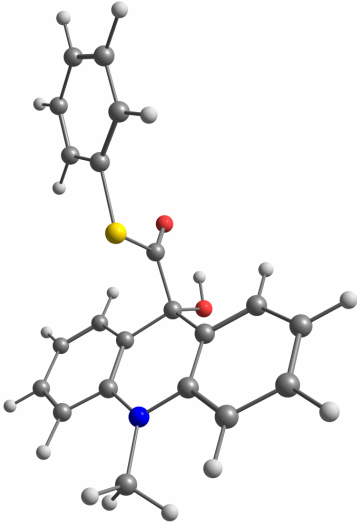 |
|-----------------------|--------------|--------------|--------------|--------------------------------------------------------------------------------------|
| 6 = -1413.88738546 Ha |              |              |              |                                                                                      |
| Atom                  | X            | Y            | Z            |                                                                                      |
| C                     | -0.000000218 | 0.000000835  | -0.000000316 |                                                                                      |
| C                     | 0.000002711  | 0.000001939  | 0.000000233  |                                                                                      |
| C                     | 0.000000657  | 0.000001222  | -0.000000643 |                                                                                      |
| C                     | 0.000000961  | 0.000000192  | -0.000000360 |                                                                                      |
| C                     | -0.000000477 | 0.000000474  | -0.000000692 |                                                                                      |
| C                     | -0.000000935 | 0.000001068  | -0.000000389 |                                                                                      |
| H                     | 0.000002102  | 0.000001477  | -0.000000821 |                                                                                      |
| H                     | 0.000001418  | 0.000001133  | -0.000000843 |                                                                                      |
| H                     | 0.000000261  | 0.000000164  | -0.000000307 |                                                                                      |
| H                     | -0.000000769 | -0.000000779 | 0.000000236  |                                                                                      |
| C                     | -0.000000520 | 0.000003589  | -0.000000687 |                                                                                      |
| C                     | 0.000000099  | 0.000004150  | 0.000001993  |                                                                                      |
| C                     | 0.000001405  | 0.000000981  | 0.000000289  |                                                                                      |
| N                     | 0.000002309  | 0.000001689  | -0.000002028 |                                                                                      |
| C                     | 0.000001296  | 0.000000296  | -0.000001486 |                                                                                      |
| C                     | -0.000000162 | 0.000004161  | 0.000000287  |                                                                                      |
| C                     | -0.000001670 | 0.000001118  | -0.000000216 |                                                                                      |

|   |              |              |              |
|---|--------------|--------------|--------------|
| C | 0.000000325  | 0.000000179  | 0.000000339  |
| C | 0.000000003  | 0.000002822  | 0.000000630  |
| C | -0.000000507 | 0.000001906  | -0.000001993 |
| H | -0.000000418 | -0.000000280 | 0.000001354  |
| H | -0.000001030 | 0.000001431  | 0.000000660  |
| H | 0.000000338  | 0.000002253  | -0.000000104 |
| H | 0.000001274  | 0.000002126  | -0.000000911 |
| H | 0.000001246  | 0.000003234  | -0.000001228 |
| H | 0.000002060  | 0.000001979  | -0.000000975 |
| H | 0.000001806  | 0.000002825  | -0.000000730 |
| S | -0.000004044 | -0.000002698 | 0.000003055  |
| O | -0.000002092 | 0.000000395  | 0.000001028  |
| C | 0.000001593  | -0.000003486 | -0.000001056 |
| C | -0.000000243 | -0.000003109 | 0.000000290  |
| C | -0.000000516 | -0.000003580 | -0.000000041 |
| C | -0.000000724 | -0.000004620 | 0.000000184  |
| C | -0.000000930 | -0.000003532 | 0.000000429  |
| C | -0.000000314 | -0.000002288 | 0.000000633  |
| H | 0.000000214  | -0.000003243 | -0.000000170 |
| H | -0.000000174 | -0.000004662 | -0.000000103 |
| H | -0.000000931 | -0.000005000 | 0.000000441  |
| H | -0.000001340 | -0.000003594 | 0.000000686  |
| H | -0.000000788 | -0.000002248 | 0.000000333  |
| O | -0.000001442 | -0.000001449 | 0.000001527  |
| H | -0.000001831 | 0.000000929  | 0.000001472  |

| Geom.No               |              |              |              |
|-----------------------|--------------|--------------|--------------|
| 7 = -1413.30814707 Ha |              |              |              |
| Atom                  | X            | Y            | Z            |
| C                     | -0.000001673 | 0.000011571  | 0.000014517  |
| C                     | -0.000027109 | 0.000008782  | 0.000024874  |
| C                     | -0.000014545 | 0.000005282  | 0.000014447  |
| C                     | 0.000004553  | 0.000003355  | -0.000002373 |
| C                     | -0.000002235 | 0.000003608  | 0.000005216  |
| C                     | 0.000003625  | 0.000001661  | -0.000002317 |
| S                     | 0.000030777  | -0.000018630 | -0.000041175 |
| C                     | -0.000003812 | -0.000025243 | -0.000016172 |
| O                     | -0.000003776 | 0.000043364  | 0.000013533  |
| H                     | -0.000001348 | 0.000000884  | -0.000011652 |
| C                     | 0.000008288  | -0.000024319 | 0.000021536  |
| C                     | 0.000002548  | 0.000003574  | -0.000000581 |
| C                     | -0.000002220 | 0.000000592  | 0.000002097  |
| N                     | 0.000003033  | -0.000002339 | 0.000003385  |
| C                     | -0.000003787 | -0.000004146 | -0.000004196 |
| C                     | 0.000005026  | 0.000004413  | -0.000000177 |
| C                     | -0.000000956 | -0.000002659 | -0.000001560 |
| C                     | -0.000003064 | -0.000000199 | 0.000002466  |
| C                     | -0.000001534 | 0.000000876  | -0.000002757 |
| C                     | -0.000000805 | -0.000004449 | -0.000001400 |
| C                     | 0.000001174  | -0.000001934 | 0.000000134  |
| C                     | 0.000001856  | -0.000003199 | 0.000000160  |

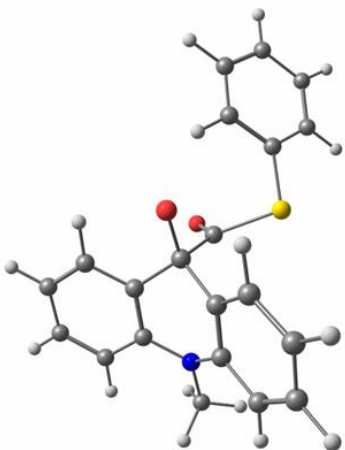

|   |              |              |              |
|---|--------------|--------------|--------------|
| C | 0.000001032  | 0.000000001  | 0.000000347  |
| C | 0.000000255  | -0.000004488 | -0.000001428 |
| O | 0.000005607  | 0.000009381  | -0.000011815 |
| C | -0.000000428 | 0.000000192  | -0.000000559 |
| H | -0.000002756 | -0.000000356 | -0.000000746 |
| H | -0.000001916 | -0.000000150 | -0.000001150 |
| H | -0.000002620 | -0.000001039 | -0.000000602 |
| H | -0.000001569 | -0.000001435 | -0.000000328 |
| H | 0.000000971  | -0.000001889 | -0.000000829 |
| H | 0.000000969  | -0.000000472 | 0.000000502  |
| H | 0.000002479  | -0.000002000 | -0.000000017 |
| H | 0.000002231  | -0.000002639 | -0.000000164 |
| H | 0.000001254  | -0.000000864 | 0.000000087  |
| H | 0.000000072  | -0.000000630 | 0.000000281  |
| H | -0.000000032 | -0.000001939 | -0.000000243 |
| H | -0.000000824 | 0.000004670  | 0.000001344  |
| H | 0.000000141  | 0.000003031  | -0.000000727 |
| H | 0.000001120  | 0.000001305  | 0.000000781  |
| H | -0.000000002 | -0.000001523 | -0.000002741 |

| Geom.No<br>VIII-TS. |              |              |              |
|---------------------|--------------|--------------|--------------|
| Atom                | X            | Y            | Z            |
| C                   | -0.000000188 | 0.000002811  | -0.000001865 |
| C                   | 0.000004359  | -0.000000004 | 0.000002820  |
| C                   | -0.000001200 | 0.000000607  | 0.000001121  |
| C                   | 0.000000943  | 0.000001093  | -0.000002201 |
| C                   | -0.000000316 | 0.000002864  | -0.000000364 |
| C                   | -0.000001609 | 0.000004094  | -0.000001265 |
| C                   | 0.000002669  | -0.000004405 | -0.000003726 |
| C                   | 0.000005846  | 0.000000113  | -0.000002078 |
| C                   | 0.000002248  | 0.000000189  | -0.000004387 |
| N                   | 0.000000458  | -0.000004277 | -0.000002644 |
| C                   | 0.000000419  | -0.000004797 | -0.000002071 |
| C                   | 0.000001386  | -0.000003936 | -0.000004155 |
| C                   | -0.000000517 | -0.000002650 | -0.000004281 |
| C                   | -0.000000648 | -0.000003145 | -0.000002630 |
| C                   | 0.000007643  | 0.000012635  | -0.000002217 |
| O                   | 0.000004237  | -0.000005200 | 0.000002528  |
| O                   | -0.000016286 | 0.000001237  | -0.000007837 |
| C                   | -0.000002535 | -0.000000846 | -0.000002133 |
| S                   | -0.000008164 | -0.000003874 | 0.000009965  |
| C                   | -0.000001329 | 0.000002161  | 0.000003175  |
| C                   | -0.000000381 | 0.000001822  | 0.000002806  |
| C                   | 0.000000264  | 0.000002987  | 0.000004605  |
| C                   | 0.000000286  | 0.000002363  | 0.000005472  |
| C                   | 0.000000411  | 0.000000752  | 0.000006060  |
| C                   | 0.000001043  | -0.000000253 | 0.000005151  |
| H                   | 0.000000882  | -0.000001848 | 0.000005492  |
| H                   | 0.000000139  | -0.000003873 | -0.000004368 |
| H                   | -0.000000026 | -0.000000332 | -0.000003084 |

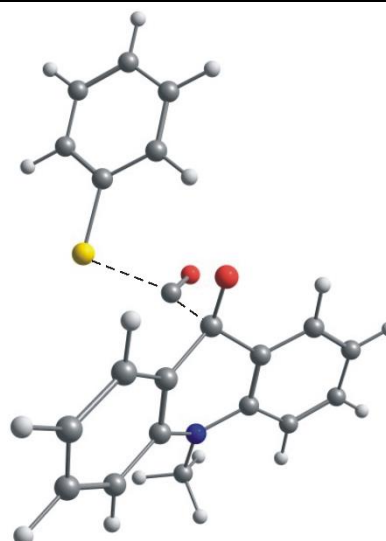

|   |              |              |              |
|---|--------------|--------------|--------------|
| H | 0.000000437  | -0.000005755 | -0.000004629 |
| H | 0.000000323  | -0.000004247 | -0.000003223 |
| H | -0.000000023 | 0.000000389  | -0.000001607 |
| H | -0.000000902 | 0.000003879  | -0.000000860 |
| H | -0.000001020 | 0.000005514  | -0.000001081 |
| H | -0.000000720 | 0.000003524  | -0.000001472 |
| H | 0.000000321  | -0.000002176 | -0.000000857 |
| H | 0.000000339  | -0.000004095 | -0.000001124 |
| H | 0.000000351  | -0.000002905 | -0.000002716 |
| H | 0.000000915  | 0.000000325  | 0.000007499  |
| H | 0.000000240  | 0.000003312  | 0.000006751  |
| H | -0.000000152 | 0.000004447  | 0.000003830  |
| H | -0.000000144 | 0.000001500  | 0.000001601  |

| Geom.No               |              |              |              | Atom | X | Y | Z | 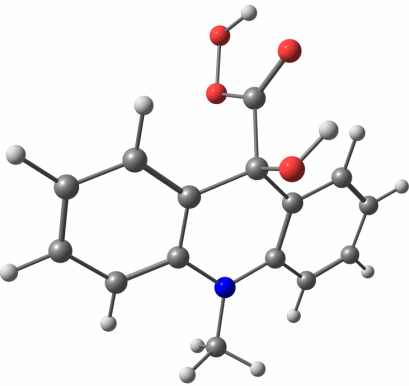 |
|-----------------------|--------------|--------------|--------------|------|---|---|---|-------------------------------------------------------------------------------------|
| 8 = -935.003763764 Ha |              |              |              |      |   |   |   |                                                                                     |
| C                     | -0.000011816 | -0.000000055 | 0.000006695  |      |   |   |   |                                                                                     |
| C                     | -0.000001296 | 0.000001799  | -0.000005911 |      |   |   |   |                                                                                     |
| C                     | 0.000001697  | 0.000003643  | 0.000000960  |      |   |   |   |                                                                                     |
| C                     | -0.000003509 | 0.000004590  | 0.000003896  |      |   |   |   |                                                                                     |
| C                     | -0.000004051 | 0.000002330  | 0.000000919  |      |   |   |   |                                                                                     |
| C                     | 0.000012610  | -0.000004624 | -0.000011272 |      |   |   |   |                                                                                     |
| H                     | -0.000000780 | 0.000000920  | 0.000000441  |      |   |   |   |                                                                                     |
| H                     | -0.000003545 | 0.000003169  | -0.000000018 |      |   |   |   |                                                                                     |
| H                     | -0.000001036 | 0.000005354  | 0.000000397  |      |   |   |   |                                                                                     |
| H                     | 0.000000274  | 0.000003163  | 0.000000536  |      |   |   |   |                                                                                     |
| C                     | 0.000001520  | 0.000009386  | 0.000007886  |      |   |   |   |                                                                                     |
| C                     | -0.000001172 | -0.000004289 | 0.000001156  |      |   |   |   |                                                                                     |
| C                     | 0.000002923  | 0.000000690  | 0.000001562  |      |   |   |   |                                                                                     |
| N                     | 0.000004470  | 0.000000468  | -0.000000024 |      |   |   |   |                                                                                     |
| C                     | -0.000000565 | -0.000011272 | -0.000003795 |      |   |   |   |                                                                                     |
| C                     | -0.000005465 | 0.000000412  | -0.000000619 |      |   |   |   |                                                                                     |
| C                     | -0.000000927 | -0.000001821 | -0.000004717 |      |   |   |   |                                                                                     |
| C                     | 0.000004641  | -0.000003592 | -0.000000118 |      |   |   |   |                                                                                     |
| C                     | -0.000000077 | -0.000003952 | 0.000001369  |      |   |   |   |                                                                                     |
| C                     | -0.000001306 | -0.000002856 | -0.000004454 |      |   |   |   |                                                                                     |
| H                     | 0.000002667  | -0.000001908 | 0.000002584  |      |   |   |   |                                                                                     |
| H                     | 0.000001472  | -0.000003911 | -0.000000527 |      |   |   |   |                                                                                     |
| H                     | 0.000000899  | -0.000004825 | -0.000002191 |      |   |   |   |                                                                                     |
| H                     | -0.000000580 | -0.000003445 | -0.000002943 |      |   |   |   |                                                                                     |
| H                     | -0.000002232 | -0.000001361 | -0.000002680 |      |   |   |   |                                                                                     |
| H                     | -0.000000279 | -0.000002631 | -0.000003116 |      |   |   |   |                                                                                     |
| H                     | 0.000000207  | -0.000003881 | -0.000000705 |      |   |   |   |                                                                                     |
| O                     | 0.000001740  | 0.000001780  | 0.000000210  |      |   |   |   |                                                                                     |
| H                     | 0.000001324  | -0.000000014 | 0.000003050  |      |   |   |   |                                                                                     |
| O                     | 0.000002002  | 0.000007228  | 0.000002219  |      |   |   |   |                                                                                     |
| O                     | -0.000004766 | 0.000001095  | 0.000004190  |      |   |   |   |                                                                                     |
| H                     | 0.000002681  | 0.000000204  | -0.000001820 |      |   |   |   |                                                                                     |
| O                     | 0.000002275  | 0.000008205  | 0.000006842  |      |   |   |   |                                                                                     |

**Geom.No  
XI-TS.**

| Atom | X            | Y            | Z            |
|------|--------------|--------------|--------------|
| C    | -0.00000393  | 0.00000061   | -0.00001301  |
| C    | -0.00009261  | -0.00006492  | -0.00009743  |
| C    | -0.000020159 | -0.000020949 | 0.000029853  |
| C    | 0.00002833   | 0.000011480  | -0.000011960 |
| C    | 0.000008803  | -0.000004319 | -0.00000674  |
| N    | -0.00002642  | -0.000002612 | 0.000006807  |
| C    | 0.000010156  | 0.000021830  | -0.000014382 |
| C    | 0.000004439  | -0.000012396 | 0.000017802  |
| C    | 0.000006194  | -0.000006840 | -0.000004570 |
| C    | 0.037752729  | -0.010613958 | 0.016223306  |
| C    | -0.000009805 | -0.000003220 | 0.000017682  |
| C    | 0.000007399  | 0.000005947  | -0.000004797 |
| C    | 0.000002793  | -0.000000742 | -0.000001355 |
| C    | -0.000008021 | -0.000000193 | -0.000002468 |
| O    | 0.066534301  | 0.030771640  | -0.017672502 |
| C    | -0.037746893 | 0.010725529  | -0.016272031 |
| O    | -0.000070513 | 0.000021237  | -0.000030949 |
| O    | -0.000008667 | 0.000018909  | 0.000065223  |
| C    | -0.000000771 | -0.000007573 | -0.000001219 |
| O    | 0.000009894  | -0.000036501 | 0.000030209  |
| H    | 0.000001325  | -0.000001663 | 0.000006532  |
| H    | -0.000000183 | 0.000001885  | 0.000002085  |
| H    | -0.000001523 | 0.000001716  | 0.000001194  |
| H    | -0.000001182 | 0.000004167  | -0.000003993 |
| H    | 0.000000902  | -0.000004177 | 0.000006900  |
| H    | -0.000001527 | -0.000000107 | 0.000000810  |
| H    | -0.000001441 | -0.000002085 | -0.000000646 |
| H    | 0.000002540  | -0.000002983 | -0.000002224 |
| H    | -0.000002208 | -0.000004773 | 0.000000559  |
| H    | -0.000000011 | 0.000002981  | -0.000003092 |
| H    | 0.000000068  | -0.000003665 | 0.000002148  |
| H    | -0.066453197 | -0.030839426 | 0.017658142  |
| H    | -0.000005979 | -0.000012708 | -0.000031343 |

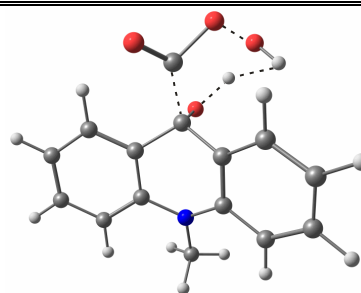

**Geom.No**  
**9= -783.845241706 Ha**

| Atom | X            | Y            | Z            |
|------|--------------|--------------|--------------|
| C    | -0.000003697 | 0.000002446  | -0.000014793 |
| C    | 0.000002314  | -0.000000933 | 0.000008333  |
| C    | -0.000001217 | -0.000003198 | 0.000002700  |
| C    | 0.000004336  | 0.000000328  | 0.000001581  |
| C    | 0.000004926  | -0.000001305 | 0.000003524  |
| C    | -0.000007755 | -0.000001029 | -0.000007555 |
| N    | 0.000007393  | 0.000000704  | 0.000000979  |
| C    | -0.000005213 | -0.000002967 | -0.000001330 |
| C    | 0.000000330  | 0.000003971  | 0.000003834  |
| C    | -0.000011000 | -0.000008618 | -0.000007880 |
| C    | -0.000002247 | 0.000003865  | -0.000007202 |
| C    | -0.000002250 | 0.000001186  | 0.000006776  |
| C    | 0.000003876  | 0.000000304  | 0.000005644  |
| C    | 0.000009818  | 0.000004769  | -0.000005549 |
| C    | -0.000012508 | 0.000004987  | 0.000019564  |
| O    | 0.000003593  | 0.000002240  | 0.000001128  |
| C    | -0.000008468 | -0.000005079 | -0.000006976 |
| O    | -0.000006529 | -0.000007501 | -0.000010075 |
| H    | 0.000001778  | 0.000001712  | 0.000001095  |
| H    | -0.000000735 | 0.000001005  | 0.000000100  |
| H    | 0.000002823  | 0.000000808  | 0.000000856  |
| H    | 0.000009003  | 0.000001827  | -0.000001928 |
| H    | 0.000001635  | 0.000000603  | 0.000003297  |
| H    | 0.000001306  | -0.000000319 | 0.000001102  |
| H    | -0.000001737 | -0.000001334 | -0.000000322 |
| H    | -0.000001556 | -0.000001767 | -0.000002097 |
| H    | 0.000002183  | 0.000002078  | -0.000006761 |
| H    | -0.000000947 | -0.000001576 | 0.000003175  |
| H    | 0.000002443  | 0.000002699  | -0.000000949 |
| H    | 0.000008102  | 0.000000095  | 0.000009727  |

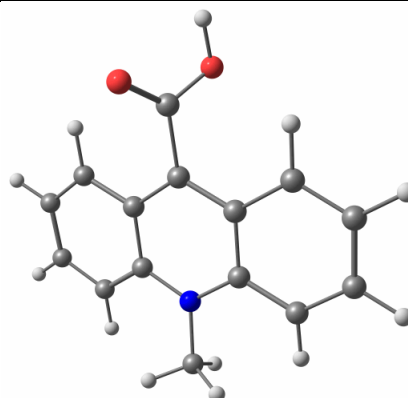



R<sub>2</sub>=OCH<sub>3</sub>, R<sub>4</sub>=H, R<sub>6</sub>=H, R<sub>2'</sub>=H

Geom.No  
1 = -1452.38473080 Ha

| Atom | X            | Y            | Z            |
|------|--------------|--------------|--------------|
| C    | -0.000024540 | -0.000016557 | 0.000002846  |
| C    | -0.000009473 | 0.000004615  | -0.000004909 |
| C    | 0.000013116  | 0.000003547  | -0.000002309 |
| C    | -0.000006419 | -0.000002262 | 0.000006811  |
| C    | -0.000003536 | 0.000002151  | -0.000015756 |
| C    | 0.000014992  | 0.000004608  | 0.000001497  |
| S    | 0.000009109  | 0.000015219  | -0.000004765 |
| C    | -0.000008617 | -0.000034747 | -0.000005876 |
| O    | 0.000006327  | 0.000009540  | 0.000004884  |
| C    | -0.000020918 | 0.000031864  | -0.000022584 |
| C    | 0.000012682  | -0.000012334 | 0.000013550  |
| C    | -0.000002387 | -0.000001549 | 0.000011383  |
| N    | -0.000003348 | 0.000005175  | -0.000003412 |
| C    | 0.000008201  | -0.000006411 | -0.000001109 |
| C    | 0.000012672  | -0.000009094 | 0.000002754  |
| C    | -0.000005943 | -0.000000019 | 0.000001690  |
| C    | 0.000001260  | 0.000002081  | -0.000002776 |
| C    | -0.000002322 | -0.000001999 | 0.000003238  |
| C    | 0.000002947  | 0.000001407  | -0.000004064 |
| C    | 0.000001503  | 0.000002802  | 0.000000687  |
| C    | 0.000003084  | -0.000002599 | 0.000002134  |
| C    | -0.000001277 | 0.000000404  | 0.000000441  |
| C    | -0.000001535 | 0.000000617  | 0.000001403  |
| C    | 0.000000976  | -0.000001886 | 0.000003995  |
| H    | 0.000000410  | -0.000000859 | -0.000000345 |
| H    | -0.000000947 | -0.000001952 | 0.000003246  |
| H    | -0.000000366 | -0.000002077 | 0.000001054  |
| H    | -0.000000905 | -0.000000069 | 0.000000039  |
| H    | 0.000001444  | -0.000001963 | -0.000000417 |
| H    | 0.000003927  | 0.000001373  | -0.000001633 |
| H    | 0.000003422  | 0.000000347  | 0.000000482  |
| H    | 0.000000303  | 0.000001249  | 0.000001782  |
| H    | 0.000002079  | -0.000006218 | 0.000003665  |
| H    | 0.000003277  | -0.000002118 | 0.000003142  |
| H    | 0.000005850  | -0.000001040 | 0.000005472  |
| H    | -0.000000672 | 0.000001599  | -0.000002741 |

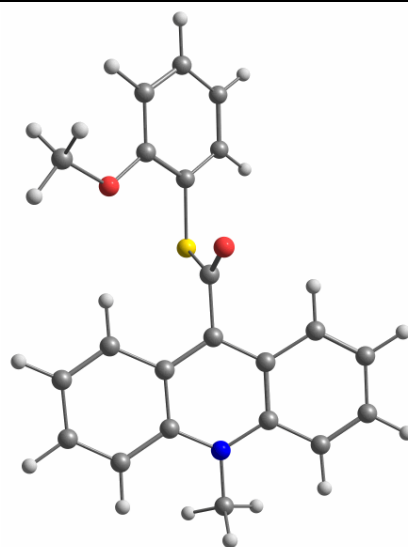

|   |              |              |              |
|---|--------------|--------------|--------------|
| H | -0.00000977  | 0.000001460  | -0.000002638 |
| H | -0.000004085 | 0.000003772  | -0.000003750 |
| H | -0.000003964 | 0.000002470  | -0.000002028 |
| O | 0.000001592  | 0.000012352  | -0.000010725 |
| C | 0.000003476  | -0.000006020 | 0.000023703  |
| H | -0.000001482 | -0.000000525 | -0.000003394 |
| H | -0.000006599 | 0.000000688  | -0.000002639 |
| H | -0.000002338 | 0.000002960  | -0.000002027 |

| Geom.No              |              |              |              | Atom | X | Y | Z | 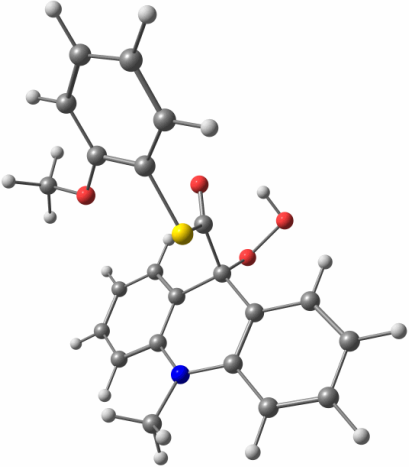 |
|----------------------|--------------|--------------|--------------|------|---|---|---|-------------------------------------------------------------------------------------|
| 2= -1603.54078905 Ha |              |              |              |      |   |   |   |                                                                                     |
| C                    | 0.000003439  | -0.000003421 | -0.000001403 |      |   |   |   |                                                                                     |
| C                    | 0.000007086  | -0.000003088 | -0.000004246 |      |   |   |   |                                                                                     |
| C                    | -0.000005368 | -0.000003032 | 0.000010069  |      |   |   |   |                                                                                     |
| C                    | 0.000002881  | -0.000003766 | -0.000000956 |      |   |   |   |                                                                                     |
| C                    | 0.000002064  | -0.000004828 | 0.000004144  |      |   |   |   |                                                                                     |
| C                    | 0.000000603  | 0.000000841  | 0.000000362  |      |   |   |   |                                                                                     |
| C                    | -0.000004923 | -0.000009587 | 0.000002566  |      |   |   |   |                                                                                     |
| C                    | 0.000005622  | 0.000003023  | 0.000003885  |      |   |   |   |                                                                                     |
| C                    | -0.000006241 | -0.000003683 | -0.000007908 |      |   |   |   |                                                                                     |
| N                    | 0.000007282  | 0.000008048  | -0.000003971 |      |   |   |   |                                                                                     |
| C                    | -0.000003226 | 0.000002764  | 0.000006314  |      |   |   |   |                                                                                     |
| C                    | 0.000001669  | 0.000001851  | -0.000000035 |      |   |   |   |                                                                                     |
| C                    | -0.000000069 | 0.000001189  | -0.000005723 |      |   |   |   |                                                                                     |
| C                    | -0.000004043 | 0.000002992  | 0.000002124  |      |   |   |   |                                                                                     |
| C                    | 0.000002211  | 0.000011527  | 0.000004952  |      |   |   |   |                                                                                     |
| O                    | -0.000000360 | -0.000001355 | -0.000005826 |      |   |   |   |                                                                                     |
| O                    | -0.000004977 | 0.000002108  | -0.000003854 |      |   |   |   |                                                                                     |
| O                    | 0.000010314  | 0.000004394  | -0.000002111 |      |   |   |   |                                                                                     |
| C                    | -0.000002863 | -0.000005329 | 0.000001139  |      |   |   |   |                                                                                     |
| S                    | 0.000001952  | -0.000001856 | -0.000004753 |      |   |   |   |                                                                                     |
| C                    | -0.000014241 | -0.000002698 | 0.000016651  |      |   |   |   |                                                                                     |
| C                    | 0.000009354  | 0.000013762  | -0.000005890 |      |   |   |   |                                                                                     |
| C                    | -0.000004502 | -0.000000606 | 0.000002766  |      |   |   |   |                                                                                     |
| C                    | -0.000000898 | 0.000002495  | -0.000004777 |      |   |   |   |                                                                                     |
| C                    | -0.000003012 | 0.000001047  | 0.000002765  |      |   |   |   |                                                                                     |
| C                    | -0.000000456 | 0.000001732  | -0.000011568 |      |   |   |   |                                                                                     |
| H                    | 0.000000452  | -0.000002189 | 0.000003452  |      |   |   |   |                                                                                     |
| H                    | 0.000001742  | -0.000003192 | 0.000001467  |      |   |   |   |                                                                                     |
| H                    | 0.000003461  | -0.000004512 | 0.000000648  |      |   |   |   |                                                                                     |
| H                    | 0.000001309  | 0.000001802  | 0.000000022  |      |   |   |   |                                                                                     |
| H                    | 0.000001204  | 0.000001642  | -0.000002586 |      |   |   |   |                                                                                     |
| H                    | -0.000000708 | 0.000003297  | -0.000001719 |      |   |   |   |                                                                                     |
| H                    | -0.000002747 | 0.000001601  | -0.000000881 |      |   |   |   |                                                                                     |
| H                    | -0.000001891 | 0.000000493  | -0.000000221 |      |   |   |   |                                                                                     |
| H                    | 0.000000288  | -0.000001569 | 0.000001670  |      |   |   |   |                                                                                     |
| H                    | -0.000000758 | -0.000001755 | 0.000001763  |      |   |   |   |                                                                                     |
| H                    | -0.000001128 | -0.000000644 | 0.000001209  |      |   |   |   |                                                                                     |

|   |              |              |              |
|---|--------------|--------------|--------------|
| O | 0.000003092  | -0.000011805 | 0.000002978  |
| H | 0.000000499  | -0.000002144 | 0.000000633  |
| H | -0.000001260 | 0.000001224  | -0.000000685 |
| H | -0.000003042 | 0.000004930  | -0.000001254 |
| H | -0.000001134 | 0.000001170  | 0.000001650  |
| H | 0.000002284  | -0.000000513 | -0.000006798 |
| C | -0.000005837 | -0.000001321 | -0.000002414 |
| H | 0.000001243  | -0.000001096 | -0.000001257 |
| H | 0.000001850  | 0.000001689  | 0.000003962  |
| H | 0.000001781  | -0.000001633 | 0.000003645  |

| Geom.No<br>4= -744.403700456 Ha |              |              |              |
|---------------------------------|--------------|--------------|--------------|
| Atom                            | X            | Y            | Z            |
| C                               | -0.000077524 | 0.000000000  | -0.000082393 |
| C                               | -0.000097055 | 0.000000000  | -0.000018789 |
| C                               | 0.000114717  | 0.000000000  | 0.000006667  |
| C                               | -0.000082441 | 0.000000000  | 0.000078147  |
| C                               | -0.000047342 | -0.000000000 | -0.000085946 |
| C                               | 0.000199964  | -0.000000000 | 0.000113931  |
| H                               | 0.000044865  | -0.000000000 | 0.000028725  |
| H                               | -0.000012032 | -0.000000000 | -0.000000998 |
| H                               | 0.000022320  | 0.000000000  | -0.000015395 |
| H                               | 0.000007623  | -0.000000000 | 0.000026424  |
| O                               | -0.000118585 | 0.000000000  | -0.000071098 |
| C                               | 0.000091589  | -0.000000000 | 0.000033946  |
| H                               | -0.000030818 | -0.000000000 | 0.000013472  |
| H                               | -0.000003050 | 0.000005254  | -0.000011278 |
| H                               | -0.000003050 | -0.000005254 | -0.000011278 |
| S                               | -0.000009183 | 0.000000000  | -0.000004137 |

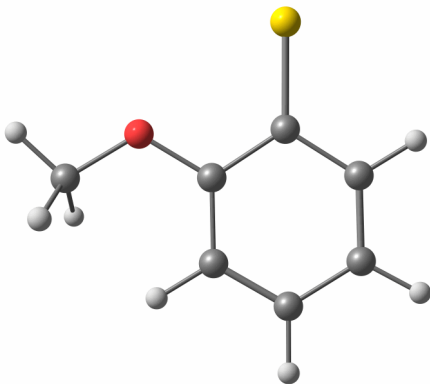

| Geom.No<br>6= -1528.41187944 Ha |              |              |              |
|---------------------------------|--------------|--------------|--------------|
| Atom                            | X            | Y            | Z            |
| C                               | -0.000009300 | 0.000003948  | 0.000001894  |
| C                               | 0.000006824  | 0.000002705  | 0.000002157  |
| C                               | 0.000000863  | 0.000001456  | -0.000003866 |
| C                               | -0.000001550 | 0.000003264  | 0.000000710  |
| C                               | -0.000003134 | 0.000001880  | -0.000004465 |
| C                               | 0.000003354  | 0.000000346  | -0.000001756 |
| S                               | -0.000003357 | 0.000004261  | -0.000001267 |
| C                               | 0.000001309  | -0.000004207 | -0.000000525 |
| O                               | 0.000001074  | 0.000003070  | 0.000000581  |
| C                               | 0.000001079  | -0.000001140 | -0.000000628 |
| C                               | 0.000001399  | 0.000002711  | 0.000001473  |
| C                               | 0.000000874  | -0.000000447 | -0.000000728 |
| N                               | 0.000000909  | -0.000000368 | -0.000001904 |
| C                               | -0.000002421 | -0.000001179 | 0.000002446  |
| C                               | 0.000000792  | -0.000002814 | 0.000001195  |
| C                               | 0.000002451  | 0.000000700  | 0.000002403  |

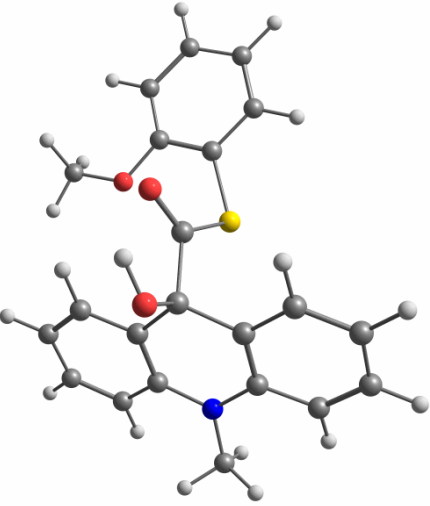

|   |              |              |              |
|---|--------------|--------------|--------------|
| C | 0.000002329  | 0.000000530  | -0.000000785 |
| C | 0.000000419  | 0.000002044  | -0.000000029 |
| C | 0.000000173  | 0.000000539  | 0.000001036  |
| C | -0.000000340 | -0.000003066 | 0.000000802  |
| C | -0.000000275 | -0.000002715 | 0.000000027  |
| C | -0.000000945 | -0.000001778 | -0.000000094 |
| C | 0.000000852  | -0.000002022 | 0.000000904  |
| O | -0.000002000 | 0.000000381  | -0.000001004 |
| C | -0.000000125 | -0.000000264 | 0.000001277  |
| H | 0.000000304  | -0.000000161 | 0.000000462  |
| H | 0.000001180  | 0.000001465  | 0.000000200  |
| H | 0.000002007  | 0.000002510  | 0.000000591  |
| H | 0.000001499  | 0.000001192  | 0.000000124  |
| H | 0.000000588  | -0.000001594 | 0.000001249  |
| H | -0.000000304 | -0.000003040 | 0.000000795  |
| H | -0.000001610 | -0.000003300 | 0.000000886  |
| H | -0.000000995 | -0.000002587 | -0.000000532 |
| H | -0.000000344 | -0.000001948 | 0.000000865  |
| H | -0.000000400 | -0.000001876 | 0.000000184  |
| H | 0.000000130  | -0.000002160 | 0.000001790  |
| H | -0.000000430 | 0.000003229  | -0.000001048 |
| H | -0.000000397 | 0.000003138  | -0.000002309 |
| H | -0.000000426 | 0.000002694  | -0.000000657 |
| H | -0.000001887 | 0.000001672  | -0.000000873 |
| O | 0.000001333  | -0.000006364 | -0.000004920 |
| H | 0.000003357  | -0.000000359 | 0.000001614  |
| C | -0.000000794 | 0.000003257  | 0.000004195  |
| H | -0.000001139 | -0.000001018 | -0.000000496 |
| H | -0.000001125 | -0.000001423 | -0.000000990 |
| H | -0.000001803 | -0.000001162 | -0.000000983 |

| Geom.No              |              |              |              | Atom | X | Y | Z | 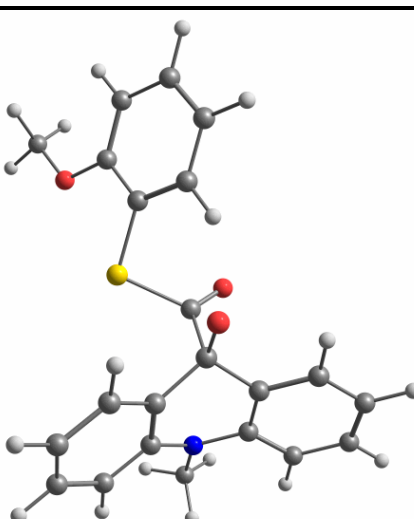 |
|----------------------|--------------|--------------|--------------|------|---|---|---|--------------------------------------------------------------------------------------|
| 7= -1527.82834549 Ha |              |              |              |      |   |   |   |                                                                                      |
| C                    | 0.000000289  | -0.000000065 | -0.000001086 |      |   |   |   |                                                                                      |
| C                    | 0.000006480  | 0.000002773  | 0.000001457  |      |   |   |   |                                                                                      |
| C                    | -0.000001755 | -0.000000921 | -0.000002175 |      |   |   |   |                                                                                      |
| C                    | 0.000000147  | 0.000000188  | -0.000001609 |      |   |   |   |                                                                                      |
| C                    | 0.000000812  | -0.000000151 | 0.000001188  |      |   |   |   |                                                                                      |
| C                    | -0.000001930 | 0.000000076  | -0.000000389 |      |   |   |   |                                                                                      |
| C                    | -0.000028712 | -0.000022825 | -0.000022647 |      |   |   |   |                                                                                      |
| C                    | 0.000002832  | 0.000002678  | 0.000003038  |      |   |   |   |                                                                                      |
| C                    | -0.000001149 | -0.000000850 | -0.000001716 |      |   |   |   |                                                                                      |
| N                    | 0.000000595  | 0.000002017  | 0.000000299  |      |   |   |   |                                                                                      |
| C                    | -0.000000565 | -0.000001611 | 0.000000640  |      |   |   |   |                                                                                      |
| C                    | 0.000000832  | -0.000000262 | -0.000000180 |      |   |   |   |                                                                                      |
| C                    | -0.000001392 | 0.000000207  | -0.000001656 |      |   |   |   |                                                                                      |
| C                    | -0.000000574 | -0.000000774 | 0.000000857  |      |   |   |   |                                                                                      |
| C                    | 0.000007925  | 0.000024193  | 0.000000970  |      |   |   |   |                                                                                      |
| O                    | -0.000002355 | -0.000006478 | 0.000004173  |      |   |   |   |                                                                                      |
| O                    | 0.000019095  | 0.000001229  | 0.000013168  |      |   |   |   |                                                                                      |

|   |              |              |              |
|---|--------------|--------------|--------------|
| C | 0.000000547  | -0.000000475 | -0.000000836 |
| S | -0.000002077 | -0.000000943 | 0.000001619  |
| C | -0.000002783 | 0.000004895  | 0.000002944  |
| C | -0.000004762 | 0.000002357  | -0.000005562 |
| C | 0.000006186  | -0.000004760 | 0.000001830  |
| C | -0.000003135 | 0.000005583  | 0.000006687  |
| C | -0.000004175 | -0.000000704 | -0.000009482 |
| C | 0.000009337  | -0.000004617 | 0.000009453  |
| O | -0.000006213 | 0.000003190  | 0.000001921  |
| H | -0.000000182 | -0.000000387 | -0.000000198 |
| H | -0.000000950 | 0.000000416  | -0.000000388 |
| H | -0.000000273 | -0.000000587 | -0.000000615 |
| H | -0.000000677 | -0.000000583 | -0.000000437 |
| H | -0.000000172 | -0.000000411 | -0.000000315 |
| H | -0.000000477 | 0.000000483  | -0.000000195 |
| H | -0.000000017 | 0.000000483  | -0.000000278 |
| H | -0.000000321 | 0.000000014  | -0.000000411 |
| H | 0.000000039  | -0.000000877 | -0.000000275 |
| H | 0.000000223  | -0.000000189 | -0.000000306 |
| H | -0.000000305 | -0.000000690 | -0.000000179 |
| H | 0.000001167  | 0.000001145  | 0.000001677  |
| H | 0.000000955  | 0.000000734  | 0.000000055  |
| H | -0.000000681 | 0.000000940  | 0.000000263  |
| H | 0.000001921  | 0.000000232  | 0.000001203  |
| C | 0.000004653  | -0.000004577 | -0.000005473 |
| H | 0.000000689  | -0.000000255 | 0.000000135  |
| H | 0.000000348  | 0.000000086  | 0.000000975  |
| H | 0.000000560  | 0.000000070  | 0.000001852  |

| Geom.No                    |              |              |              | 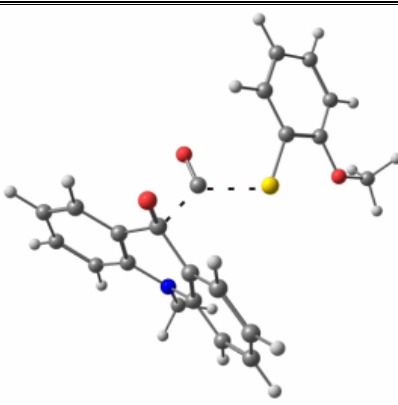 |
|----------------------------|--------------|--------------|--------------|--------------------------------------------------------------------------------------|
| VIII-TS= -1527.82296751 Ha |              |              |              |                                                                                      |
| Atom                       | X            | Y            | Z            |                                                                                      |
| C                          | -0.000002454 | 0.000001144  | 0.000000134  |                                                                                      |
| C                          | 0.000000491  | -0.000001682 | -0.000002126 |                                                                                      |
| C                          | -0.000000965 | -0.000001746 | -0.000003369 |                                                                                      |
| C                          | -0.000002379 | -0.000001236 | -0.000002306 |                                                                                      |
| C                          | -0.000002581 | 0.000000452  | -0.000002231 |                                                                                      |
| C                          | -0.000002152 | 0.000002125  | -0.000001349 |                                                                                      |
| S                          | -0.000001815 | 0.000001326  | -0.000002881 |                                                                                      |
| C                          | -0.000003522 | 0.000002138  | -0.000000505 |                                                                                      |
| O                          | 0.000000972  | -0.000002737 | -0.000000809 |                                                                                      |
| O                          | -0.000002683 | 0.000004642  | -0.000000413 |                                                                                      |
| C                          | -0.000002954 | 0.000003747  | -0.000000620 |                                                                                      |
| C                          | -0.000000478 | -0.000003737 | 0.000005815  |                                                                                      |
| C                          | 0.000003534  | -0.000001867 | -0.000001461 |                                                                                      |
| C                          | 0.000002206  | -0.000000655 | 0.000001163  |                                                                                      |
| N                          | 0.000002704  | 0.000000083  | -0.000000061 |                                                                                      |
| C                          | -0.000000218 | 0.000000401  | 0.000001350  |                                                                                      |
| C                          | 0.000000072  | -0.000001176 | -0.000001869 |                                                                                      |
| C                          | 0.000003803  | -0.000002048 | 0.000002266  |                                                                                      |
| C                          | 0.000004372  | -0.000003078 | 0.000002151  |                                                                                      |

|   |              |              |              |
|---|--------------|--------------|--------------|
| C | 0.000004071  | -0.000004443 | 0.000000875  |
| C | 0.000002650  | -0.000004191 | 0.000001044  |
| C | 0.000000023  | 0.000001839  | 0.000001037  |
| C | -0.000001342 | 0.000001521  | -0.000000061 |
| C | -0.000001966 | 0.000000755  | -0.000001226 |
| C | -0.000001190 | -0.000000422 | -0.000001099 |
| O | 0.000000488  | -0.000003097 | -0.000001519 |
| C | 0.000002192  | 0.000001353  | 0.000003650  |
| H | -0.000002798 | 0.000000946  | -0.000001889 |
| H | -0.000001690 | -0.000001273 | -0.000002695 |
| H | -0.000001748 | 0.000002800  | 0.000000209  |
| H | 0.000000360  | 0.000002507  | 0.000001650  |
| H | 0.000004375  | -0.000000927 | 0.000003363  |
| H | 0.000002175  | -0.000004583 | -0.000001062 |
| H | 0.000004571  | -0.000005490 | 0.000000974  |
| H | 0.000005648  | -0.000003503 | 0.000002966  |
| H | 0.000002752  | 0.000001112  | 0.000003410  |
| H | 0.000001676  | 0.000002541  | 0.000002608  |
| H | 0.000002573  | 0.000001097  | 0.000003185  |
| H | -0.000003156 | 0.000002885  | -0.000000912 |
| H | -0.000002447 | 0.000000579  | -0.000001995 |
| H | -0.000001660 | -0.000001798 | -0.000002587 |
| H | -0.000001708 | -0.000000956 | -0.000002613 |
| H | -0.000003363 | 0.000005153  | 0.000000029  |
| H | -0.000002688 | 0.000004602  | 0.000000578  |
| H | -0.000003751 | 0.000004896  | -0.000000798 |

| R <sub>2</sub> =H, R <sub>4</sub> = NO <sub>2</sub> R <sub>6</sub> =H R <sub>2'</sub> =H |              |              |              |
|------------------------------------------------------------------------------------------|--------------|--------------|--------------|
| Geom.No                                                                                  |              |              |              |
| 1=-1542.34610948 Ha                                                                      |              |              |              |
| Atom                                                                                     | X            | Y            | Z            |
| C                                                                                        | 0.000000222  | -0.000005670 | -0.000010069 |
| C                                                                                        | 0.000005789  | 0.000001850  | 0.000002651  |
| C                                                                                        | 0.000005558  | -0.000000324 | 0.000000149  |
| C                                                                                        | -0.000007683 | -0.000009180 | -0.000008521 |
| C                                                                                        | -0.000020287 | -0.000002303 | 0.000004942  |
| C                                                                                        | -0.000002699 | 0.000005418  | 0.000009166  |
| S                                                                                        | -0.000003077 | 0.000006642  | -0.000002458 |
| C                                                                                        | -0.000007132 | -0.000014429 | 0.000007558  |
| O                                                                                        | 0.000001638  | 0.000003516  | -0.000000306 |
| C                                                                                        | 0.000003437  | 0.000004427  | -0.000006131 |
| C                                                                                        | 0.000000636  | 0.000002224  | 0.000002033  |
| C                                                                                        | -0.000002298 | 0.000002141  | 0.000003899  |
| N                                                                                        | -0.000000611 | 0.000001891  | -0.000002650 |
| C                                                                                        | 0.000000149  | 0.000002156  | 0.000000836  |
| C                                                                                        | 0.000006603  | -0.000001119 | 0.000001238  |
| C                                                                                        | -0.000001005 | -0.000002139 | -0.000001620 |
| C                                                                                        | -0.000001763 | -0.000000041 | 0.000001923  |
| C                                                                                        | -0.000000845 | 0.000000645  | 0.000000971  |
| C                                                                                        | 0.000000551  | 0.000000854  | -0.000001083 |
| C                                                                                        | 0.000003241  | -0.000000682 | 0.000004925  |

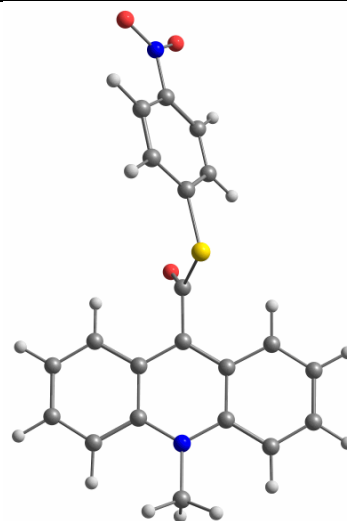

|   |              |              |              |
|---|--------------|--------------|--------------|
| C | 0.000000383  | 0.000001454  | 0.000001826  |
| C | -0.000001480 | 0.000002009  | -0.000000231 |
| C | -0.000001830 | -0.000000682 | 0.000001012  |
| C | -0.000001851 | 0.000002947  | 0.000000222  |
| H | -0.000000114 | 0.000001093  | 0.000001092  |
| H | -0.000000490 | 0.000000078  | 0.000001117  |
| H | -0.000000142 | -0.000000722 | 0.000000446  |
| H | -0.000001672 | -0.000000698 | 0.000000385  |
| H | 0.000000330  | 0.000000999  | 0.000000014  |
| H | 0.000000945  | 0.000001145  | -0.000000186 |
| H | 0.000001183  | 0.000002066  | 0.000000998  |
| H | 0.000003356  | 0.000001786  | 0.000000629  |
| H | 0.000000192  | 0.000000278  | 0.000002045  |
| H | 0.000000581  | 0.000001712  | 0.000002643  |
| H | -0.000001534 | 0.000004681  | 0.000000023  |
| H | 0.000002504  | -0.000000125 | -0.000003064 |
| H | -0.000001566 | 0.000000267  | 0.000001838  |
| N | 0.000040498  | -0.000003280 | -0.000015698 |
| H | -0.000001899 | -0.000004351 | -0.000003866 |
| H | 0.000001774  | -0.000002003 | -0.000000011 |
| O | -0.000011805 | -0.000001915 | 0.000003888  |
| O | -0.000007786 | -0.000002617 | -0.000002578 |

| Geom.No             |              |              |              | 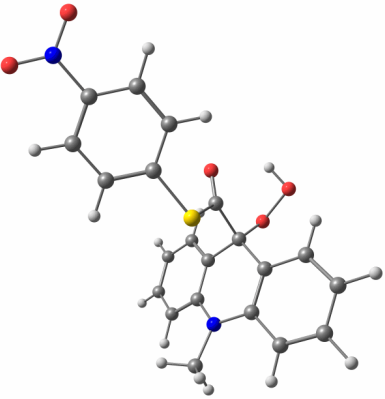 |
|---------------------|--------------|--------------|--------------|--------------------------------------------------------------------------------------|
| 2--1693.51451378 Ha |              |              |              |                                                                                      |
| Atom                | X            | Y            | Z            |                                                                                      |
| C                   | 0.000000437  | 0.000002030  | 0.000001399  |                                                                                      |
| C                   | -0.000001054 | 0.000001277  | -0.000000436 |                                                                                      |
| C                   | -0.000001294 | -0.000002474 | -0.000000170 |                                                                                      |
| C                   | 0.000001348  | 0.000000919  | -0.000002212 |                                                                                      |
| C                   | 0.000000408  | 0.000000694  | -0.000000144 |                                                                                      |
| C                   | -0.000001999 | -0.000000317 | 0.000000545  |                                                                                      |
| C                   | -0.000006050 | 0.000003146  | 0.000001834  |                                                                                      |
| C                   | 0.000003846  | -0.000000525 | 0.000002413  |                                                                                      |
| C                   | 0.000000311  | -0.000001407 | -0.000001928 |                                                                                      |
| N                   | -0.000001250 | 0.000001658  | 0.000004230  |                                                                                      |
| C                   | 0.000002757  | -0.000002517 | -0.000002977 |                                                                                      |
| C                   | 0.000003540  | -0.000001677 | 0.000001614  |                                                                                      |
| C                   | 0.000000247  | -0.000001313 | 0.000000003  |                                                                                      |
| C                   | 0.000001989  | -0.000000424 | -0.000001158 |                                                                                      |
| C                   | -0.000000387 | -0.000008110 | -0.000002486 |                                                                                      |
| O                   | 0.000003708  | 0.000004351  | 0.000005189  |                                                                                      |
| O                   | 0.000003011  | 0.000001334  | -0.000000383 |                                                                                      |
| O                   | 0.000002864  | 0.000000235  | 0.000001431  |                                                                                      |
| C                   | 0.000000215  | -0.000000882 | 0.000002940  |                                                                                      |
| S                   | -0.000001630 | 0.000002576  | -0.000004799 |                                                                                      |
| C                   | -0.000005671 | 0.000000820  | -0.000006002 |                                                                                      |
| C                   | 0.000003080  | 0.000000858  | 0.000004088  |                                                                                      |
| C                   | 0.000001816  | 0.000001727  | -0.000005348 |                                                                                      |
| C                   | -0.000003360 | -0.000010298 | -0.000008898 |                                                                                      |
| C                   | 0.000001461  | 0.000007159  | 0.000002432  |                                                                                      |

|   |              |              |              |
|---|--------------|--------------|--------------|
| C | -0.000008286 | -0.000002822 | 0.000001462  |
| H | -0.000000618 | -0.000000102 | -0.000002155 |
| H | -0.000000482 | 0.000000166  | -0.000000314 |
| H | -0.000000955 | 0.000001299  | 0.000000078  |
| H | -0.000001204 | 0.000001271  | 0.000000146  |
| H | 0.000000415  | -0.000000531 | 0.000001733  |
| H | 0.000001419  | -0.000001018 | 0.000001320  |
| H | 0.000002241  | -0.000002352 | 0.000000887  |
| H | 0.000005094  | -0.000003598 | -0.000000026 |
| H | -0.000000824 | -0.000002369 | 0.000001548  |
| H | 0.000001160  | -0.000002034 | -0.000000689 |
| H | -0.000001206 | -0.000000285 | 0.000002678  |
| H | -0.000002909 | 0.000000067  | -0.000002024 |
| H | -0.000003741 | -0.000001786 | -0.000002241 |
| N | -0.000009197 | -0.000018259 | 0.000000359  |
| H | -0.000001961 | 0.000000351  | -0.000001531 |
| H | 0.000001550  | -0.000000178 | 0.000000816  |
| H | 0.000003033  | 0.000000438  | 0.000002890  |
| O | 0.000009856  | 0.000012302  | 0.000001707  |
| O | -0.000001727 | 0.000020600  | 0.000002178  |

| Geom.No<br>4=-834.419684305 Ha |              |              |              |
|--------------------------------|--------------|--------------|--------------|
| Atom                           | X            | Y            | Z            |
| C                              | 0.000048163  | -0.000000000 | -0.000067563 |
| C                              | -0.000000018 | 0.000000000  | 0.000029121  |
| C                              | 0.000007243  | 0.000000000  | 0.000003015  |
| C                              | 0.000057919  | 0.000000000  | 0.000015703  |
| C                              | 0.000003620  | 0.000000000  | 0.000024608  |
| C                              | -0.000081027 | 0.000000000  | 0.000017390  |
| H                              | 0.000000726  | 0.000000000  | 0.000000802  |
| H                              | -0.000014509 | 0.000000000  | -0.000000926 |
| N                              | -0.000028024 | -0.000000000 | -0.000016886 |
| H                              | 0.000007317  | 0.000000000  | 0.000003904  |
| H                              | 0.000001115  | -0.000000000 | -0.000003308 |
| S                              | -0.000019255 | -0.000000000 | -0.000010800 |
| O                              | 0.000007622  | -0.000000000 | -0.000006854 |
| O                              | 0.000009108  | 0.000000000  | 0.000011793  |

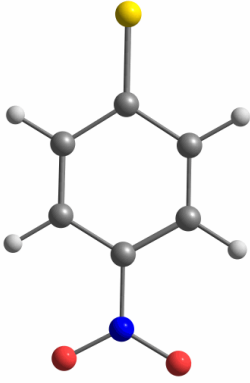

| Geom.No<br>6= -1618.38613968 Ha |   |   |   |
|---------------------------------|---|---|---|
| Atom                            | X | Y | Z |
|                                 |   |   |   |



|   |              |              |              |
|---|--------------|--------------|--------------|
| C | 0.000001527  | -0.000001374 | 0.000001171  |
| C | 0.000001762  | -0.000001170 | 0.000001287  |
| C | 0.000000986  | -0.000002428 | 0.000000353  |
| C | 0.000000031  | 0.000000042  | 0.000003536  |
| C | 0.000001578  | -0.000000573 | 0.000001783  |
| C | 0.000003184  | -0.000001405 | 0.000001143  |
| C | -0.000001536 | 0.000006998  | -0.000005429 |
| C | -0.000001728 | 0.000000100  | 0.000000311  |
| C | -0.000001505 | -0.000000135 | 0.000000348  |
| N | -0.000000792 | 0.000003449  | 0.000002020  |
| C | -0.000002308 | 0.000001668  | -0.000000519 |
| C | -0.000003044 | 0.000001606  | -0.000000463 |
| C | -0.000002328 | 0.000001136  | -0.000001301 |
| C | -0.000001237 | 0.000000622  | -0.000001428 |
| C | 0.000016537  | -0.000022716 | 0.000007973  |
| O | -0.000010935 | 0.000003128  | -0.000007339 |
| O | 0.000003411  | -0.000000357 | 0.000000243  |
| C | -0.000002789 | -0.000000501 | 0.000001291  |
| S | -0.000002783 | 0.000013231  | -0.000002664 |
| C | -0.000005659 | -0.000007485 | 0.000003236  |
| C | 0.000005873  | 0.000005917  | -0.000004453 |
| C | -0.000001256 | -0.000003040 | -0.000001433 |
| C | 0.000004496  | 0.000003802  | -0.000000966 |
| C | 0.000000652  | -0.000000080 | -0.000000625 |
| C | 0.000004329  | 0.000002146  | 0.000002547  |
| H | 0.000001743  | -0.000002883 | 0.000000439  |
| H | -0.000002021 | 0.000001090  | -0.000001076 |
| N | 0.000000151  | -0.000003026 | -0.000001638 |
| O | -0.000000690 | 0.000000408  | -0.000001981 |
| O | 0.000000802  | -0.000002364 | -0.000001071 |
| H | -0.000002330 | 0.000001666  | 0.000001059  |
| H | -0.000003762 | 0.000002110  | -0.000000429 |
| H | -0.000003116 | 0.000001768  | -0.000002176 |
| H | -0.000001015 | 0.000000515  | -0.000002237 |
| H | 0.000002207  | -0.000001075 | -0.000000381 |
| H | 0.000003090  | -0.000001642 | 0.000001384  |
| H | 0.000002219  | -0.000001080 | 0.000003159  |
| H | 0.000000649  | 0.000000250  | 0.000003273  |
| H | -0.000002280 | 0.000001041  | 0.000001929  |
| H | -0.000001329 | 0.000000959  | 0.000002642  |
| H | -0.000000701 | 0.000000885  | 0.000001644  |
| H | -0.000001349 | -0.000000262 | -0.000001115 |
| H | 0.000002857  | -0.000000951 | -0.000001515 |
| H | -0.000001594 | 0.000000005  | -0.000002530 |

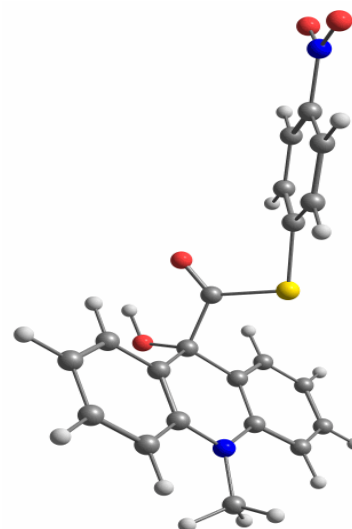

| Geom.No             |   |   |   |  |
|---------------------|---|---|---|--|
| 7=-1617.82381048 Ha |   |   |   |  |
| Atom                | X | Y | Z |  |

|   |              |              |              |
|---|--------------|--------------|--------------|
| C | 0.000005532  | 0.000002709  | 0.000004115  |
| C | 0.000002578  | 0.000012129  | 0.000004692  |
| C | 0.000001559  | 0.000002045  | 0.000001592  |
| C | 0.000002392  | 0.000004359  | 0.000002114  |
| C | 0.000006586  | 0.000006290  | 0.000006889  |
| C | 0.000002060  | 0.000006888  | 0.000001288  |
| C | -0.000045599 | -0.000075026 | -0.000068271 |
| C | 0.000001865  | 0.000006255  | 0.000006932  |
| C | -0.000003246 | -0.000000254 | -0.000000831 |
| N | -0.000000415 | 0.000005013  | 0.000002273  |
| C | -0.000002624 | -0.000003199 | 0.000001868  |
| C | -0.000001313 | -0.000002908 | -0.000001850 |
| C | -0.000002719 | -0.000002631 | -0.000004778 |
| C | 0.000001863  | 0.000000017  | -0.000006643 |
| C | -0.000017062 | 0.000060468  | 0.000047866  |
| O | 0.000006292  | -0.000001458 | -0.000003447 |
| O | 0.000047750  | 0.000001682  | 0.000029005  |
| C | -0.000000047 | 0.000001262  | 0.000004505  |
| S | 0.000001563  | 0.000001514  | -0.000017259 |
| C | 0.000007557  | 0.000002598  | -0.000005698 |
| C | -0.000005814 | 0.000004962  | -0.000001699 |
| C | 0.000006594  | -0.000013819 | -0.000015659 |
| C | -0.000003028 | 0.000000961  | 0.000004873  |
| C | -0.000013341 | 0.000007223  | 0.000006855  |
| C | 0.000002708  | -0.000014677 | 0.000000263  |
| H | -0.000004476 | -0.000009581 | 0.000002794  |
| H | -0.000000951 | -0.000005360 | -0.000005457 |
| H | -0.000000647 | -0.000002574 | -0.000003341 |
| H | -0.000003116 | -0.000004371 | -0.000003096 |
| H | -0.000002828 | -0.000001167 | 0.000000472  |
| H | 0.000001906  | 0.000005610  | 0.000005965  |
| H | 0.000006146  | 0.000004446  | -0.000002069 |
| H | 0.000007139  | 0.000006835  | 0.000002638  |
| H | 0.000005004  | 0.000007890  | 0.000005406  |
| H | -0.000002243 | 0.000002792  | 0.000006516  |
| H | -0.000003031 | 0.000000425  | 0.000004191  |
| H | -0.000001178 | 0.000001597  | 0.000004515  |
| H | -0.000007787 | -0.000006016 | -0.000011566 |
| N | 0.000009598  | -0.000010274 | -0.000002402 |
| H | -0.000002837 | 0.000009248  | 0.000000403  |
| H | 0.000004726  | -0.000010900 | 0.000003780  |
| O | -0.000010029 | 0.000012937  | 0.000014343  |
| O | 0.000002915  | -0.000013937 | -0.000022084 |

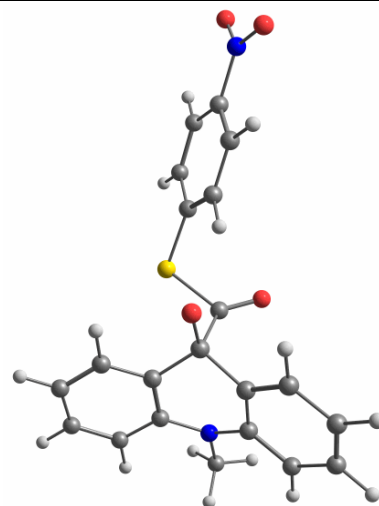

| Geom.No                    |   |   |   |  |
|----------------------------|---|---|---|--|
| VIII-TS= -1617.82071294 Ha |   |   |   |  |
| Atom                       | X | Y | Z |  |

|   |              |              |              |
|---|--------------|--------------|--------------|
| C | 0.000004906  | -0.000007499 | -0.000000753 |
| C | -0.000005837 | 0.000017288  | -0.000000229 |
| C | -0.000003422 | -0.000000153 | 0.000004746  |
| C | 0.000003343  | 0.000003376  | 0.000004467  |
| C | 0.000003139  | 0.000003443  | 0.000001614  |
| C | 0.000001443  | 0.000000570  | 0.000001928  |
| C | 0.000002847  | -0.000011317 | 0.000006682  |
| C | 0.000007843  | -0.000008067 | 0.000009928  |
| C | -0.000002820 | -0.000001883 | -0.000000487 |
| N | 0.000003921  | 0.000004144  | 0.000003415  |
| C | 0.000002881  | 0.000001763  | 0.000001947  |
| C | 0.000008141  | 0.000002337  | -0.000019040 |
| C | -0.000011499 | 0.000000723  | 0.000003634  |
| C | -0.000006851 | 0.000000536  | -0.000004872 |
| O | -0.000000682 | -0.000003164 | -0.000002983 |
| C | -0.000000871 | 0.000002713  | -0.000000541 |
| C | 0.000003913  | 0.000004439  | 0.000001384  |
| O | -0.000006424 | 0.000002066  | -0.000001412 |
| S | -0.000005847 | 0.000002487  | -0.000001970 |
| C | -0.000006233 | 0.000005344  | -0.000001440 |
| C | -0.000002868 | 0.000002316  | 0.000001597  |
| C | 0.000000706  | -0.000003885 | -0.000000888 |
| C | 0.000004592  | -0.000004698 | -0.000000169 |
| C | 0.000004334  | -0.000003599 | 0.000001546  |
| C | 0.000003388  | -0.000000529 | 0.000000335  |
| N | 0.000005247  | 0.000000698  | -0.000005297 |
| O | 0.000000645  | -0.000006994 | -0.000002955 |
| O | 0.000001718  | 0.000007500  | 0.000002537  |
| H | 0.000003098  | -0.000002673 | 0.000000771  |
| H | 0.000006558  | -0.000003583 | 0.000002170  |
| H | 0.000004596  | 0.000000668  | 0.000001840  |
| H | 0.000004245  | -0.000006347 | 0.000000252  |
| H | -0.000000282 | -0.000006677 | -0.000000531 |
| H | -0.000007252 | -0.000000569 | -0.000003393 |
| H | -0.000002386 | 0.000005039  | -0.000000520 |
| H | -0.000005826 | 0.000006394  | -0.000000430 |
| H | -0.000007831 | 0.000004140  | -0.000002956 |
| H | -0.000004756 | -0.000003221 | -0.000002264 |
| H | -0.000001931 | -0.000005393 | -0.000003052 |
| H | -0.000004586 | -0.000004202 | -0.000001977 |
| H | 0.000003287  | -0.000001288 | 0.000001082  |
| H | 0.000001714  | 0.000004818  | 0.000002074  |
| H | 0.000001694  | 0.000002939  | 0.000004209  |

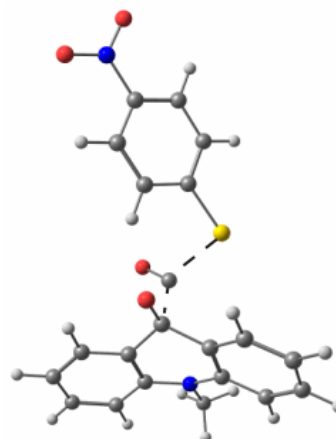

| R <sub>2</sub> =CH <sub>3</sub> , R <sub>4</sub> =NO <sub>2</sub> , R <sub>6</sub> =CH <sub>3</sub> , R <sub>2'</sub> =H |   |   |   |  |
|--------------------------------------------------------------------------------------------------------------------------|---|---|---|--|
| Geom.No                                                                                                                  |   |   |   |  |
| 1=-1620.98688253 Ha                                                                                                      |   |   |   |  |
| Atom                                                                                                                     | X | Y | Z |  |

|   |              |              |              |
|---|--------------|--------------|--------------|
| C | 0.000002867  | -0.000002847 | 0.000000737  |
| C | -0.000003737 | -0.000002437 | -0.000002344 |
| C | 0.000000824  | -0.000000122 | 0.000001567  |
| C | 0.000001681  | 0.000001064  | 0.000004030  |
| C | 0.000000199  | -0.000002012 | 0.000001243  |
| C | 0.000001582  | -0.000003443 | -0.000001195 |
| S | 0.000000204  | 0.000009199  | 0.000001350  |
| C | 0.000007636  | -0.000031971 | -0.000004779 |
| O | -0.000002936 | 0.000013362  | 0.000002883  |
| C | -0.000002177 | 0.000007609  | 0.000006408  |
| C | -0.000001047 | 0.000002969  | -0.000004296 |
| C | 0.000000732  | 0.000001608  | -0.000002793 |
| N | -0.000000058 | 0.000001022  | 0.000000611  |
| C | -0.000003650 | 0.000002636  | -0.000000446 |
| C | -0.000003578 | 0.000001978  | -0.000001513 |
| C | 0.000002056  | -0.000002594 | 0.000000159  |
| C | 0.000000509  | -0.000001131 | -0.000001258 |
| C | 0.000000731  | -0.000000525 | -0.000002213 |
| C | -0.000000258 | -0.000000094 | -0.000000252 |
| C | -0.000002447 | 0.000002598  | 0.000000385  |
| C | -0.000003169 | 0.000004117  | 0.000000722  |
| C | -0.000000642 | 0.000002976  | 0.000000287  |
| C | 0.000001881  | -0.000000849 | 0.000001479  |
| C | 0.000000143  | 0.000001426  | -0.000002845 |
| H | -0.000000471 | 0.000000775  | -0.000001729 |
| H | 0.000000791  | -0.000000920 | -0.000002580 |
| H | 0.000001488  | -0.000001713 | -0.000001889 |
| H | 0.000000389  | -0.000001467 | -0.000000968 |
| H | -0.000001230 | 0.000001482  | 0.000001669  |
| H | -0.000002290 | 0.000002299  | 0.000002502  |
| H | -0.000002859 | 0.000003609  | 0.000001442  |
| H | -0.000001969 | 0.000003438  | 0.000000781  |
| H | -0.000001406 | 0.000001883  | -0.000002316 |
| H | -0.000001329 | 0.000002220  | -0.000000539 |
| H | -0.000001836 | 0.000003103  | -0.000001041 |
| C | 0.000000830  | 0.000001635  | 0.000005362  |
| H | 0.000000772  | -0.000000972 | -0.000000067 |
| N | 0.000011076  | -0.000002305 | -0.000003586 |
| H | 0.000002398  | -0.000002979 | 0.000001272  |
| C | -0.000003541 | -0.000005628 | -0.000002482 |
| O | -0.000001827 | -0.000001363 | 0.000008443  |
| O | -0.000005610 | -0.000004052 | 0.000001025  |
| H | 0.000002027  | -0.000003058 | 0.000001089  |
| H | 0.000003572  | 0.000000123  | 0.000001299  |
| H | 0.000004524  | -0.000002071 | -0.000000195 |
| H | -0.000001168 | 0.000000604  | -0.000000668 |
| H | 0.000000805  | -0.000000229 | -0.000001992 |
| H | -0.000000483 | 0.000001048  | -0.000002762 |

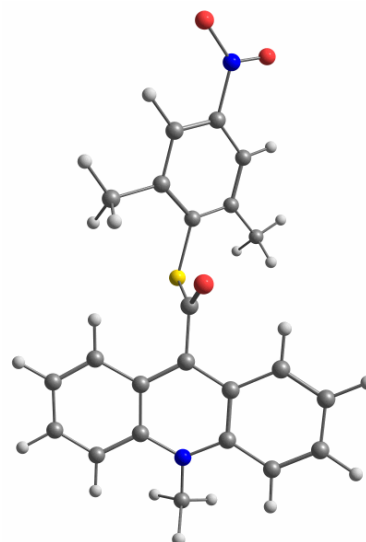

**Geom.No**  
**2=-1772.15500104 Ha**

| Atom | X            | Y            | Z            |
|------|--------------|--------------|--------------|
| C    | 0.000000543  | -0.000001159 | 0.000000292  |
| C    | 0.000006239  | -0.000000203 | -0.000000190 |
| C    | -0.000003592 | -0.000005210 | 0.000003222  |
| C    | 0.000001336  | -0.000000722 | -0.000002534 |
| C    | 0.000000519  | -0.000001821 | 0.000000539  |
| C    | -0.000001417 | -0.000000982 | -0.000001380 |
| C    | -0.000006442 | -0.000004012 | -0.000009329 |
| C    | 0.000003908  | -0.000000023 | 0.000007767  |
| C    | 0.000002206  | -0.000005376 | -0.000005930 |
| N    | -0.000000594 | 0.000010980  | -0.000003463 |
| C    | -0.000000081 | 0.000001112  | 0.000001688  |
| C    | 0.000003973  | 0.000000710  | -0.000000894 |
| C    | 0.000000888  | 0.000000239  | -0.000001165 |
| C    | -0.000001151 | 0.000001191  | 0.000000476  |
| C    | -0.000002064 | 0.000011895  | -0.000003667 |
| O    | 0.000002010  | -0.000002504 | 0.000002458  |
| O    | 0.000007779  | -0.000000987 | 0.000001014  |
| O    | -0.000003466 | 0.000002679  | -0.000002206 |
| C    | 0.000004304  | -0.000004994 | 0.000001143  |
| S    | 0.000006479  | -0.000006262 | 0.000000012  |
| C    | -0.000000501 | -0.000000784 | -0.000001947 |
| C    | 0.000005040  | 0.000015944  | 0.000010830  |
| C    | -0.000005964 | -0.000012884 | -0.000004995 |
| C    | 0.000012116  | 0.000023533  | 0.000011781  |
| C    | -0.000005372 | 0.000000231  | 0.000001603  |
| C    | -0.000012196 | 0.000005751  | 0.000003499  |
| H    | 0.000001204  | -0.000002299 | -0.000000009 |
| H    | 0.000000427  | -0.000002097 | -0.000001001 |
| H    | 0.000000740  | -0.000001726 | -0.000000480 |
| H    | 0.000000210  | -0.000000760 | -0.000000343 |
| H    | 0.000002527  | 0.000000648  | 0.000000937  |
| H    | 0.000002151  | 0.000001993  | 0.000000163  |
| H    | 0.000001872  | 0.000000176  | -0.000000247 |
| H    | 0.000001834  | -0.000000792 | -0.000000372 |
| H    | 0.000000574  | -0.000000957 | -0.000001465 |
| H    | 0.000000272  | -0.000001892 | -0.000001168 |
| H    | 0.000000669  | -0.000001116 | -0.000000737 |
| C    | -0.000012708 | -0.000004021 | -0.000000169 |
| H    | -0.000001600 | 0.000000131  | 0.000001157  |
| N    | -0.000010069 | -0.000021667 | -0.000011282 |
| H    | -0.000002448 | 0.000000625  | -0.000000042 |
| C    | 0.000012271  | -0.000004696 | -0.000004262 |
| H    | -0.000001257 | 0.000000936  | 0.000000943  |
| O    | -0.000010560 | 0.000008219  | 0.000007000  |
| O    | 0.000005846  | 0.000003275  | 0.000001005  |
| H    | -0.000003391 | -0.000001887 | 0.000000579  |
| H    | -0.000002199 | 0.000000994  | 0.000002319  |
| H    | -0.000000352 | -0.000000501 | -0.000000029 |
| H    | -0.000001275 | 0.000001673  | -0.000000380 |
| H    | 0.000001736  | -0.000001246 | -0.000000431 |

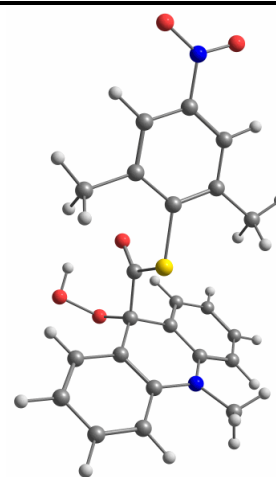

|   |              |             |              |
|---|--------------|-------------|--------------|
| H | -0.000000970 | 0.000000645 | -0.000000308 |
|---|--------------|-------------|--------------|

| Geom.No<br>4= -913.060667296 Ha |              |              |              |
|---------------------------------|--------------|--------------|--------------|
| Atom                            | X            | Y            | Z            |
| C                               | 0.000010771  | -0.000000000 | -0.000014502 |
| C                               | 0.000004752  | -0.000000000 | 0.000068237  |
| C                               | 0.000001675  | -0.000000000 | -0.000034361 |
| C                               | -0.000023535 | 0.000000000  | -0.000015308 |
| C                               | -0.000014432 | 0.000000000  | 0.000032931  |
| C                               | 0.000038178  | 0.000000000  | -0.000013598 |
| C                               | 0.000036581  | -0.000000000 | -0.000030807 |
| S                               | -0.000001648 | -0.000000000 | 0.000005860  |
| C                               | 0.000015682  | 0.000000000  | 0.000007730  |
| N                               | 0.000003931  | -0.000000000 | -0.000011827 |
| O                               | 0.000000965  | -0.000000000 | 0.000044629  |
| O                               | -0.000013317 | -0.000000000 | -0.000015782 |
| H                               | -0.000004762 | -0.000000000 | 0.000004805  |
| H                               | -0.000045135 | -0.000000000 | -0.000024251 |
| H                               | -0.000003185 | 0.000000000  | -0.000004171 |
| H                               | 0.000002781  | 0.000007661  | -0.000019079 |
| H                               | 0.000002781  | -0.000007661 | -0.000019079 |
| H                               | -0.000001997 | 0.000000000  | 0.000021960  |
| H                               | -0.000005043 | 0.000001879  | 0.000008305  |
| H                               | -0.000005043 | -0.000001879 | 0.000008305  |

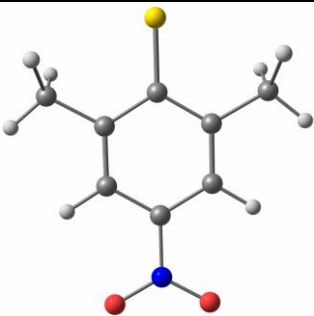

| Geom.No<br>6= -1697.02689959 Ha |              |              |              |
|---------------------------------|--------------|--------------|--------------|
| Atom                            | X            | Y            | Z            |
| C                               | -0.000004515 | -0.000002453 | -0.000006064 |
| C                               | 0.000000314  | -0.000003155 | -0.000017003 |
| C                               | -0.000014619 | 0.000002914  | 0.000008839  |
| C                               | 0.000012974  | 0.000003917  | -0.000000388 |
| C                               | -0.000034913 | -0.000000977 | 0.000003740  |
| C                               | 0.000008159  | 0.000003982  | -0.000003318 |
| S                               | 0.000006312  | 0.000015041  | 0.000011198  |
| C                               | -0.000014607 | -0.000025871 | -0.000002110 |
| O                               | 0.000003785  | 0.000013401  | -0.000002082 |
| C                               | 0.000024708  | -0.000019379 | 0.000013298  |
| C                               | 0.000003815  | -0.000003453 | 0.000001811  |
| C                               | 0.000001440  | 0.000005997  | 0.000005437  |
| N                               | -0.000015940 | -0.000014963 | 0.000009903  |
| C                               | -0.000004255 | 0.000006394  | 0.000004900  |
| C                               | -0.000010780 | 0.000001134  | -0.000021036 |
| C                               | 0.000001704  | -0.000000929 | -0.000002760 |
| C                               | -0.000001348 | -0.000000585 | 0.000003116  |
| C                               | 0.000008321  | -0.000005889 | 0.000000012  |
| C                               | -0.000003580 | -0.000003059 | -0.000006829 |

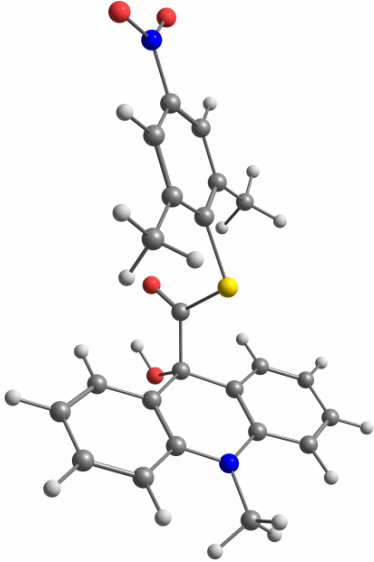

|   |              |              |              |
|---|--------------|--------------|--------------|
| C | -0.00000661  | 0.00000254   | 0.00001323   |
| C | 0.00001770   | -0.00000620  | -0.00001140  |
| C | -0.000005122 | 0.000007663  | 0.000001100  |
| C | 0.000002789  | -0.000001236 | 0.000008816  |
| O | -0.000011434 | 0.000019878  | -0.000002058 |
| C | 0.000016833  | 0.000004501  | 0.000000935  |
| H | 0.000005075  | -0.000004586 | 0.000004674  |
| H | 0.000001732  | -0.000004297 | 0.000000107  |
| H | 0.000003402  | -0.000002893 | -0.000003117 |
| H | -0.000000036 | -0.000001925 | -0.000004739 |
| H | 0.000000117  | 0.000003663  | -0.000001433 |
| H | -0.000001876 | 0.000002869  | 0.000002710  |
| H | -0.000001398 | 0.000002947  | 0.000004523  |
| H | 0.000003673  | 0.000000363  | -0.000005748 |
| H | -0.000000486 | -0.000002576 | 0.000003057  |
| H | 0.000002124  | -0.000001158 | 0.000004257  |
| H | 0.000002482  | -0.000002471 | 0.000012912  |
| C | 0.000008063  | -0.000012653 | -0.000000385 |
| H | -0.000000841 | -0.000001465 | -0.000002071 |
| N | 0.000026192  | 0.000004939  | -0.000012460 |
| H | -0.000001116 | 0.000001800  | -0.000002676 |
| C | -0.000004250 | 0.000002532  | 0.000008313  |
| H | -0.000001695 | -0.000001267 | 0.000000009  |
| O | -0.000006522 | -0.000000665 | -0.000002401 |
| O | -0.000005483 | -0.000001624 | -0.000001393 |
| H | -0.000002744 | 0.000001233  | -0.000003781 |
| H | -0.000002097 | 0.000003740  | -0.000003872 |
| H | 0.000003005  | 0.000006204  | -0.000001504 |
| H | 0.000001442  | 0.000000482  | -0.000002028 |
| H | 0.000000638  | 0.000002521  | -0.000000836 |
| H | -0.000000548 | 0.000001781  | -0.000001761 |

| Geom.No             |              |              |              | Atom | X | Y | Z | 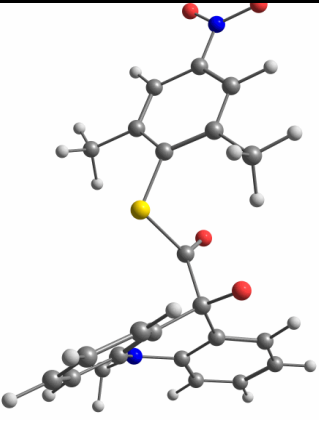 |
|---------------------|--------------|--------------|--------------|------|---|---|---|---------------------------------------------------------------------------------------|
| 7=-1696.46324230 Ha |              |              |              |      |   |   |   |                                                                                       |
| C                   | 0.000002583  | 0.000005008  | 0.000000891  |      |   |   |   |                                                                                       |
| C                   | -0.000000168 | 0.000003525  | 0.000000635  |      |   |   |   |                                                                                       |
| C                   | 0.000001564  | 0.000003954  | 0.000004090  |      |   |   |   |                                                                                       |
| C                   | 0.000000491  | 0.000005087  | 0.000004332  |      |   |   |   |                                                                                       |
| C                   | 0.000002131  | 0.000006982  | 0.000002558  |      |   |   |   |                                                                                       |
| C                   | 0.000005563  | 0.000007106  | 0.000002294  |      |   |   |   |                                                                                       |
| C                   | 0.000012843  | 0.000002181  | 0.000005979  |      |   |   |   |                                                                                       |
| C                   | -0.000001629 | -0.000000949 | -0.000004765 |      |   |   |   |                                                                                       |
| C                   | 0.000001791  | 0.000000957  | -0.000000666 |      |   |   |   |                                                                                       |
| N                   | -0.000000596 | -0.000001319 | -0.000000058 |      |   |   |   |                                                                                       |
| C                   | -0.000000269 | -0.000000892 | -0.000001642 |      |   |   |   |                                                                                       |
| C                   | -0.000000907 | -0.000003278 | -0.000003257 |      |   |   |   |                                                                                       |
| C                   | 0.000001813  | -0.000003770 | -0.000003915 |      |   |   |   |                                                                                       |
| C                   | 0.000001748  | 0.000000259  | -0.000004499 |      |   |   |   |                                                                                       |
| C                   | 0.000009009  | 0.000004928  | -0.000017636 |      |   |   |   |                                                                                       |
| O                   | -0.000001279 | -0.000003142 | 0.000006700  |      |   |   |   |                                                                                       |

|   |              |              |              |
|---|--------------|--------------|--------------|
| O | -0.000003755 | 0.000001551  | -0.000006258 |
| C | -0.000000925 | 0.000001349  | 0.000003461  |
| S | -0.000014328 | 0.000000073  | 0.000008419  |
| C | 0.000002021  | -0.000004919 | -0.000004235 |
| C | 0.000001158  | -0.000004506 | -0.000003267 |
| C | 0.000002188  | -0.000001440 | 0.000001024  |
| C | -0.000011188 | 0.000006107  | -0.000006923 |
| C | -0.000001111 | -0.000005115 | 0.000005908  |
| C | -0.000003196 | -0.000002682 | 0.000002986  |
| C | -0.000004186 | -0.000005303 | 0.000001072  |
| H | 0.000001073  | -0.000003948 | -0.000006507 |
| H | 0.000002467  | -0.000001364 | -0.000004578 |
| H | -0.000000517 | -0.000004093 | -0.000003519 |
| H | -0.000001230 | -0.000001832 | 0.000000074  |
| H | 0.000000858  | 0.000004903  | 0.000004338  |
| H | 0.000004931  | 0.000005084  | -0.000000496 |
| H | 0.000004799  | 0.000008469  | 0.000002187  |
| H | 0.000003244  | 0.000008215  | 0.000004970  |
| H | -0.000002048 | 0.000001925  | 0.000004625  |
| H | -0.000002904 | -0.000000504 | 0.000003060  |
| H | -0.000001434 | 0.000001620  | 0.000003008  |
| H | -0.000004773 | -0.000003712 | 0.000002065  |
| N | 0.000007781  | -0.000011015 | 0.000005199  |
| H | 0.000000860  | -0.000001334 | -0.000002191 |
| C | 0.000005141  | 0.000003798  | -0.000000729 |
| O | -0.000004428 | -0.000001317 | -0.000000860 |
| O | -0.000005211 | 0.000000482  | 0.000001303  |
| H | 0.000002065  | -0.000000055 | -0.000003233 |
| H | 0.000004077  | -0.000000197 | -0.000002643 |
| H | 0.000000522  | -0.000003561 | -0.000003949 |
| H | -0.000006334 | -0.000004947 | 0.000001906  |
| H | -0.000005657 | -0.000005353 | 0.000000110  |
| H | -0.000004648 | -0.000003019 | 0.000002633  |

| Geom.No                    |              |              |              |
|----------------------------|--------------|--------------|--------------|
| TS-VIII= -1696.46129789 Ha |              |              |              |
| Atom                       | X            | Y            | Z            |
| C                          | 0.000001164  | -0.000000538 | -0.000001900 |
| C                          | -0.000000744 | 0.000001844  | -0.000000897 |
| C                          | -0.000001156 | 0.000001015  | -0.000000071 |
| C                          | 0.000000759  | -0.000000466 | 0.000000028  |
| C                          | -0.000000019 | -0.000000376 | 0.000000002  |
| C                          | 0.000000113  | -0.000001468 | 0.000000286  |
| S                          | -0.000006966 | 0.000000390  | -0.000008793 |
| C                          | 0.000001792  | -0.000001881 | -0.000000734 |
| C                          | 0.000001715  | 0.000004262  | 0.000003280  |
| C                          | 0.000005214  | 0.000006543  | 0.000007628  |
| C                          | 0.000001305  | -0.000001911 | 0.000000649  |
| C                          | 0.000000887  | -0.000006799 | 0.000001135  |
| C                          | 0.000001985  | -0.000000231 | 0.000002590  |
| C                          | 0.000002689  | -0.000006298 | 0.000000073  |

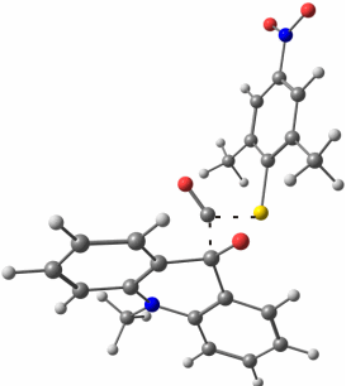



|   |              |              |              |
|---|--------------|--------------|--------------|
| S | 0.000002109  | -0.000009714 | 0.000000553  |
| C | 0.000007546  | -0.000004280 | 0.000009073  |
| O | -0.000002999 | 0.000000594  | -0.000006364 |
| C | 0.000001050  | -0.000000517 | 0.000002843  |
| N | 0.000002425  | -0.000000414 | 0.000002048  |
| O | 0.000002549  | -0.000003358 | 0.000002987  |
| C | 0.000001978  | -0.000003760 | -0.000003159 |
| O | 0.000004094  | -0.000001067 | 0.000003928  |
| C | -0.000016412 | 0.000000833  | -0.000000600 |
| C | 0.000003611  | 0.000003190  | -0.000000326 |
| C | 0.000000140  | 0.000000473  | -0.000001495 |
| N | 0.000001507  | -0.000000228 | -0.000002087 |
| C | -0.000006921 | 0.000001513  | -0.000001303 |
| C | 0.000001188  | 0.000001586  | 0.000000993  |
| C | -0.000000827 | -0.000000211 | -0.000000639 |
| C | 0.000000146  | -0.000000030 | 0.000000052  |
| C | 0.000000589  | 0.000000826  | 0.000000595  |
| C | 0.000002080  | 0.000002036  | 0.000000161  |
| C | -0.000002802 | 0.000001278  | -0.000003153 |
| C | -0.000003460 | 0.000002249  | -0.000003295 |
| C | -0.000002385 | 0.000003240  | -0.000003308 |
| C | 0.000000006  | 0.000002767  | -0.000001971 |
| O | 0.000000732  | 0.000000518  | -0.000002130 |
| C | -0.000005061 | -0.000000974 | -0.000001604 |
| H | 0.000002035  | 0.000001066  | 0.000001191  |
| H | 0.000002239  | 0.000001807  | 0.000000536  |
| H | 0.000000049  | -0.000000339 | 0.000000224  |
| H | -0.000002090 | -0.000000862 | -0.000001309 |
| H | -0.000003900 | 0.000000750  | -0.000003637 |
| H | -0.000001210 | 0.000003315  | -0.000001698 |
| H | -0.000002429 | 0.000003851  | -0.000003389 |
| H | -0.000004323 | 0.000002509  | -0.000004228 |
| H | -0.000002297 | -0.000000197 | -0.000002164 |
| H | -0.000004061 | -0.000001384 | -0.000001004 |
| H | -0.000003459 | -0.000001743 | -0.000003628 |
| H | 0.000001185  | -0.000004198 | 0.000001852  |
| H | 0.000003153  | 0.000001044  | 0.000002972  |
| H | 0.000004452  | 0.000004300  | 0.000002547  |
| H | 0.000004344  | 0.000010633  | -0.000002799 |
| H | 0.000001601  | -0.000000466 | 0.000003408  |
| H | 0.000000833  | -0.000001333 | 0.000003046  |
| H | -0.000003029 | -0.000005514 | 0.000001808  |
| H | 0.000002228  | -0.000005354 | -0.000000881 |

|                                                                             |   |   |   |  |
|-----------------------------------------------------------------------------|---|---|---|--|
| <b>R<sub>2</sub>=Cl, R<sub>4</sub>=H, R<sub>6</sub>=H, R<sub>2'</sub>=H</b> |   |   |   |  |
| <b>Geom.No</b>                                                              |   |   |   |  |
| <b>1=-1797.44584492 Ha</b>                                                  |   |   |   |  |
| Atom                                                                        | X | Y | Z |  |

|    |              |              |              |
|----|--------------|--------------|--------------|
| C  | -0.000002385 | 0.000001344  | 0.000002147  |
| C  | 0.000001217  | 0.000002076  | -0.000000564 |
| C  | 0.000002280  | 0.000000824  | -0.000000603 |
| C  | 0.000001252  | 0.000000258  | -0.000000798 |
| C  | 0.000000248  | 0.000000256  | -0.000000564 |
| C  | 0.000005388  | 0.000001168  | -0.000001101 |
| H  | 0.000001644  | 0.000002582  | 0.000000304  |
| H  | 0.000001868  | 0.000001493  | -0.000000333 |
| H  | 0.000001640  | 0.000000473  | -0.000001004 |
| H  | 0.000000931  | -0.000000837 | -0.000001092 |
| C  | -0.000003486 | -0.000000592 | -0.000001575 |
| C  | -0.000001300 | 0.000000735  | 0.000001297  |
| C  | -0.000001210 | 0.000001221  | -0.000000341 |
| N  | 0.000001732  | 0.000001113  | 0.000000155  |
| C  | 0.000003463  | -0.000003669 | -0.000000615 |
| C  | 0.000000067  | 0.000003093  | 0.000002777  |
| C  | 0.000000368  | 0.000000973  | 0.000001076  |
| C  | -0.000000737 | 0.000000521  | 0.000000463  |
| C  | -0.000000096 | 0.000001714  | 0.000000546  |
| C  | -0.000000156 | 0.000002425  | 0.000001701  |
| H  | -0.000000248 | -0.000000204 | 0.000000348  |
| H  | -0.000001496 | 0.000000567  | 0.000000951  |
| H  | -0.000000998 | 0.000001622  | 0.000001307  |
| H  | -0.000000077 | 0.000002529  | 0.000000507  |
| H  | 0.000000084  | 0.000001991  | -0.000000069 |
| H  | 0.000000517  | 0.000003030  | 0.000000431  |
| H  | 0.000000195  | 0.000002462  | 0.000001582  |
| S  | -0.000000095 | 0.000001327  | 0.000001704  |
| O  | -0.000000768 | 0.000003048  | 0.000000583  |
| C  | -0.000004292 | -0.000008635 | 0.000003587  |
| C  | -0.000000337 | 0.000001447  | -0.000004083 |
| C  | -0.000005291 | -0.000002897 | -0.000002621 |
| C  | 0.000001362  | -0.000004904 | 0.000003321  |
| C  | 0.000001078  | -0.000001655 | -0.000004665 |
| C  | -0.000001350 | -0.000001776 | -0.000000733 |
| Cl | 0.000001106  | -0.000002526 | 0.000000621  |
| H  | -0.000000028 | -0.000003387 | -0.000000431 |
| H  | -0.000001391 | -0.000003641 | -0.000001917 |
| H  | -0.000001315 | -0.000003609 | -0.000000432 |
| H  | 0.000000614  | -0.000001961 | -0.000001867 |

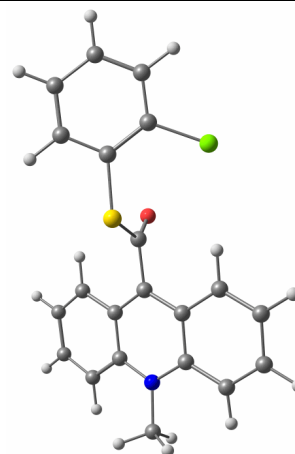

| Geom.No             |   |   |   |  |
|---------------------|---|---|---|--|
| 2=-1948.60575950 Ha |   |   |   |  |
| Atom                | X | Y | Z |  |

|    |              |              |              |
|----|--------------|--------------|--------------|
| C  | 0.000001005  | 0.000000242  | -0.000000417 |
| C  | -0.000006018 | -0.000002838 | 0.000006450  |
| C  | -0.000000704 | 0.000005276  | -0.000006324 |
| C  | -0.000000486 | -0.000001212 | -0.000002031 |
| C  | -0.000000111 | -0.000001216 | -0.000002675 |
| C  | -0.000001902 | -0.000000401 | -0.000004226 |
| C  | 0.000006331  | -0.000031100 | -0.000030534 |
| C  | -0.000004639 | 0.000013143  | 0.000013846  |
| C  | 0.000002511  | 0.000005154  | 0.000002661  |
| N  | 0.000003071  | -0.000007958 | 0.000001989  |
| C  | 0.000005027  | -0.000005393 | -0.000007411 |
| C  | -0.000002094 | -0.000002985 | 0.000003330  |
| C  | 0.000004222  | 0.000002687  | 0.000002868  |
| C  | 0.000003316  | -0.000001639 | -0.000005431 |
| C  | -0.000007179 | -0.000094036 | 0.000036402  |
| O  | 0.000004077  | -0.000003746 | -0.000004417 |
| O  | 0.000018714  | 0.000004745  | -0.000001495 |
| O  | -0.000020770 | 0.000006967  | 0.000000416  |
| C  | 0.000003317  | 0.000002140  | -0.000002027 |
| S  | 0.000009341  | 0.000111441  | -0.000016465 |
| C  | -0.000017676 | -0.000003867 | 0.000002645  |
| C  | 0.000039188  | -0.000012813 | -0.000008881 |
| C  | -0.000001585 | 0.000001974  | 0.000001851  |
| C  | -0.000003848 | 0.000003405  | 0.000005144  |
| C  | -0.000001324 | 0.000001903  | 0.000000377  |
| C  | 0.000000338  | 0.000003701  | 0.000003062  |
| Cl | -0.000037280 | 0.000013307  | 0.000012099  |
| H  | 0.000001788  | -0.000001729 | 0.000001877  |
| H  | 0.000004632  | -0.000001556 | 0.000000272  |
| H  | 0.000002486  | -0.000002231 | 0.000000738  |
| H  | 0.000001303  | -0.000001679 | 0.000001323  |
| H  | 0.000000081  | 0.000000044  | -0.000001970 |
| H  | -0.000002717 | -0.000000592 | -0.000002168 |
| H  | -0.000001275 | -0.000000136 | -0.000003071 |
| H  | 0.000000333  | -0.000001659 | -0.000003345 |
| H  | 0.000001719  | -0.000001594 | 0.000000088  |
| H  | 0.000000515  | -0.000002293 | -0.000001996 |
| H  | 0.000001048  | -0.000000743 | -0.000001255 |
| H  | -0.000000002 | 0.000001082  | 0.000002562  |
| H  | -0.000001104 | 0.000002562  | 0.000004061  |
| H  | -0.000002186 | 0.000003234  | 0.000002495  |
| H  | -0.000003750 | 0.000002707  | 0.000001083  |
| H  | 0.000002285  | -0.000002297 | -0.000001501 |

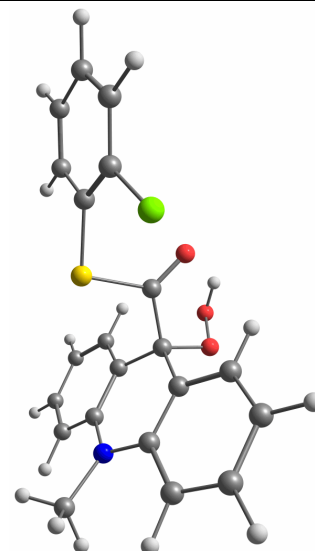

| Geom.No              |   |   |   |  |
|----------------------|---|---|---|--|
| 4= -1089.48594898 Ha |   |   |   |  |
| Atom                 | X | Y | Z |  |

|    |              |             |              |
|----|--------------|-------------|--------------|
| C  | 0.000036562  | 0.000000000 | 0.000218856  |
| C  | -0.000115830 | 0.000000000 | -0.000235487 |
| C  | 0.000207937  | 0.000000000 | 0.000001679  |
| C  | -0.000148877 | 0.000000000 | 0.000101248  |
| C  | -0.000007875 | 0.000000000 | -0.000026266 |
| C  | 0.000007320  | 0.000000000 | -0.000024318 |
| H  | 0.000035890  | 0.000000000 | 0.000069407  |
| H  | -0.000056299 | 0.000000000 | 0.000003611  |
| H  | 0.000027151  | 0.000000000 | -0.000036677 |
| H  | -0.000009015 | 0.000000000 | 0.000005834  |
| CL | 0.000018581  | 0.000000000 | -0.000086856 |
| S  | 0.000004457  | 0.000000000 | 0.000008970  |

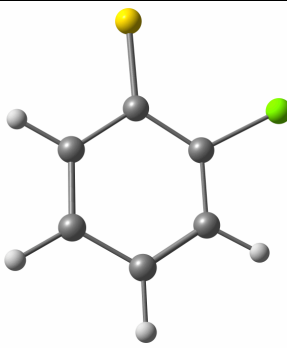

| Atom | X            | Y            | Z            |
|------|--------------|--------------|--------------|
| C    | -0.000016311 | -0.000000200 | 0.000011791  |
| C    | -0.000002006 | 0.000001660  | -0.000003012 |
| C    | 0.000002889  | 0.000001416  | -0.000025394 |
| C    | -0.000002125 | 0.000003017  | -0.000006994 |
| C    | -0.000001767 | 0.000000910  | -0.000003484 |
| C    | 0.000008116  | 0.000002498  | -0.000012692 |
| C    | -0.000004705 | 0.000004871  | 0.000002091  |
| C    | -0.000007246 | -0.000003520 | 0.000009263  |
| C    | -0.000001122 | 0.000000339  | 0.000001079  |
| N    | 0.000003684  | 0.000003381  | 0.000027421  |
| C    | 0.000003041  | -0.000001708 | 0.000000083  |
| C    | 0.000001586  | -0.000001672 | -0.000000585 |
| C    | 0.000002957  | -0.000002467 | 0.000001081  |
| C    | 0.000012711  | -0.000000511 | -0.000008554 |
| C    | -0.000002433 | -0.000004316 | 0.000003180  |
| O    | -0.000000612 | 0.000001998  | 0.000001987  |
| O    | 0.000000711  | -0.000005286 | 0.000002995  |
| C    | 0.000001814  | 0.000002100  | -0.000000006 |
| S    | 0.000001168  | 0.000000605  | 0.000000688  |
| C    | -0.000001228 | 0.000000018  | -0.000001152 |
| C    | 0.000002177  | -0.000000536 | -0.000001149 |
| C    | -0.000001051 | 0.000003287  | 0.000002760  |
| C    | -0.000002580 | -0.000002758 | 0.000002127  |
| C    | 0.000002719  | 0.000000776  | -0.000001571 |
| C    | -0.000001882 | -0.000003436 | 0.000006749  |
| C    | 0.000004342  | -0.000001001 | 0.000001187  |
| CL   | 0.000004289  | -0.000000412 | -0.000002707 |
| H    | 0.000005088  | -0.000001931 | 0.000000167  |
| H    | 0.000002910  | -0.000002394 | 0.000002881  |
| H    | 0.000000384  | -0.000001378 | 0.000003232  |
| H    | -0.000003714 | 0.000000986  | -0.000000037 |
| H    | -0.000002703 | 0.000002222  | -0.000001880 |
| H    | -0.000003151 | 0.000003630  | -0.000003392 |
| H    | -0.000001697 | 0.000000800  | -0.000005211 |
| H    | 0.000000460  | -0.000000600 | -0.000001607 |

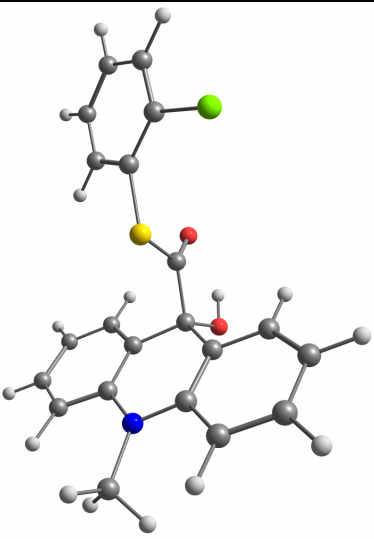

|   |              |              |              |
|---|--------------|--------------|--------------|
| H | 0.000001696  | 0.000000602  | -0.000003765 |
| H | -0.000000586 | 0.000001054  | -0.000003413 |
| H | 0.000001983  | -0.000001987 | 0.000001786  |
| H | -0.000000729 | -0.000000480 | 0.000000728  |
| H | -0.000002972 | -0.000000745 | 0.000000582  |
| H | -0.000001915 | 0.000000894  | -0.000000309 |
| H | -0.000002190 | 0.000000273  | 0.000003054  |

| Geom.No             |              |              |              |                                                                                     |
|---------------------|--------------|--------------|--------------|-------------------------------------------------------------------------------------|
| 7=-1872.90368892 Ha |              |              |              |                                                                                     |
| Atom                | X            | Y            | Z            |                                                                                     |
| C                   | 0.000000117  | 0.000001756  | 0.000001936  | 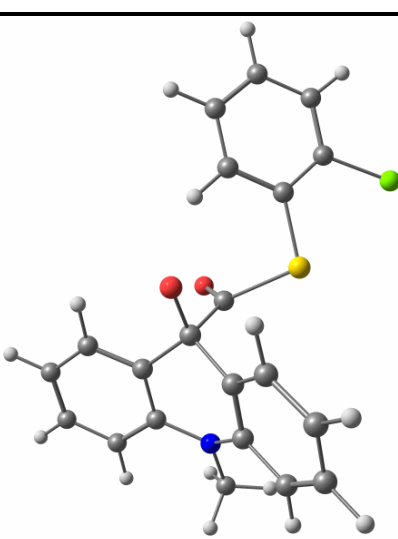 |
| C                   | 0.000011562  | 0.000004039  | -0.000000951 |                                                                                     |
| C                   | 0.000002070  | -0.000001540 | -0.000004592 |                                                                                     |
| C                   | -0.000000181 | 0.000002900  | 0.000004991  |                                                                                     |
| C                   | 0.000001824  | 0.000003184  | 0.000002334  |                                                                                     |
| C                   | 0.000003476  | 0.000002226  | 0.000000835  |                                                                                     |
| C                   | -0.000006389 | -0.000021922 | 0.000004060  |                                                                                     |
| C                   | 0.000001488  | 0.000003968  | -0.000002142 |                                                                                     |
| C                   | -0.000003253 | -0.000001104 | 0.000004726  |                                                                                     |
| N                   | 0.000000154  | 0.000008825  | 0.000004026  |                                                                                     |
| C                   | -0.000000325 | -0.000000033 | -0.000001210 |                                                                                     |
| C                   | -0.000002153 | -0.000000594 | -0.000000370 |                                                                                     |
| C                   | -0.000000216 | -0.000000442 | 0.000000843  |                                                                                     |
| C                   | -0.000000286 | -0.000002294 | -0.000002673 |                                                                                     |
| C                   | -0.000009455 | 0.000005009  | -0.000006612 |                                                                                     |
| O                   | -0.000000255 | 0.000009349  | -0.000006335 |                                                                                     |
| O                   | 0.000007171  | 0.000002597  | 0.000002744  |                                                                                     |
| C                   | 0.000001538  | -0.000001585 | 0.000000966  |                                                                                     |
| S                   | -0.000002631 | -0.000010242 | 0.000012917  |                                                                                     |
| C                   | 0.000004325  | 0.000012972  | -0.000018820 |                                                                                     |
| C                   | 0.000017536  | -0.000015985 | 0.000005148  |                                                                                     |
| C                   | -0.000008989 | 0.000009078  | -0.000002941 |                                                                                     |
| C                   | -0.000004140 | -0.000006357 | -0.000011578 |                                                                                     |
| C                   | 0.000013089  | -0.000006574 | -0.000001812 |                                                                                     |
| C                   | -0.000018888 | 0.000001262  | -0.000007397 |                                                                                     |
| Cl                  | -0.000002286 | -0.000001727 | 0.000019333  |                                                                                     |
| H                   | -0.000000001 | -0.000001961 | -0.000002390 |                                                                                     |
| H                   | 0.000000879  | -0.000002089 | -0.000001776 |                                                                                     |
| H                   | -0.000000406 | -0.000001069 | -0.000000973 |                                                                                     |
| H                   | -0.000001539 | -0.000000224 | 0.000001057  |                                                                                     |
| H                   | 0.000001950  | 0.000002855  | 0.000003965  |                                                                                     |
| H                   | 0.000002717  | 0.000000521  | -0.000000109 |                                                                                     |
| H                   | 0.000003809  | 0.000002723  | 0.000001378  |                                                                                     |
| H                   | 0.000002870  | 0.000003212  | 0.000003037  |                                                                                     |
| H                   | -0.000000767 | 0.000002577  | 0.000002192  |                                                                                     |
| H                   | -0.000001749 | 0.000001649  | 0.000001398  |                                                                                     |
| H                   | -0.000000212 | 0.000002126  | 0.000002702  |                                                                                     |
| H                   | -0.000004647 | -0.000002002 | -0.000001431 |                                                                                     |
| H                   | -0.000002249 | -0.000003161 | -0.000000697 |                                                                                     |
| H                   | 0.000001675  | -0.000002669 | -0.000002805 |                                                                                     |

|   |              |             |              |
|---|--------------|-------------|--------------|
| H | -0.000007231 | 0.000000742 | -0.000002975 |
|---|--------------|-------------|--------------|

| Geom.No                   |              |              |              |
|---------------------------|--------------|--------------|--------------|
| VIII-TS=-1872.89862260 Ha |              |              |              |
| Atom                      | X            | Y            | Z            |
| C                         | -0.000003440 | 0.000001371  | 0.000012564  |
| C                         | -0.000004888 | 0.000000075  | -0.000013338 |
| C                         | 0.000012758  | -0.000003587 | 0.000006103  |
| C                         | -0.000003952 | -0.000001096 | 0.000007307  |
| C                         | -0.000005485 | 0.000001395  | -0.000004921 |
| C                         | 0.000010833  | -0.000000300 | -0.000000159 |
| S                         | 0.001456674  | 0.001381989  | 0.001341436  |
| C                         | -0.003253222 | -0.001005131 | -0.001009434 |
| O                         | -0.000002983 | 0.000002279  | 0.000000125  |
| CL                        | -0.000000104 | -0.000001890 | -0.000001083 |
| C                         | 0.001802146  | -0.000363739 | -0.000336389 |
| C                         | 0.000002122  | -0.000003018 | 0.000010784  |
| C                         | -0.000002375 | 0.000001942  | -0.000001311 |
| N                         | -0.000000673 | -0.000002884 | 0.000000415  |
| C                         | 0.000000256  | 0.000006850  | -0.000004276 |
| C                         | -0.000002189 | -0.000015832 | -0.000002229 |
| C                         | 0.000000257  | -0.000001534 | -0.000000420 |
| C                         | -0.000001572 | -0.000003248 | 0.000001419  |
| C                         | -0.000001158 | -0.000001024 | 0.000001011  |
| C                         | 0.000003801  | -0.000001035 | 0.000000989  |
| C                         | -0.000001797 | 0.000001062  | -0.000002271 |
| C                         | 0.000000441  | 0.000001970  | -0.000001755 |
| C                         | -0.000002221 | 0.000002801  | -0.000001872 |
| C                         | 0.000001450  | 0.000004467  | -0.000000088 |
| O                         | -0.000004203 | 0.000001129  | 0.000004157  |
| C                         | -0.000000562 | -0.000001143 | -0.000003325 |
| H                         | 0.000001050  | -0.000001915 | 0.000001999  |
| H                         | 0.000000729  | 0.000000241  | 0.000001203  |
| H                         | 0.000000916  | -0.000003526 | 0.000000666  |
| H                         | 0.000000002  | -0.000003353 | -0.000001004 |
| H                         | -0.000000925 | -0.000000112 | -0.000001805 |
| H                         | 0.000000145  | 0.000003029  | 0.000000572  |
| H                         | -0.000000357 | 0.000003696  | -0.000001438 |
| H                         | -0.000000716 | 0.000002284  | -0.000002486 |
| H                         | -0.000001839 | -0.000001159 | -0.000003111 |
| H                         | -0.000000402 | -0.000001524 | -0.000001331 |
| H                         | -0.000000727 | -0.000000935 | -0.000001981 |
| H                         | 0.000001037  | -0.000001651 | 0.000000212  |
| H                         | 0.000001271  | 0.000000525  | 0.000002321  |
| H                         | -0.000000774 | 0.000001768  | 0.000002280  |
| H                         | 0.000000673  | 0.000000766  | 0.000000464  |

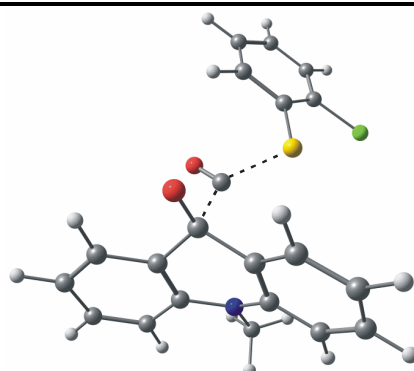

|                                                                              |
|------------------------------------------------------------------------------|
| <b>R<sub>2</sub>=Cl, R<sub>4</sub>=H, R<sub>6</sub>=Cl, R<sub>2</sub>'=H</b> |
| <b>Geom.No</b>                                                               |
| <b>1= -2257.03357189 Ha</b>                                                  |

| Atom | X            | Y            | Z            |
|------|--------------|--------------|--------------|
| C    | 0.000010930  | -0.000010619 | -0.000018459 |
| C    | -0.000001969 | 0.000018039  | 0.000018962  |
| C    | -0.000014100 | -0.000013909 | 0.000000942  |
| C    | 0.000011278  | -0.000004113 | -0.000011889 |
| C    | 0.000005258  | 0.000013467  | 0.000010272  |
| C    | -0.000013882 | -0.000007306 | 0.000007211  |
| S    | -0.000002107 | 0.000002638  | -0.000010918 |
| C    | 0.000006771  | -0.000008121 | 0.000010641  |
| O    | -0.000001736 | 0.000001307  | -0.000002425 |
| Cl   | 0.000001875  | 0.000003193  | 0.000002771  |
| C    | 0.000004258  | -0.000002328 | -0.000007945 |
| C    | -0.000006817 | 0.000003518  | 0.000005573  |
| C    | 0.000005678  | 0.000005329  | -0.000002839 |
| N    | -0.000003971 | -0.000005805 | -0.000002566 |
| C    | 0.000003228  | 0.000006128  | 0.000005168  |
| C    | -0.000001319 | 0.000004854  | 0.000003851  |
| C    | 0.000001038  | -0.000004145 | -0.000000815 |
| C    | -0.000003309 | 0.000002548  | 0.000001941  |
| C    | 0.000003281  | 0.000001290  | 0.000000545  |
| C    | -0.000001577 | -0.000002703 | -0.000001559 |
| C    | -0.000002036 | -0.000007261 | -0.000005477 |
| C    | -0.000005290 | 0.000003946  | 0.000002946  |
| C    | 0.000007169  | 0.000001806  | -0.000001072 |
| C    | -0.000002081 | -0.000006626 | -0.000005192 |
| C    | 0.000001382  | 0.000004149  | -0.000002233 |
| H    | -0.000001148 | 0.000000004  | -0.000000984 |
| H    | -0.000000687 | 0.000000701  | -0.000001209 |
| H    | 0.000000581  | -0.000000260 | -0.000000038 |
| H    | 0.000000482  | 0.000000561  | 0.000000527  |
| H    | 0.000000317  | 0.000000646  | -0.000000129 |
| H    | -0.000000943 | -0.000000123 | -0.000000131 |
| H    | 0.000000379  | -0.000000529 | -0.000000334 |
| H    | 0.000000964  | -0.000000460 | -0.000001607 |
| H    | 0.000000784  | 0.000001371  | 0.000000881  |
| H    | 0.000000103  | 0.000000594  | -0.000000799 |
| H    | -0.000001021 | 0.000001494  | 0.000000292  |
| H    | -0.000001249 | -0.000000448 | 0.000002773  |
| H    | -0.000000059 | -0.000002692 | -0.000000093 |
| H    | 0.000002160  | -0.000000348 | -0.000000121 |
| Cl   | -0.000002615 | 0.000000215  | 0.000003540  |

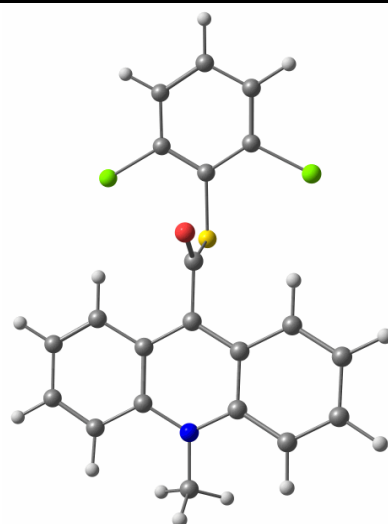

| Geom.No             |   |   |   |
|---------------------|---|---|---|
| 2=-2408.19359459 Ha |   |   |   |
| Atom                | X | Y | Z |

|    |              |              |              |
|----|--------------|--------------|--------------|
| C  | 0.000010645  | -0.000006259 | -0.000010190 |
| C  | -0.000002604 | -0.000008641 | 0.000013095  |
| C  | -0.000023281 | -0.000002907 | -0.000009351 |
| C  | 0.000007316  | -0.000007582 | -0.000005697 |
| C  | 0.000000425  | 0.000004929  | 0.000007354  |
| C  | -0.000011038 | -0.000003339 | 0.000003996  |
| C  | -0.000013711 | 0.000014684  | 0.000004557  |
| C  | -0.000006369 | -0.000019149 | -0.000034830 |
| C  | 0.000002579  | 0.000012612  | -0.000006716 |
| N  | 0.000018835  | -0.000030090 | 0.000019171  |
| C  | -0.000000223 | -0.000000502 | -0.000001391 |
| C  | 0.000006286  | -0.000000024 | -0.000001088 |
| C  | -0.000002211 | 0.000005404  | -0.000001116 |
| C  | 0.000006659  | 0.000005545  | 0.000008898  |
| C  | 0.000029579  | 0.000028550  | 0.000054393  |
| O  | -0.000020099 | -0.000002272 | -0.000024789 |
| O  | -0.000004482 | -0.000010697 | 0.000001897  |
| O  | -0.000002390 | 0.000005625  | 0.000009984  |
| C  | 0.000003141  | 0.000002107  | -0.000001711 |
| S  | -0.000051994 | 0.000004641  | -0.000080983 |
| C  | 0.000047044  | -0.000002979 | 0.000069997  |
| C  | 0.000038309  | -0.000009014 | -0.000005700 |
| C  | 0.000001613  | -0.000000925 | -0.000010638 |
| C  | 0.000000158  | 0.000000877  | 0.000001075  |
| C  | -0.000006782 | 0.000005182  | 0.000000348  |
| C  | 0.000054448  | -0.000031371 | -0.000108170 |
| Cl | -0.000042284 | 0.000007706  | 0.000010214  |
| Cl | -0.000054612 | 0.000035360  | 0.000105888  |
| H  | 0.000006426  | 0.000002806  | -0.000003704 |
| H  | 0.000003123  | 0.000004629  | -0.000002465 |
| H  | 0.000002994  | 0.000002766  | 0.000000965  |
| H  | -0.000000874 | 0.000004729  | 0.000001719  |
| H  | 0.000012659  | 0.000000741  | 0.000003211  |
| H  | -0.000002284 | -0.000003611 | 0.000001300  |
| H  | -0.000002431 | -0.000005587 | -0.000000569 |
| H  | 0.000000299  | -0.000002816 | 0.000002508  |
| H  | -0.000002961 | 0.000003701  | -0.000002922 |
| H  | -0.000002249 | -0.000003149 | -0.000001352 |
| H  | 0.000003325  | -0.000002191 | 0.000000561  |
| H  | 0.000001852  | 0.000002740  | -0.000001791 |
| H  | 0.000000654  | 0.000001254  | -0.000000987 |
| H  | -0.000001663 | -0.000000549 | 0.000000409  |
| H  | -0.000003825 | -0.000002933 | -0.000005378 |

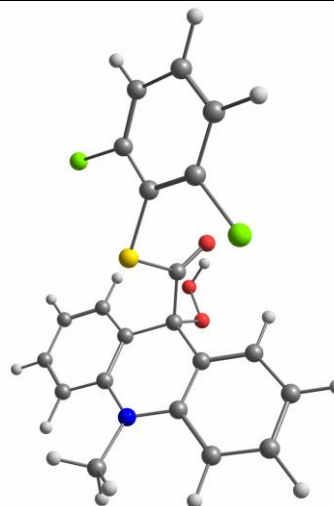



| Atom | X            | Y           | Z            |
|------|--------------|-------------|--------------|
| C    | -0.000083887 | 0.000000000 | 0.000139745  |
| C    | 0.000029647  | 0.000000000 | -0.000014795 |
| C    | 0.000000000  | 0.000000000 | 0.000009175  |
| C    | -0.000029647 | 0.000000000 | -0.000014795 |
| C    | 0.000083887  | 0.000000000 | 0.000139745  |
| C    | 0.000000000  | 0.000000000 | -0.000214606 |
| H    | -0.000007245 | 0.000000000 | -0.000001997 |
| H    | 0.000000000  | 0.000000000 | -0.000001169 |
| H    | 0.000007245  | 0.000000000 | -0.000001997 |
| Cl   | 0.000001956  | 0.000000000 | -0.000030942 |
| S    | 0.000000000  | 0.000000000 | 0.000022578  |
| Cl   | -0.000001956 | 0.000000000 | -0.000030942 |

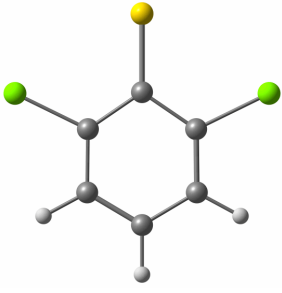

| Geom.No<br>6--2333.06497014 Ha |              |              |              |
|--------------------------------|--------------|--------------|--------------|
| Atom                           | X            | Y            | Z            |
| C                              | 0.000006631  | 0.000000486  | -0.000006837 |
| C                              | -0.000077321 | 0.000047779  | 0.000040692  |
| C                              | 0.000162883  | 0.000094815  | 0.000063727  |
| C                              | 0.000002687  | 0.000001863  | -0.000002033 |
| C                              | 0.000000479  | 0.000001619  | -0.000003730 |
| C                              | -0.000000982 | 0.000005075  | 0.000000755  |
| S                              | 0.000066734  | 0.000020891  | -0.000144477 |
| C                              | 0.000006391  | -0.000096630 | 0.000115368  |
| O                              | -0.000005678 | 0.000001130  | -0.000016732 |
| C                              | -0.000023697 | 0.000012268  | 0.000011570  |
| C                              | 0.000016742  | 0.000008076  | 0.000001932  |
| C                              | 0.000000998  | -0.000004288 | -0.000003678 |
| N                              | 0.000009623  | -0.000004427 | 0.000006455  |
| C                              | -0.000006579 | -0.000000805 | -0.000001221 |
| C                              | 0.000004453  | 0.000001165  | -0.000011819 |
| C                              | -0.000008913 | -0.000005645 | 0.000001388  |
| C                              | 0.000007774  | 0.000003733  | -0.000003778 |
| C                              | -0.000002569 | 0.000000125  | 0.000006318  |
| C                              | -0.000001935 | -0.000005116 | -0.000000823 |
| C                              | 0.000003305  | 0.000002662  | 0.000001901  |
| C                              | -0.000004448 | -0.000002163 | 0.000003906  |
| C                              | -0.000001800 | -0.000002241 | -0.000000351 |
| C                              | 0.000002832  | 0.000008116  | 0.000001774  |
| O                              | -0.000014060 | -0.000002635 | -0.000014469 |
| C                              | -0.000006760 | 0.000003600  | 0.000003741  |
| H                              | 0.000000244  | -0.000001177 | -0.000001540 |
| H                              | 0.000000852  | -0.000001722 | -0.000000904 |
| H                              | 0.000000822  | -0.000000945 | 0.000000090  |
| H                              | 0.000002587  | 0.000002452  | -0.000001723 |
| H                              | -0.000007194 | 0.000004311  | 0.000007118  |
| H                              | -0.000001254 | 0.000000376  | 0.000001280  |
| H                              | -0.000000895 | -0.000000371 | 0.000001098  |
| H                              | -0.000000315 | -0.000001027 | 0.000000852  |

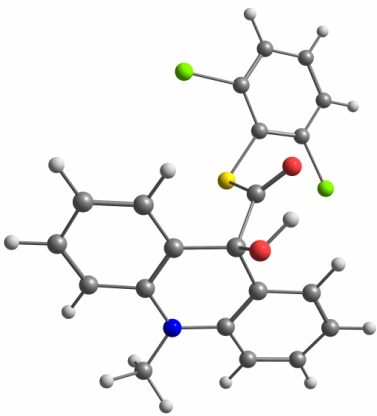

|    |              |              |              |
|----|--------------|--------------|--------------|
| H  | 0.000000425  | -0.000000722 | 0.000002677  |
| H  | 0.000000392  | -0.000002947 | -0.000001411 |
| H  | -0.000001039 | -0.000003926 | 0.000002036  |
| Cl | -0.000162915 | -0.000095572 | -0.000059190 |
| H  | 0.000001471  | 0.000002143  | -0.000002338 |
| H  | 0.000001280  | 0.000002585  | -0.000002191 |
| H  | 0.000000763  | 0.000002609  | -0.000001835 |
| Cl | 0.000015702  | -0.000003215 | 0.000002511  |
| H  | 0.000012282  | 0.000007696  | 0.000003890  |

| Geom.No             |              |              |              |                                                                                     |
|---------------------|--------------|--------------|--------------|-------------------------------------------------------------------------------------|
| 7=-2332.49890674 Ha |              |              |              |                                                                                     |
| Atom                | X            | Y            | Z            |                                                                                     |
| C                   | 0.000001203  | -0.000000059 | -0.000005666 | 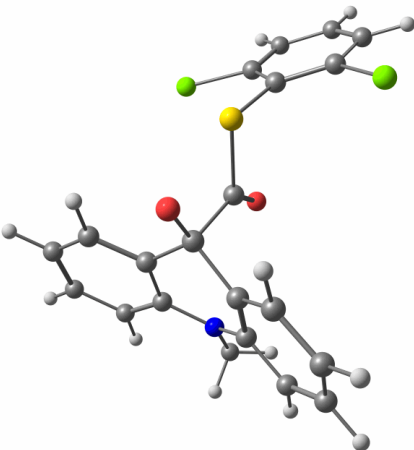 |
| C                   | 0.000014586  | -0.000003738 | 0.000003070  |                                                                                     |
| C                   | -0.000001751 | -0.000003907 | -0.000001421 |                                                                                     |
| C                   | 0.000001979  | 0.000000925  | -0.000007041 |                                                                                     |
| C                   | -0.000001081 | 0.000001013  | 0.000000023  |                                                                                     |
| C                   | -0.000006026 | -0.000000313 | -0.000002165 |                                                                                     |
| C                   | -0.000041902 | 0.000050966  | -0.000004474 |                                                                                     |
| C                   | 0.000018695  | -0.000016314 | 0.000024556  |                                                                                     |
| C                   | -0.000003560 | -0.000002328 | -0.000008102 |                                                                                     |
| N                   | -0.000000930 | 0.000013456  | 0.000003549  |                                                                                     |
| C                   | 0.000002099  | 0.000003336  | -0.000001431 |                                                                                     |
| C                   | 0.000006674  | 0.000002637  | 0.000000705  |                                                                                     |
| C                   | 0.000001642  | -0.000000915 | -0.000000087 |                                                                                     |
| C                   | 0.000000069  | 0.000001210  | 0.000000313  |                                                                                     |
| C                   | -0.000020694 | -0.000052778 | -0.000037202 |                                                                                     |
| O                   | 0.000014771  | 0.000023259  | 0.000015769  |                                                                                     |
| O                   | 0.000009479  | -0.000001085 | 0.000004458  |                                                                                     |
| C                   | -0.000000009 | -0.000004267 | -0.000000265 |                                                                                     |
| S                   | 0.000013007  | 0.000008345  | 0.000020758  |                                                                                     |
| C                   | -0.000001714 | -0.000046845 | -0.000016776 |                                                                                     |
| C                   | -0.000014783 | 0.000001096  | 0.000015689  |                                                                                     |
| C                   | 0.000003287  | 0.000003858  | -0.000000022 |                                                                                     |
| C                   | -0.000001089 | -0.000001313 | 0.000001833  |                                                                                     |
| C                   | -0.000002404 | 0.000004594  | -0.000000427 |                                                                                     |
| C                   | 0.000004027  | 0.000009470  | -0.000001459 |                                                                                     |
| Cl                  | -0.000001875 | -0.000000235 | 0.000003714  |                                                                                     |
| Cl                  | 0.000004118  | -0.000001441 | -0.000001976 |                                                                                     |
| H                   | 0.000004271  | 0.000000047  | 0.000004007  |                                                                                     |
| H                   | 0.000001848  | 0.000000547  | 0.000000645  |                                                                                     |
| H                   | 0.000005708  | 0.000001237  | 0.000001249  |                                                                                     |
| H                   | 0.000005428  | 0.000001859  | 0.000000479  |                                                                                     |
| H                   | -0.000000808 | 0.000001775  | -0.000005968 |                                                                                     |
| H                   | -0.000004378 | -0.000000467 | 0.000001597  |                                                                                     |
| H                   | -0.000002980 | -0.000000472 | -0.000001558 |                                                                                     |
| H                   | -0.000002189 | 0.000000933  | -0.000003199 |                                                                                     |
| H                   | -0.000000433 | 0.000003955  | -0.000000386 |                                                                                     |
| H                   | 0.000001652  | -0.000000085 | -0.000001799 |                                                                                     |
| H                   | 0.000003098  | 0.000002748  | -0.000004479 |                                                                                     |

|   |              |              |              |
|---|--------------|--------------|--------------|
| H | -0.000004757 | 0.000000433  | -0.000002889 |
| H | -0.000003463 | -0.000000775 | 0.000000994  |
| H | -0.000000814 | -0.000000361 | 0.000005385  |

| Geom.No                   |              |              |              |
|---------------------------|--------------|--------------|--------------|
| VIII-TS=-2332.49254956 Ha |              |              |              |
| Atom                      | X            | Y            | Z            |
| C                         | 0.000000382  | 0.000007030  | -0.000010585 |
| C                         | -0.000014772 | 0.000009050  | 0.000007021  |
| C                         | 0.000013945  | -0.000000031 | 0.000010137  |
| C                         | -0.000007529 | 0.000005870  | -0.000000415 |
| C                         | 0.000002226  | 0.000005416  | 0.000002662  |
| C                         | -0.000003748 | 0.000004621  | 0.000008800  |
| S                         | -0.003201825 | -0.010534701 | -0.001485938 |
| C                         | 0.009470510  | 0.010548800  | -0.002527779 |
| O                         | 0.000012605  | -0.000031222 | -0.000019634 |
| Cl                        | -0.000003392 | 0.000001562  | -0.000002286 |
| Cl                        | -0.000001846 | 0.000001878  | 0.000009063  |
| C                         | -0.006283130 | 0.000017905  | 0.004034579  |
| C                         | 0.000001459  | -0.000010710 | -0.000003994 |
| C                         | 0.000011774  | 0.000004624  | -0.000003149 |
| N                         | -0.000021606 | -0.000006773 | 0.000010103  |
| C                         | 0.000007697  | 0.000005155  | -0.000008825 |
| C                         | 0.000001077  | -0.000009924 | -0.000003370 |
| C                         | 0.000001310  | 0.000003694  | -0.000001484 |
| C                         | 0.000002005  | -0.000007163 | -0.000002263 |
| C                         | 0.000000053  | 0.000003826  | 0.000002472  |
| C                         | -0.000000907 | 0.000001550  | 0.000000708  |
| C                         | 0.000004033  | 0.000001299  | 0.000000561  |
| C                         | 0.000002302  | -0.000010793 | -0.000006129 |
| C                         | 0.000000307  | 0.000002255  | -0.000000263 |
| C                         | 0.000000547  | -0.000002849 | -0.000000193 |
| O                         | -0.000006250 | -0.000003447 | 0.000005311  |
| C                         | 0.000005898  | 0.000000270  | -0.000005601 |
| H                         | 0.000001239  | -0.000005512 | -0.000001342 |
| H                         | -0.000001562 | -0.000004065 | 0.000002788  |
| H                         | 0.000002061  | -0.000004083 | -0.000003046 |
| H                         | 0.000001095  | -0.000003776 | -0.000005530 |
| H                         | 0.000002564  | -0.000003265 | -0.000000656 |
| H                         | -0.000003622 | -0.000002380 | 0.000001720  |
| H                         | -0.000000560 | -0.000001911 | 0.000000572  |
| H                         | 0.000000504  | -0.000000488 | -0.000000910 |
| H                         | 0.000001489  | 0.000001019  | -0.000004939 |
| H                         | 0.000004656  | -0.000000394 | -0.000003335 |
| H                         | 0.000004801  | -0.000000999 | -0.000004084 |
| H                         | -0.000002328 | 0.000006820  | 0.000002476  |
| H                         | -0.000002128 | 0.000007592  | 0.000003143  |
| H                         | -0.000001335 | 0.000004247  | 0.000003629  |

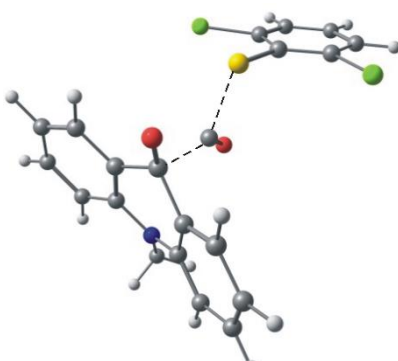

**R<sub>2</sub>=CH<sub>3</sub>, R<sub>4</sub>=H, R<sub>6</sub>=H, R<sub>2'</sub>=H**

**Geom.No**  
**1=-1377.17512149 Ha**

| Atom | X            | Y            | Z            |
|------|--------------|--------------|--------------|
| C    | -0.000000692 | 0.000005866  | -0.000003920 |
| C    | -0.000036742 | 0.000010067  | 0.000028748  |
| C    | 0.000002307  | 0.000001892  | -0.000005670 |
| C    | 0.000000107  | 0.000000825  | 0.000000592  |
| C    | -0.000001920 | 0.000007830  | -0.000005361 |
| C    | 0.000000538  | 0.000000833  | -0.000001242 |
| S    | 0.000054316  | -0.000008899 | -0.000006952 |
| C    | -0.000018942 | 0.000003871  | -0.000036288 |
| O    | 0.000000322  | -0.000000968 | 0.000006770  |
| C    | 0.000000062  | 0.000002593  | -0.000003557 |
| C    | -0.000015809 | 0.000000654  | 0.000012743  |
| C    | 0.000014224  | -0.000001747 | -0.000006898 |
| C    | -0.000008562 | -0.000005656 | 0.000011733  |
| N    | 0.000003786  | 0.000000436  | 0.000002141  |
| C    | -0.000001005 | -0.000011267 | -0.000000825 |
| C    | 0.000004530  | -0.000004828 | -0.000002216 |
| C    | -0.000002921 | 0.000002611  | 0.000003136  |
| C    | -0.000001221 | -0.000002655 | 0.000002953  |
| C    | 0.000000371  | -0.000002700 | 0.000001773  |
| C    | -0.000001566 | -0.000000063 | 0.000001726  |
| C    | 0.000003598  | 0.000009699  | 0.000005363  |
| C    | 0.000007511  | -0.000004683 | -0.000005582 |
| C    | -0.000004206 | -0.000003595 | 0.000003227  |
| C    | 0.000000508  | 0.000005730  | -0.000000127 |
| C    | -0.000003306 | 0.000002559  | 0.000001904  |
| H    | 0.000000026  | -0.000002777 | 0.000001073  |
| H    | -0.000001985 | -0.000002346 | 0.000003778  |
| H    | -0.000002364 | -0.000000984 | 0.000003687  |
| H    | -0.000002164 | -0.000000701 | 0.000001705  |
| H    | -0.000000459 | 0.000000734  | -0.000001287 |
| H    | 0.000000935  | 0.000000360  | -0.000002258 |
| H    | 0.000002530  | -0.000002207 | 0.000001270  |
| H    | 0.000003083  | -0.000005087 | 0.000001862  |
| H    | 0.000003390  | -0.000007537 | 0.000003359  |
| H    | 0.000001561  | -0.000005534 | 0.000002296  |
| H    | 0.000001111  | -0.000004283 | 0.000001780  |
| H    | -0.000000829 | 0.000004786  | -0.000004562 |
| H    | -0.000001552 | 0.000004990  | -0.000004353 |
| H    | -0.000003705 | 0.000004859  | -0.000001753 |
| H    | -0.000000456 | 0.000002310  | -0.000002215 |
| H    | 0.000000999  | 0.000001586  | -0.000003862 |
| H    | 0.000002939  | 0.000001657  | -0.000002721 |
| H    | 0.000001652  | 0.000001767  | -0.000001970 |

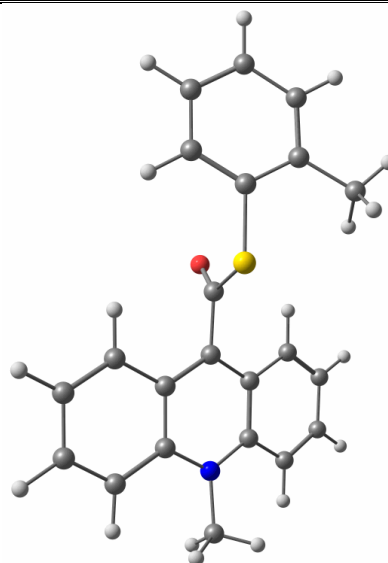

**Geom.No**  
**2= -1528.33703195 Ha**

| Atom | X            | Y            | Z            |
|------|--------------|--------------|--------------|
| C    | -0.000001659 | -0.000001641 | -0.000001761 |
| C    | 0.000010220  | 0.000005736  | -0.000001879 |
| C    | 0.000002649  | -0.000000942 | 0.000001543  |
| C    | -0.000000418 | 0.000000090  | -0.000003730 |
| C    | 0.000000228  | 0.000002438  | -0.000005179 |
| C    | -0.000002371 | 0.000002228  | -0.000002937 |
| S    | -0.000003680 | -0.000006613 | 0.000001877  |
| C    | -0.000010072 | -0.000010813 | -0.000000675 |
| O    | -0.000000291 | -0.000000577 | 0.000007371  |
| C    | -0.000002390 | 0.000004468  | 0.000001153  |
| C    | 0.000028117  | 0.000024887  | -0.000010065 |
| C    | -0.000006488 | 0.000005032  | -0.000011450 |
| C    | -0.000000636 | -0.000003012 | 0.000002263  |
| N    | -0.000000386 | 0.000003397  | 0.000001887  |
| C    | -0.000006189 | -0.000005255 | -0.000003399 |
| C    | -0.000006052 | -0.000018669 | 0.000011085  |
| C    | 0.000001457  | 0.000001458  | -0.000000237 |
| C    | -0.000001680 | 0.000003044  | 0.000000370  |
| C    | -0.000002607 | 0.000003404  | 0.000000434  |
| C    | -0.000004176 | -0.000003906 | 0.000006060  |
| C    | -0.000000460 | -0.000000094 | -0.000003598 |
| C    | 0.000005441  | -0.000003363 | 0.000001043  |
| C    | -0.000001126 | -0.000007569 | 0.000000823  |
| C    | -0.000001870 | 0.000004528  | -0.000005436 |
| O    | 0.000002703  | -0.000004212 | 0.000009570  |
| O    | -0.000002452 | 0.000007877  | 0.000007779  |
| C    | 0.000001477  | -0.000006093 | -0.000000051 |
| H    | 0.000000443  | -0.000002330 | -0.000001649 |
| H    | 0.000000668  | -0.000004114 | -0.000002850 |
| H    | 0.000001881  | -0.000003844 | -0.000002644 |
| H    | 0.000003237  | -0.000001193 | -0.000001256 |
| H    | -0.000007243 | 0.000002113  | -0.000002144 |
| H    | -0.000000232 | 0.000003152  | 0.000003382  |
| H    | -0.000000917 | 0.000002288  | 0.000002838  |
| H    | 0.000000423  | 0.000002572  | 0.000000692  |
| H    | 0.000000906  | -0.000001437 | 0.000003586  |
| H    | 0.000000131  | -0.000000919 | 0.000002466  |
| H    | 0.000000765  | -0.000000740 | 0.000000127  |
| H    | 0.000001154  | -0.000000173 | -0.000003802 |
| H    | 0.000000835  | -0.000000178 | -0.000004649 |
| H    | -0.000000196 | 0.000001280  | -0.000001905 |
| H    | -0.000000729 | 0.000002917  | -0.000000632 |
| H    | 0.000005081  | -0.000004506 | 0.000004074  |
| H    | 0.000000007  | 0.000004596  | 0.000002409  |
| H    | 0.000000141  | 0.000001915  | -0.000000237 |
| H    | -0.000003640 | 0.000002770  | -0.000000669 |

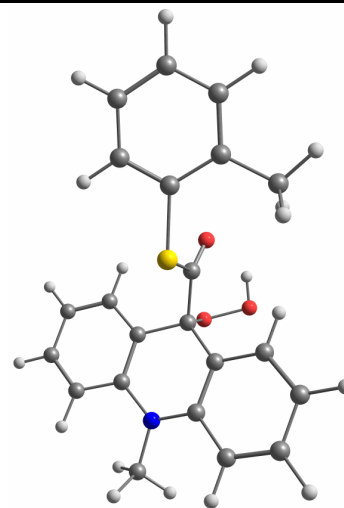

| 4=-669.207200992 Ha |              |              |              |
|---------------------|--------------|--------------|--------------|
| Atom                | X            | Y            | Z            |
| C                   | 0.000011021  | -0.000028308 | -0.000055238 |
| C                   | 0.000021708  | -0.000016526 | 0.000067795  |
| C                   | -0.000062348 | 0.000035924  | 0.000024428  |
| C                   | 0.000023909  | 0.000012915  | -0.000029362 |
| C                   | 0.000045696  | -0.000002760 | 0.000039652  |
| C                   | -0.000032555 | 0.000012306  | -0.000012045 |
| S                   | -0.000008608 | -0.000008951 | -0.000007092 |
| C                   | -0.000024395 | -0.000074897 | 0.000001617  |
| H                   | 0.000000874  | -0.000015346 | -0.000005454 |
| H                   | 0.000014789  | -0.000001543 | 0.000001386  |
| H                   | -0.000001454 | 0.000012207  | 0.000008666  |
| H                   | -0.000006142 | 0.000005674  | -0.000011324 |
| H                   | -0.000004643 | 0.000025031  | -0.000005254 |
| H                   | 0.000012199  | 0.000022980  | -0.000013043 |
| H                   | 0.000009951  | 0.000021293  | -0.000004731 |

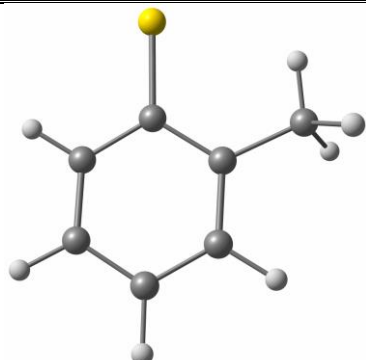

| Geom.No<br>6= -1453.20811578 Ha |              |              |              |
|---------------------------------|--------------|--------------|--------------|
| Atom                            | X            | Y            | Z            |
| C                               | 0.000002774  | 0.000004833  | -0.000006463 |
| C                               | 0.000020995  | 0.000002357  | 0.000010622  |
| C                               | -0.000019444 | 0.000009035  | 0.000003014  |
| C                               | 0.000003367  | 0.000001028  | -0.000007315 |
| C                               | 0.000008829  | -0.000003311 | 0.000012371  |
| C                               | -0.000000304 | -0.000000112 | 0.000005423  |
| C                               | -0.000008325 | 0.000022241  | -0.000017502 |
| C                               | -0.000005434 | -0.000023892 | 0.000019730  |
| C                               | -0.000002739 | 0.000005607  | -0.000004519 |
| N                               | -0.000009794 | -0.000016448 | -0.000005688 |
| C                               | -0.000009931 | -0.000001022 | 0.000001486  |
| C                               | -0.000002965 | -0.000004796 | 0.000001103  |
| C                               | -0.000005256 | -0.000004026 | 0.000004647  |
| C                               | -0.000006232 | 0.000004772  | -0.000001360 |
| C                               | 0.000021675  | 0.000003852  | 0.000011849  |
| O                               | -0.000012029 | 0.000007469  | -0.000001984 |
| O                               | 0.000014237  | -0.000013028 | 0.000000664  |
| C                               | 0.000008974  | 0.000011111  | 0.000005653  |
| S                               | -0.000012314 | -0.000013023 | -0.000016567 |
| H                               | -0.000000899 | -0.000000412 | -0.000003865 |
| H                               | -0.000008169 | -0.000002829 | -0.000003157 |
| H                               | -0.000006421 | -0.000001992 | -0.000004141 |
| H                               | -0.000001234 | -0.000004146 | -0.000005530 |
| H                               | 0.000003428  | 0.000000000  | 0.000003061  |
| H                               | 0.000004679  | 0.000003575  | 0.000003483  |
| H                               | 0.000001433  | 0.000001795  | 0.000003873  |
| H                               | 0.000002884  | 0.000001254  | 0.000010751  |
| H                               | -0.000006256 | -0.000004843 | 0.000005573  |
| H                               | -0.000003778 | -0.000000665 | 0.000000934  |
| H                               | -0.000003304 | -0.000001706 | 0.000002137  |

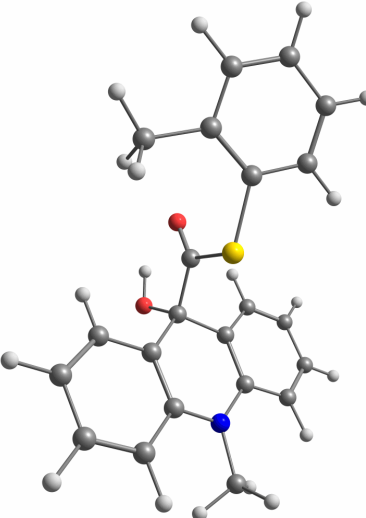

|   |              |              |              |
|---|--------------|--------------|--------------|
| H | -0.000005967 | 0.000006565  | -0.000004738 |
| C | 0.000003898  | -0.000000926 | 0.000009299  |
| C | 0.000000225  | 0.000006976  | -0.000009399 |
| C | 0.000003612  | 0.000002512  | 0.000001070  |
| C | 0.000003058  | -0.000005406 | -0.000002204 |
| C | 0.000004027  | -0.000000283 | 0.000001310  |
| C | -0.000002518 | 0.000002476  | -0.000015690 |
| C | 0.000005410  | -0.000003647 | 0.000001629  |
| H | 0.000004974  | 0.000000931  | -0.000001070 |
| H | 0.000000801  | 0.000000327  | -0.000001038 |
| H | -0.000002003 | 0.000001287  | -0.000000820 |
| H | -0.000001447 | -0.000000190 | 0.000000342  |
| H | 0.000007350  | 0.000001405  | 0.000000684  |
| H | 0.000005337  | 0.000003995  | -0.000001966 |
| H | 0.000004798  | 0.000001300  | -0.000005694 |

| Geom.No              |              |              |              | Atom | X | Y | Z | 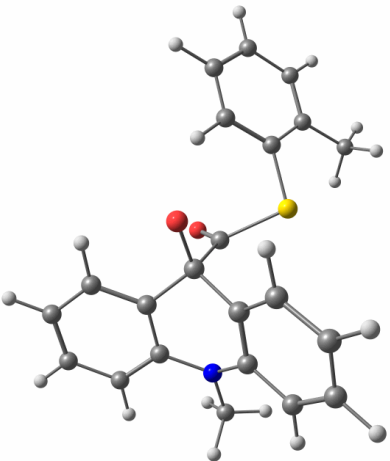 |
|----------------------|--------------|--------------|--------------|------|---|---|---|-------------------------------------------------------------------------------------|
| 7= -1452.62798978 Ha |              |              |              |      |   |   |   |                                                                                     |
| C                    | 0.000003754  | 0.000002144  | -0.000003721 |      |   |   |   |                                                                                     |
| C                    | 0.000000058  | 0.000002703  | 0.000000418  |      |   |   |   |                                                                                     |
| C                    | 0.000001638  | 0.000003347  | -0.000003792 |      |   |   |   |                                                                                     |
| C                    | 0.000001766  | 0.000002707  | -0.000001200 |      |   |   |   |                                                                                     |
| C                    | 0.000001338  | 0.000003341  | 0.000001176  |      |   |   |   |                                                                                     |
| C                    | 0.000000229  | 0.000003925  | 0.000001424  |      |   |   |   |                                                                                     |
| C                    | -0.000014113 | -0.000001697 | 0.000000110  |      |   |   |   |                                                                                     |
| C                    | -0.000003439 | 0.000001274  | 0.000004217  |      |   |   |   |                                                                                     |
| C                    | 0.000003509  | -0.000001480 | 0.000000977  |      |   |   |   |                                                                                     |
| N                    | -0.000001290 | 0.000001797  | 0.000001685  |      |   |   |   |                                                                                     |
| C                    | 0.000001212  | 0.000002476  | -0.000005257 |      |   |   |   |                                                                                     |
| C                    | -0.000002645 | -0.000002518 | -0.000003481 |      |   |   |   |                                                                                     |
| C                    | 0.000002255  | -0.000001932 | -0.000000077 |      |   |   |   |                                                                                     |
| C                    | 0.000001379  | -0.000000893 | -0.000004187 |      |   |   |   |                                                                                     |
| C                    | 0.000027139  | 0.000033872  | -0.000013596 |      |   |   |   |                                                                                     |
| O                    | -0.000015594 | -0.000026406 | 0.000018821  |      |   |   |   |                                                                                     |
| O                    | 0.000004128  | 0.000000085  | 0.000000438  |      |   |   |   |                                                                                     |
| C                    | 0.000001009  | -0.000002417 | 0.000002270  |      |   |   |   |                                                                                     |
| S                    | -0.000033803 | 0.000012458  | -0.000028984 |      |   |   |   |                                                                                     |
| C                    | 0.000021538  | -0.000017481 | 0.000016421  |      |   |   |   |                                                                                     |
| C                    | 0.000006751  | -0.000010119 | 0.000008818  |      |   |   |   |                                                                                     |
| C                    | -0.000007426 | 0.000005178  | -0.000002857 |      |   |   |   |                                                                                     |
| C                    | 0.000004266  | -0.000006709 | 0.000000532  |      |   |   |   |                                                                                     |
| C                    | -0.000003715 | 0.000006070  | 0.000001259  |      |   |   |   |                                                                                     |
| C                    | 0.000012047  | -0.000007281 | 0.000011586  |      |   |   |   |                                                                                     |
| C                    | -0.000006619 | -0.000000671 | -0.000000083 |      |   |   |   |                                                                                     |
| H                    | 0.000000501  | -0.000002353 | -0.000003783 |      |   |   |   |                                                                                     |
| H                    | 0.000000200  | -0.000000099 | -0.000003484 |      |   |   |   |                                                                                     |
| H                    | 0.000000940  | -0.000002078 | -0.000002779 |      |   |   |   |                                                                                     |
| H                    | 0.000001338  | -0.000000781 | -0.000000610 |      |   |   |   |                                                                                     |
| H                    | 0.000000002  | 0.000002141  | 0.000000007  |      |   |   |   |                                                                                     |
| H                    | 0.000000033  | 0.000002570  | 0.000000545  |      |   |   |   |                                                                                     |

|   |              |              |              |
|---|--------------|--------------|--------------|
| H | 0.000001226  | 0.000004675  | 0.000000163  |
| H | 0.000000740  | 0.000004294  | 0.000000438  |
| H | -0.000001300 | 0.000000824  | 0.000002065  |
| H | -0.000001244 | -0.000000755 | 0.000001369  |
| H | -0.000000114 | 0.000000991  | -0.000000207 |
| H | -0.000001744 | -0.000003569 | 0.000001297  |
| H | -0.000000933 | -0.000000352 | 0.000000953  |
| H | 0.000000584  | 0.000000832  | 0.000000388  |
| H | -0.000003070 | 0.000002963  | -0.000001206 |
| H | -0.000002901 | -0.000005429 | 0.000001132  |
| H | 0.000002037  | -0.000004252 | -0.000000535 |
| H | -0.000001665 | -0.000001397 | 0.000001331  |

| Geom.No                   |              |              |              |  |
|---------------------------|--------------|--------------|--------------|--|
| VIII-TS--1452.62353583 Ha |              |              |              |  |
| Atom                      | X            | Y            | Z            |  |
| C                         | 0.000003369  | -0.000001998 | 0.000003806  |  |
| C                         | 0.000000171  | 0.000004646  | -0.000000894 |  |
| C                         | 0.000004086  | -0.000002693 | 0.000001345  |  |
| C                         | -0.000000805 | 0.000000117  | 0.000001847  |  |
| C                         | 0.000001535  | -0.000000202 | 0.000000754  |  |
| C                         | 0.000002283  | -0.000002893 | 0.000000169  |  |
| S                         | 0.001230593  | 0.004382469  | 0.004733161  |  |
| C                         | -0.001472059 | -0.002433729 | -0.008583978 |  |
| O                         | -0.000002120 | -0.000000973 | 0.000000319  |  |
| C                         | 0.000000782  | -0.000003199 | 0.000000490  |  |
| C                         | 0.000237926  | -0.001949670 | 0.003852321  |  |
| C                         | 0.000000154  | 0.000001798  | -0.000000885 |  |
| C                         | -0.000001883 | 0.000001468  | -0.000001075 |  |
| N                         | -0.000001435 | -0.000000859 | -0.000000637 |  |
| C                         | 0.000000341  | 0.000001523  | -0.000000825 |  |
| C                         | 0.000000814  | 0.000001520  | 0.000000340  |  |
| C                         | -0.000002871 | 0.000001319  | -0.000001997 |  |
| C                         | -0.000001094 | 0.000002414  | -0.000001880 |  |
| C                         | -0.000003068 | 0.000004010  | -0.000000735 |  |
| C                         | -0.000001265 | 0.000002150  | -0.000001058 |  |
| C                         | -0.000000688 | -0.000001838 | 0.000000068  |  |
| C                         | 0.000000716  | -0.000000214 | 0.000000629  |  |
| C                         | 0.000001001  | -0.000000216 | 0.000001207  |  |
| C                         | 0.000001206  | -0.000001501 | 0.000000817  |  |
| O                         | 0.000003303  | 0.000000400  | 0.000000577  |  |
| C                         | -0.000001160 | -0.000000691 | -0.000002529 |  |
| H                         | 0.000001926  | -0.000000520 | 0.000002270  |  |
| H                         | 0.000001015  | 0.000001045  | 0.000002186  |  |
| H                         | 0.000000982  | -0.000001104 | 0.000000913  |  |
| H                         | -0.000000155 | -0.000000980 | -0.000000847 |  |
| H                         | -0.000002281 | 0.000001641  | -0.000002744 |  |
| H                         | -0.000001151 | 0.000002858  | 0.000000178  |  |
| H                         | -0.000002399 | 0.000003559  | -0.000001185 |  |
| H                         | -0.000003551 | 0.000003067  | -0.000002573 |  |
| H                         | -0.000001979 | -0.000000360 | -0.000002612 |  |



|   |              |              |              |
|---|--------------|--------------|--------------|
| H | -0.000001069 | -0.000001221 | -0.000001742 |
| H | -0.000001666 | 0.000000046  | -0.000001988 |
| H | 0.000001429  | -0.000002190 | 0.000001264  |
| H | 0.000001301  | -0.000000432 | 0.000001665  |
| H | 0.000001182  | 0.000000981  | 0.000002136  |
| H | 0.000000709  | 0.000001397  | 0.000001253  |
| H | 0.000001766  | -0.000003790 | 0.000000042  |
| H | 0.000002309  | -0.000003702 | 0.000000589  |
| H | 0.000001800  | -0.000003455 | -0.000000162 |

| $R_2=C(CH_3)_3$ $R_4=H$ $R_6=H$ , $R_2'=H$ |              |              |              |
|--------------------------------------------|--------------|--------------|--------------|
| Geom.No                                    |              |              |              |
| 1=-1495.11262934 Ha                        |              |              |              |
| Atom                                       | X            | Y            | Z            |
| C                                          | -0.000000004 | -0.000000345 | -0.000001122 |
| C                                          | -0.000001229 | 0.000000091  | 0.000001157  |
| C                                          | 0.000001940  | 0.000003857  | 0.000003758  |
| C                                          | -0.000000122 | 0.000000695  | 0.000001329  |
| C                                          | 0.000000346  | -0.000000106 | 0.000001630  |
| C                                          | 0.000000762  | 0.000001873  | 0.000001698  |
| C                                          | 0.0000009170 | 0.000006593  | 0.000005191  |
| C                                          | -0.000001088 | 0.000001313  | 0.000000756  |
| C                                          | -0.000005025 | -0.000003213 | 0.000001637  |
| N                                          | 0.000001571  | 0.000000642  | -0.000003743 |
| C                                          | 0.000000460  | -0.000000225 | 0.000003225  |
| C                                          | -0.000001042 | -0.000000263 | -0.000000025 |
| C                                          | -0.000000815 | -0.000000340 | -0.000001298 |
| C                                          | -0.000001981 | -0.000001691 | 0.000000352  |
| C                                          | -0.000020851 | 0.000001614  | -0.000005726 |
| O                                          | 0.000002027  | 0.000002675  | -0.000002415 |
| C                                          | 0.000000385  | -0.000000583 | 0.000003343  |
| S                                          | 0.000045903  | -0.000009188 | 0.000015879  |
| C                                          | -0.000031224 | 0.000007715  | -0.000014002 |
| C                                          | 0.000006520  | 0.000000175  | 0.000001088  |
| C                                          | -0.000003678 | -0.000001353 | -0.000004911 |
| C                                          | -0.000001691 | -0.000004882 | -0.000001612 |
| C                                          | 0.000009083  | -0.000000928 | 0.000000648  |
| C                                          | -0.000006290 | -0.000010170 | -0.000009890 |
| C                                          | 0.000022107  | -0.000009437 | -0.000019386 |
| H                                          | -0.000001085 | 0.000000236  | -0.000000080 |
| H                                          | -0.000002314 | -0.000000770 | 0.000000343  |
| H                                          | -0.000001301 | -0.000000904 | -0.000000240 |
| H                                          | -0.000000107 | -0.000000465 | -0.000000691 |
| H                                          | 0.000000410  | -0.000000022 | 0.000001356  |
| H                                          | 0.000001788  | 0.000000356  | 0.000000946  |
| H                                          | 0.000000880  | 0.000002282  | 0.000001751  |
| H                                          | -0.000000211 | 0.000001718  | -0.000000041 |
| H                                          | -0.000003112 | 0.000003090  | 0.000001520  |
| H                                          | -0.000001116 | 0.000000771  | 0.000002047  |
| H                                          | -0.000000061 | -0.000000966 | 0.000003143  |
| H                                          | 0.000000339  | 0.000002294  | -0.000003932 |

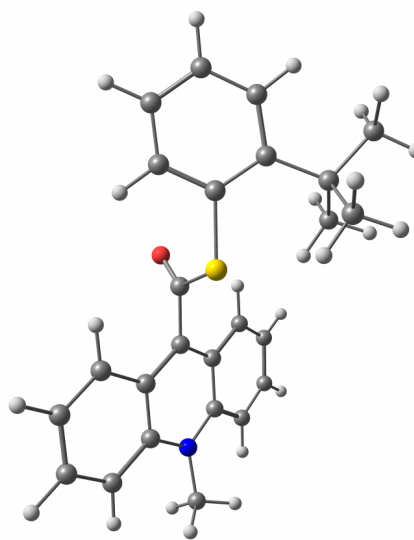

|   |              |              |              |
|---|--------------|--------------|--------------|
| H | 0.000001472  | 0.000000862  | -0.000003088 |
| H | 0.000001619  | -0.000001330 | -0.000000862 |
| H | -0.000001132 | -0.000002124 | -0.000000076 |
| C | -0.000005777 | -0.000003569 | 0.000009329  |
| C | -0.000001977 | 0.000009424  | 0.000015396  |
| C | -0.000027059 | 0.000013794  | 0.000008384  |
| H | 0.000002553  | -0.000001697 | -0.000005361 |
| H | -0.000000349 | 0.000000634  | -0.000003640 |
| H | -0.000000495 | -0.000000801 | 0.000000187  |
| H | 0.000005313  | -0.000000414 | 0.000002486  |
| H | 0.000002375  | -0.000005989 | -0.000000019 |
| H | 0.000004435  | 0.000000845  | -0.000003158 |
| H | 0.000001502  | -0.000002070 | -0.000000334 |
| H | -0.000000583 | 0.000000967  | -0.000003978 |
| H | -0.000001241 | -0.000000670 | 0.000001052  |

| Geom.No             |              |              |              | Atom | X | Y | Z | Chemical Structure |
|---------------------|--------------|--------------|--------------|------|---|---|---|--------------------|
| 2=-1646.27261227 Ha |              |              |              |      |   |   |   |                    |
| C                   | -0.000003052 | 0.000000686  | 0.000000393  |      |   |   |   |                    |
| C                   | 0.000000664  | 0.000001204  | 0.000000258  |      |   |   |   |                    |
| C                   | 0.000001399  | 0.000000852  | -0.000000519 |      |   |   |   |                    |
| C                   | 0.000000559  | 0.000000253  | -0.000002316 |      |   |   |   |                    |
| C                   | -0.000002042 | 0.000000395  | -0.000002431 |      |   |   |   |                    |
| C                   | 0.000001439  | 0.000000125  | -0.000001511 |      |   |   |   |                    |
| C                   | 0.000003130  | -0.000009291 | -0.000001811 |      |   |   |   |                    |
| C                   | -0.000002536 | 0.000000942  | -0.000000585 |      |   |   |   |                    |
| C                   | 0.000001051  | 0.000000789  | 0.000000078  |      |   |   |   |                    |
| N                   | 0.000001295  | -0.000000576 | -0.000001253 |      |   |   |   |                    |
| C                   | 0.000000928  | -0.000000389 | 0.000001272  |      |   |   |   |                    |
| C                   | 0.000001769  | 0.000000496  | 0.000000342  |      |   |   |   |                    |
| C                   | 0.000001798  | 0.000000486  | -0.000000768 |      |   |   |   |                    |
| C                   | 0.000001271  | -0.000000607 | 0.000000725  |      |   |   |   |                    |
| C                   | -0.000003838 | 0.000014081  | -0.000001273 |      |   |   |   |                    |
| O                   | 0.000002538  | -0.000004372 | 0.000003901  |      |   |   |   |                    |
| O                   | 0.000000778  | 0.000002652  | -0.000004172 |      |   |   |   |                    |
| O                   | -0.000004489 | -0.000001282 | 0.000001730  |      |   |   |   |                    |
| C                   | 0.000001404  | 0.000001019  | -0.000001164 |      |   |   |   |                    |
| S                   | 0.000002633  | -0.000009040 | -0.000000505 |      |   |   |   |                    |
| C                   | 0.000004498  | -0.000001976 | 0.000003371  |      |   |   |   |                    |
| C                   | -0.000000721 | 0.000000482  | -0.000000806 |      |   |   |   |                    |
| C                   | -0.000001630 | 0.000000521  | 0.000002515  |      |   |   |   |                    |
| C                   | -0.000001741 | -0.000001444 | 0.000001581  |      |   |   |   |                    |
| C                   | -0.000000082 | -0.000000041 | 0.000001744  |      |   |   |   |                    |
| C                   | -0.000002568 | -0.000000337 | 0.000002975  |      |   |   |   |                    |
| C                   | 0.000000406  | -0.000000266 | -0.000001004 |      |   |   |   |                    |
| C                   | -0.000001186 | -0.000000561 | -0.000000911 |      |   |   |   |                    |
| C                   | -0.000000496 | 0.000000354  | -0.000000004 |      |   |   |   |                    |
| C                   | -0.000001713 | -0.000000298 | -0.000000729 |      |   |   |   |                    |
| H                   | -0.000000056 | 0.000000250  | 0.000001844  |      |   |   |   |                    |
| H                   | -0.000000207 | 0.000000051  | -0.000002224 |      |   |   |   |                    |

|   |              |              |              |
|---|--------------|--------------|--------------|
| H | -0.00000788  | 0.000000002  | -0.00001934  |
| H | -0.00001439  | 0.000000145  | -0.00000944  |
| H | -0.00000614  | -0.000000451 | 0.000000140  |
| H | 0.000000021  | 0.000000002  | -0.000000112 |
| H | 0.000001857  | -0.000000160 | 0.000000644  |
| H | 0.000002384  | 0.000000146  | -0.000000177 |
| H | 0.000001376  | 0.000000210  | -0.000001671 |
| H | 0.000000578  | 0.000000729  | -0.000001496 |
| H | 0.000001488  | 0.000000111  | -0.000001907 |
| H | 0.000001368  | 0.000000492  | -0.000001960 |
| H | -0.000000104 | -0.000000153 | 0.000002510  |
| H | -0.000000528 | -0.000000521 | 0.000001731  |
| H | -0.000001450 | 0.000000351  | 0.000001762  |
| H | 0.000000529  | 0.000001364  | 0.000001234  |
| H | -0.000000695 | -0.000000228 | 0.000000366  |
| H | -0.000000916 | -0.000000293 | 0.000000326  |
| H | -0.000000710 | -0.000000649 | 0.000000396  |
| H | -0.000000846 | 0.000000295  | -0.000000478 |
| H | -0.000000295 | 0.000000306  | 0.000000766  |
| H | -0.000001316 | 0.000000107  | 0.000001296  |
| H | -0.000000285 | 0.000000098  | -0.000000540 |
| H | -0.000001403 | 0.000002957  | 0.000000523  |
| H | 0.000000586  | -0.000000019 | 0.000000786  |

| Geom.No             |              |              |              | Atom | X | Y | Z | 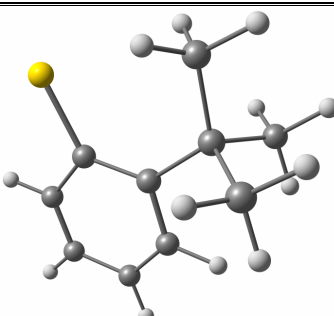 |
|---------------------|--------------|--------------|--------------|------|---|---|---|---------------------------------------------------------------------------------------|
| 4=-787.147229284 Ha |              |              |              |      |   |   |   |                                                                                       |
| C                   | 0.000008649  | 0.000005330  | 0.000007881  |      |   |   |   |                                                                                       |
| C                   | -0.000010122 | -0.000016144 | -0.000008874 |      |   |   |   |                                                                                       |
| C                   | 0.000017132  | 0.000006096  | -0.000001545 |      |   |   |   |                                                                                       |
| C                   | -0.000000944 | 0.000011562  | -0.000002122 |      |   |   |   |                                                                                       |
| C                   | 0.000014806  | -0.000030185 | 0.000000648  |      |   |   |   |                                                                                       |
| C                   | -0.000010990 | 0.000004899  | -0.000008596 |      |   |   |   |                                                                                       |
| S                   | -0.000010413 | 0.000009150  | -0.000011672 |      |   |   |   |                                                                                       |
| C                   | 0.000005153  | -0.000012036 | 0.000017453  |      |   |   |   |                                                                                       |
| C                   | -0.000003731 | -0.000001685 | 0.000008884  |      |   |   |   |                                                                                       |
| C                   | 0.000018230  | 0.000031944  | -0.000016054 |      |   |   |   |                                                                                       |
| C                   | -0.000010897 | 0.000011795  | -0.000000344 |      |   |   |   |                                                                                       |
| H                   | -0.000005132 | -0.000001515 | -0.000005057 |      |   |   |   |                                                                                       |
| H                   | 0.000001547  | 0.000006660  | 0.000000126  |      |   |   |   |                                                                                       |
| H                   | 0.000001108  | 0.000000368  | -0.000000425 |      |   |   |   |                                                                                       |
| H                   | 0.000003139  | 0.000000759  | -0.000007233 |      |   |   |   |                                                                                       |
| H                   | 0.000000854  | -0.000001135 | 0.000005455  |      |   |   |   |                                                                                       |
| H                   | -0.000006174 | -0.000006828 | 0.000005473  |      |   |   |   |                                                                                       |
| H                   | 0.000007926  | -0.000001990 | 0.000003040  |      |   |   |   |                                                                                       |
| H                   | -0.000006063 | -0.000001229 | -0.000004549 |      |   |   |   |                                                                                       |
| H                   | -0.000008477 | -0.000001235 | 0.000010761  |      |   |   |   |                                                                                       |
| H                   | 0.000001123  | -0.000000098 | 0.000000194  |      |   |   |   |                                                                                       |
| H                   | -0.000002082 | -0.000005289 | 0.000008594  |      |   |   |   |                                                                                       |
| H                   | -0.000002062 | -0.000004844 | 0.000001174  |      |   |   |   |                                                                                       |
| H                   | -0.000002580 | -0.000004350 | -0.000003213 |      |   |   |   |                                                                                       |

**Geom.No**  
**6= -1571.14382109 Ha**

| Atom | X            | Y            | Z            |
|------|--------------|--------------|--------------|
| C    | 0.000001809  | -0.000000598 | 0.000004884  |
| C    | -0.000001341 | 0.000000127  | 0.000003159  |
| C    | -0.000000609 | -0.000003775 | 0.000003125  |
| C    | -0.000002682 | -0.000001969 | 0.000006421  |
| C    | -0.000000415 | -0.000002813 | 0.000004656  |
| C    | 0.000002084  | -0.000003331 | 0.000004818  |
| C    | -0.000004018 | -0.000004783 | 0.000008907  |
| C    | 0.000003536  | -0.000002945 | -0.000008233 |
| C    | -0.000003416 | -0.000000189 | 0.000001860  |
| N    | -0.000004273 | -0.000001622 | 0.000004402  |
| C    | -0.000004362 | -0.000000399 | 0.000001383  |
| C    | -0.000002494 | -0.000001325 | 0.000001317  |
| C    | -0.000001492 | 0.000000922  | -0.000002501 |
| C    | -0.000001422 | -0.000000253 | 0.000002329  |
| C    | 0.000010289  | 0.000007127  | -0.000001273 |
| O    | 0.000003484  | -0.000000572 | -0.000000878 |
| O    | 0.000004456  | 0.000001452  | 0.000000990  |
| C    | -0.000004185 | -0.000003090 | 0.000004475  |
| S    | -0.000002909 | -0.000004999 | 0.000002504  |
| C    | -0.000000311 | 0.000002752  | -0.000004472 |
| C    | 0.000004169  | 0.000002005  | -0.000003642 |
| C    | 0.000002803  | 0.000002843  | -0.000006601 |
| C    | 0.000003537  | 0.000004393  | -0.000006061 |
| C    | 0.000002918  | 0.000002169  | -0.000004623 |
| C    | 0.000001188  | 0.000001724  | -0.000004284 |
| C    | 0.000003287  | 0.000001435  | -0.000002847 |
| H    | -0.000005202 | -0.000001322 | 0.000001997  |
| H    | -0.000004864 | 0.000000086  | -0.000000219 |
| H    | -0.000001378 | 0.000000804  | -0.000001639 |
| H    | 0.000001627  | 0.000000632  | -0.000001036 |
| H    | 0.000003995  | -0.000001838 | 0.000002717  |
| H    | 0.000002846  | -0.000002521 | 0.000005302  |
| H    | -0.000000876 | -0.000003740 | 0.000006838  |
| H    | -0.000003167 | -0.000003156 | 0.000006282  |
| H    | -0.000005686 | -0.000003083 | 0.000004679  |
| H    | -0.000005941 | -0.000002384 | 0.000003507  |
| H    | -0.000003771 | -0.000003183 | 0.000005356  |
| H    | 0.000002450  | 0.000003227  | -0.000005228 |
| H    | 0.000004456  | 0.000004159  | -0.000007472 |
| H    | 0.000004540  | 0.000004046  | -0.000006893 |
| H    | 0.000001894  | 0.000002605  | -0.000004351 |
| H    | 0.000004510  | -0.000000458 | 0.000001957  |
| C    | 0.000000546  | 0.000002716  | -0.000002348 |
| C    | -0.000001342 | -0.000001343 | 0.000001267  |
| C    | -0.000002930 | 0.000001291  | -0.000003231 |
| H    | 0.000000215  | 0.000001251  | -0.000002824 |
| H    | 0.000000236  | 0.000002288  | -0.000004066 |

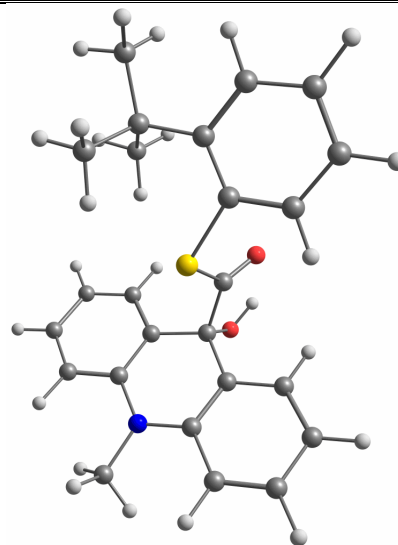

|   |              |              |              |
|---|--------------|--------------|--------------|
| H | 0.000001881  | 0.000001758  | -0.000003024 |
| H | -0.000002406 | 0.000001215  | -0.000001644 |
| H | -0.000002983 | 0.000001058  | -0.000001569 |
| H | -0.000002619 | 0.000001539  | -0.000004010 |
| H | 0.000000497  | -0.000000116 | 0.000000382  |
| H | 0.000003070  | 0.000000352  | -0.000000471 |
| H | 0.000000773  | -0.000000169 | -0.000000069 |

| Geom.No             |              |              |              |                                                                                     |
|---------------------|--------------|--------------|--------------|-------------------------------------------------------------------------------------|
| 7=-1570.56610072 Ha |              |              |              |                                                                                     |
| Atom                | X            | Y            | Z            |                                                                                     |
| C                   | 0.000003652  | 0.000000242  | 0.000000833  | 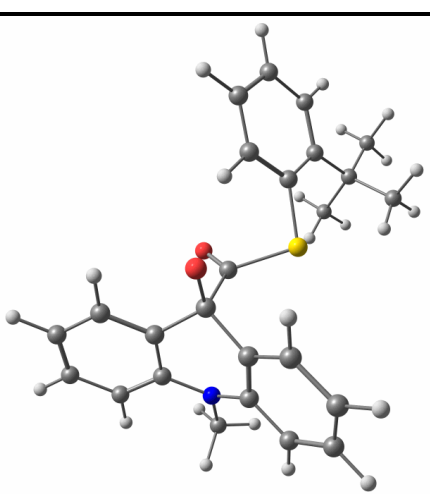 |
| C                   | -0.000007756 | -0.000000553 | -0.000000725 |                                                                                     |
| C                   | 0.000006657  | 0.000001098  | 0.000000273  |                                                                                     |
| C                   | -0.000000323 | -0.000000056 | 0.000005545  |                                                                                     |
| C                   | 0.000001209  | -0.000000036 | 0.000000412  |                                                                                     |
| C                   | 0.000004623  | -0.000000212 | 0.000001843  |                                                                                     |
| C                   | -0.000000269 | -0.000010396 | 0.000001172  |                                                                                     |
| C                   | -0.000014860 | -0.000000675 | -0.000000420 |                                                                                     |
| C                   | 0.000008062  | -0.000001209 | 0.000002563  |                                                                                     |
| N                   | -0.000003364 | -0.000003228 | -0.000001046 |                                                                                     |
| C                   | 0.000000053  | 0.000004390  | -0.000003483 |                                                                                     |
| C                   | -0.000009795 | -0.000003975 | -0.000001191 |                                                                                     |
| C                   | 0.000002915  | -0.000002458 | 0.000003733  |                                                                                     |
| C                   | 0.000001241  | 0.000003756  | -0.000004632 |                                                                                     |
| C                   | 0.000000997  | 0.000016471  | 0.000002477  |                                                                                     |
| O                   | -0.000001334 | -0.000005799 | 0.000012168  |                                                                                     |
| O                   | 0.000002949  | -0.000007746 | -0.000001513 |                                                                                     |
| C                   | 0.000000350  | -0.000000526 | 0.000002744  |                                                                                     |
| S                   | -0.000007388 | 0.000019754  | -0.000011962 |                                                                                     |
| C                   | -0.000000161 | -0.000000753 | -0.000017209 |                                                                                     |
| C                   | 0.000023985  | -0.000023130 | 0.000006699  |                                                                                     |
| C                   | -0.000017600 | 0.000023155  | 0.000001053  |                                                                                     |
| C                   | 0.000012804  | -0.000016234 | -0.000010617 |                                                                                     |
| C                   | -0.000031291 | 0.000030314  | -0.000014291 |                                                                                     |
| C                   | 0.000043255  | 0.000001891  | 0.000085178  |                                                                                     |
| C                   | 0.000001057  | -0.000038826 | -0.000039172 |                                                                                     |
| H                   | -0.000002916 | -0.000000316 | -0.000002185 |                                                                                     |
| H                   | -0.000002040 | 0.000002054  | -0.000001090 |                                                                                     |
| H                   | -0.000002669 | -0.000000189 | 0.000000701  |                                                                                     |
| H                   | -0.000002538 | -0.000001796 | 0.000002529  |                                                                                     |
| H                   | 0.000001380  | -0.000001843 | 0.000003040  |                                                                                     |
| H                   | 0.000002079  | 0.000000492  | 0.000000923  |                                                                                     |
| H                   | 0.000002679  | 0.000000861  | 0.000001760  |                                                                                     |
| H                   | 0.000002587  | -0.000000611 | 0.000003027  |                                                                                     |
| H                   | -0.000000336 | -0.000001892 | 0.000002877  |                                                                                     |
| H                   | -0.000001225 | -0.000001076 | 0.000002988  |                                                                                     |
| H                   | -0.000001713 | -0.000001923 | 0.000003143  |                                                                                     |
| H                   | 0.000003558  | -0.000011377 | -0.000013987 |                                                                                     |
| H                   | 0.000000302  | 0.000002076  | -0.000004728 |                                                                                     |
| H                   | 0.000003240  | 0.000002585  | -0.000004858 |                                                                                     |

|   |              |              |              |
|---|--------------|--------------|--------------|
| H | -0.000001342 | 0.000005276  | -0.000005606 |
| C | -0.000011382 | 0.000019184  | 0.000011509  |
| C | 0.000009768  | 0.000021721  | -0.000014223 |
| C | -0.000020448 | -0.000008465 | 0.000007248  |
| H | -0.000000980 | 0.000002270  | -0.000003619 |
| H | 0.000002712  | -0.000001651 | -0.000001289 |
| H | 0.000005586  | -0.000001508 | -0.000002817 |
| H | -0.000001601 | -0.000001812 | -0.000002305 |
| H | 0.000001722  | -0.000001896 | 0.000001054  |
| H | 0.000002893  | -0.000000248 | -0.000001276 |
| H | -0.000001561 | -0.000002267 | -0.000002314 |
| H | -0.000002855 | -0.000001265 | 0.000001388  |
| H | -0.000004566 | -0.000001645 | -0.000002322 |

| Geom.No                    |              |              |              | Atom | X | Y | Z | 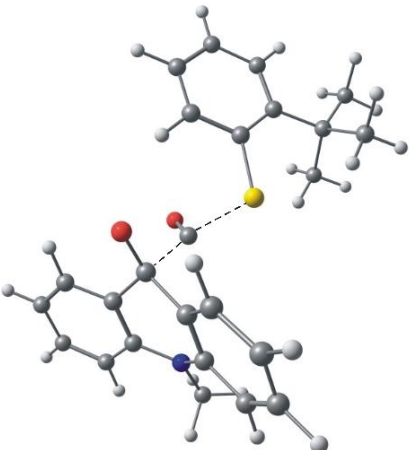 |
|----------------------------|--------------|--------------|--------------|------|---|---|---|-------------------------------------------------------------------------------------|
| VIII-TS= -1570.56087897 Ha |              |              |              |      |   |   |   |                                                                                     |
| C                          | -0.000003622 | -0.000006641 | -0.000000168 |      |   |   |   |                                                                                     |
| C                          | 0.000019821  | -0.000009225 | -0.000004781 |      |   |   |   |                                                                                     |
| C                          | -0.000015544 | 0.000011085  | 0.000004173  |      |   |   |   |                                                                                     |
| C                          | 0.000004688  | -0.000002774 | -0.000006836 |      |   |   |   |                                                                                     |
| C                          | -0.000001650 | -0.000004869 | -0.000000846 |      |   |   |   |                                                                                     |
| C                          | -0.000002214 | 0.000001237  | 0.000003469  |      |   |   |   |                                                                                     |
| S                          | -0.000772162 | -0.001437275 | -0.000880281 |      |   |   |   |                                                                                     |
| C                          | 0.002649372  | 0.000825243  | 0.001848257  |      |   |   |   |                                                                                     |
| O                          | 0.000008700  | -0.000012452 | -0.000003259 |      |   |   |   |                                                                                     |
| C                          | 0.000002766  | -0.000001525 | -0.000005172 |      |   |   |   |                                                                                     |
| C                          | -0.000001706 | -0.000002880 | 0.000001630  |      |   |   |   |                                                                                     |
| C                          | 0.000001158  | -0.000003711 | 0.000002729  |      |   |   |   |                                                                                     |
| C                          | 0.000000310  | -0.000003607 | -0.000002434 |      |   |   |   |                                                                                     |
| C                          | -0.001902272 | 0.000606105  | -0.000936724 |      |   |   |   |                                                                                     |
| C                          | 0.000009533  | 0.000004603  | -0.000015307 |      |   |   |   |                                                                                     |
| C                          | 0.000001717  | -0.000004999 | 0.000004924  |      |   |   |   |                                                                                     |
| N                          | -0.000012493 | 0.000004702  | -0.000010625 |      |   |   |   |                                                                                     |
| C                          | 0.000000894  | -0.000005721 | 0.000005501  |      |   |   |   |                                                                                     |
| C                          | 0.000003980  | 0.000014015  | 0.000001244  |      |   |   |   |                                                                                     |
| C                          | -0.000001642 | -0.000000856 | 0.000001688  |      |   |   |   |                                                                                     |
| C                          | 0.000001698  | -0.000000078 | 0.000002589  |      |   |   |   |                                                                                     |
| C                          | -0.000000395 | -0.000001085 | 0.000000890  |      |   |   |   |                                                                                     |
| C                          | -0.000000555 | 0.000002906  | 0.000003713  |      |   |   |   |                                                                                     |
| C                          | -0.000002716 | 0.000000330  | -0.000001042 |      |   |   |   |                                                                                     |
| C                          | -0.000001856 | -0.000000424 | 0.000002762  |      |   |   |   |                                                                                     |
| C                          | 0.000001636  | 0.000006060  | 0.000001514  |      |   |   |   |                                                                                     |
| C                          | -0.000003744 | -0.000006416 | -0.000004274 |      |   |   |   |                                                                                     |
| O                          | 0.000014018  | 0.000019743  | -0.000013571 |      |   |   |   |                                                                                     |
| C                          | 0.000004502  | 0.000001916  | -0.000000938 |      |   |   |   |                                                                                     |
| H                          | 0.000000190  | 0.000001639  | 0.000002444  |      |   |   |   |                                                                                     |
| H                          | 0.000000497  | 0.000000915  | 0.000001941  |      |   |   |   |                                                                                     |
| H                          | 0.000000924  | 0.000001141  | 0.000001329  |      |   |   |   |                                                                                     |
| H                          | 0.000000673  | -0.000001834 | 0.000001623  |      |   |   |   |                                                                                     |
| H                          | -0.000001382 | 0.000001856  | 0.000001348  |      |   |   |   |                                                                                     |

|   |              |              |              |
|---|--------------|--------------|--------------|
| H | -0.000001840 | 0.000001233  | 0.000001854  |
| H | -0.000003251 | 0.000001824  | -0.000002369 |
| H | -0.000001757 | 0.000002083  | -0.000003103 |
| H | -0.000000915 | -0.000001352 | -0.000001159 |
| H | -0.000000459 | 0.000001184  | 0.000001476  |
| H | -0.000000478 | -0.000000172 | -0.000000851 |
| H | -0.000000295 | -0.000002037 | -0.000002132 |
| H | -0.000002838 | 0.000001799  | -0.000002367 |
| H | 0.000001650  | 0.000001558  | -0.000001867 |
| H | 0.000003995  | 0.000007582  | 0.000003161  |
| H | -0.000000232 | -0.000003782 | -0.000001948 |
| H | -0.000000096 | 0.000004604  | 0.000002868  |
| H | 0.000002931  | -0.000001222 | -0.000001504 |
| H | -0.000000356 | -0.000003737 | 0.000002628  |
| H | -0.000001430 | -0.000000904 | -0.000002104 |
| H | -0.000001971 | -0.000002265 | 0.000001771  |
| H | 0.000001647  | -0.000001939 | -0.000001464 |
| H | 0.000001137  | -0.000001019 | 0.000000075  |
| H | 0.000001430  | -0.000000559 | -0.000000474 |

| $R_2=H$ $R_4=H$ , $R_6=H$ $R_7=OCH_3$ |              |              |              |
|---------------------------------------|--------------|--------------|--------------|
| Geom.No                               |              |              |              |
| 1= -1452.38560725 Ha                  |              |              |              |
| Atom                                  | X            | Y            | Z            |
| C                                     | -0.000000284 | 0.000002939  | -0.000001184 |
| C                                     | 0.000004205  | 0.000001314  | 0.000009880  |
| C                                     | -0.000001822 | -0.000005659 | -0.000009613 |
| C                                     | 0.000000878  | 0.000000143  | -0.000000047 |
| C                                     | 0.000000270  | -0.000001721 | 0.000003333  |
| C                                     | 0.000000529  | 0.000004462  | -0.000012691 |
| C                                     | 0.000000446  | 0.000005513  | -0.000019026 |
| C                                     | -0.000009083 | -0.000005046 | 0.000002661  |
| C                                     | 0.000015520  | 0.000000770  | -0.000009907 |
| N                                     | -0.000006771 | -0.000001343 | 0.000011484  |
| C                                     | -0.000004478 | -0.000000020 | 0.000002746  |
| C                                     | 0.000003759  | -0.000000622 | -0.000001093 |
| C                                     | -0.000003202 | -0.000002047 | -0.000000799 |
| C                                     | 0.000004527  | 0.000001748  | 0.000000000  |
| C                                     | -0.000058408 | 0.000082221  | 0.000014781  |
| O                                     | -0.000009545 | 0.000000478  | 0.000011688  |
| C                                     | 0.000001038  | -0.000001740 | -0.000011472 |
| S                                     | 0.000100222  | -0.000085192 | 0.000045540  |
| C                                     | -0.000056243 | -0.000004308 | -0.000062746 |
| C                                     | 0.000005484  | 0.000004253  | 0.000003257  |
| C                                     | -0.000000598 | 0.000003320  | -0.000000728 |
| C                                     | -0.000002419 | 0.000000961  | 0.000003356  |
| C                                     | -0.000001257 | 0.000000048  | 0.000006505  |
| C                                     | 0.000014529  | 0.000007802  | 0.000001888  |
| H                                     | -0.000002280 | 0.000001701  | 0.000002472  |
| H                                     | 0.000000969  | -0.000001833 | -0.000000124 |
| H                                     | 0.000002638  | -0.000002640 | -0.000000705 |

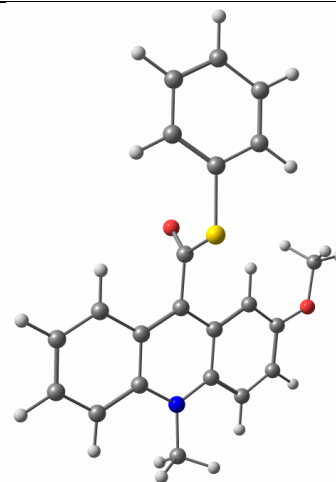

|   |              |              |              |
|---|--------------|--------------|--------------|
| H | 0.000001602  | -0.000000669 | 0.000000172  |
| H | -0.000000336 | -0.000001694 | -0.000000574 |
| H | 0.000000104  | -0.000000125 | -0.000001254 |
| O | -0.000006982 | 0.000002877  | 0.000004369  |
| H | -0.000000684 | -0.000004329 | -0.000002118 |
| H | 0.000001340  | -0.000005109 | 0.000001222  |
| H | 0.000003267  | -0.000005165 | 0.000000599  |
| H | 0.000001184  | -0.000004264 | -0.000000942 |
| H | -0.000000013 | -0.000001064 | -0.000003282 |
| H | -0.000000227 | 0.000004180  | 0.000001808  |
| H | 0.000000630  | 0.000004886  | 0.000001871  |
| H | -0.000001240 | 0.000003760  | 0.000003051  |
| H | 0.000005917  | 0.000001692  | 0.000006528  |
| C | 0.000001941  | -0.000002985 | -0.000000627 |
| H | -0.000001726 | 0.000000768  | -0.000000322 |
| H | -0.000002702 | 0.000000517  | -0.000003444 |
| H | -0.000000699 | 0.000001225  | 0.000003484  |

| Geom.No<br>2= -1603.53970619 Ha |              |              |              |
|---------------------------------|--------------|--------------|--------------|
| Atom                            | X            | Y            | Z            |
| C                               | 0.000000250  | -0.000001726 | -0.000000176 |
| C                               | -0.000017449 | 0.000000150  | 0.000009320  |
| C                               | 0.000000400  | 0.000000422  | -0.000001451 |
| C                               | -0.000000706 | -0.000000193 | -0.000000226 |
| C                               | -0.000000702 | -0.000000522 | -0.000001715 |
| C                               | -0.000000200 | -0.000001197 | -0.000000254 |
| S                               | 0.000024907  | 0.000025798  | -0.000014221 |
| C                               | -0.000021190 | -0.000031978 | 0.000009489  |
| O                               | 0.000003856  | 0.000002759  | 0.000001136  |
| C                               | 0.000018192  | 0.000001552  | -0.000008832 |
| C                               | -0.000008136 | 0.000003123  | 0.000007561  |
| C                               | 0.000003318  | -0.000001076 | -0.000004118 |
| N                               | -0.000000275 | -0.000000151 | 0.000003081  |
| C                               | -0.000000997 | 0.000002650  | 0.000000307  |
| C                               | 0.000002610  | 0.000000190  | 0.000001942  |
| C                               | -0.000001852 | -0.000000358 | -0.000001037 |
| C                               | 0.000000035  | 0.000000159  | 0.000000185  |
| C                               | 0.000000515  | -0.000001739 | 0.000001765  |
| C                               | -0.000000422 | -0.000003842 | -0.000001859 |
| C                               | 0.000000779  | 0.000001896  | 0.000000038  |
| C                               | 0.000001866  | 0.000002114  | -0.000000375 |
| C                               | -0.000000217 | 0.000002384  | 0.000001739  |
| C                               | -0.000001430 | 0.000001866  | -0.000000086 |
| O                               | -0.000001144 | -0.000003624 | -0.000001860 |
| C                               | -0.000001793 | -0.000002556 | -0.000001657 |
| O                               | -0.000003260 | -0.000001356 | 0.000001234  |
| O                               | 0.000003668  | 0.000000668  | 0.000001253  |
| C                               | -0.000000597 | 0.000002556  | -0.000002302 |
| H                               | -0.000002009 | -0.000001240 | 0.000000237  |
| H                               | 0.000000731  | 0.000001298  | 0.000000339  |

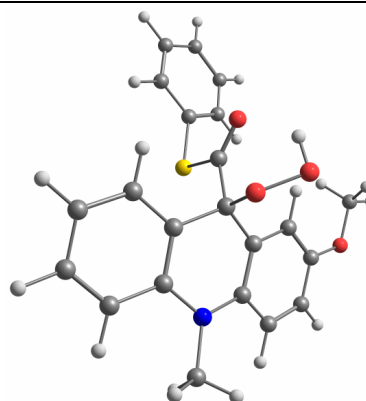



|   |              |              |              |
|---|--------------|--------------|--------------|
| H | 0.000000068  | -0.000000964 | -0.000000828 |
| H | 0.000001230  | -0.000001191 | 0.000002098  |
| H | 0.000000579  | 0.000001744  | 0.000002234  |
| H | 0.000000672  | 0.000002892  | 0.000000186  |
| H | 0.000000177  | 0.000003313  | 0.000000070  |
| H | 0.000000648  | 0.000002475  | -0.000000510 |
| H | 0.000000032  | -0.000000465 | -0.000000835 |
| H | 0.000000152  | 0.000002490  | 0.000000004  |
| H | 0.000000087  | 0.000001795  | -0.000000550 |
| H | -0.000000208 | 0.000001030  | -0.000001460 |
| H | -0.000000115 | 0.000000193  | -0.000001366 |
| H | -0.000000275 | -0.000001073 | -0.000000448 |
| H | -0.000000496 | -0.000002032 | -0.000000308 |
| H | -0.000000873 | 0.000000016  | 0.000000885  |
| H | -0.000000133 | -0.000003115 | 0.000000268  |
| H | -0.000000213 | -0.000002784 | 0.000000479  |

| Geom.No<br>3= -973.086548205 Ha |              |              |              |
|---------------------------------|--------------|--------------|--------------|
| Atom                            | X            | Y            | Z            |
| C                               | -0.000004306 | 0.000000010  | 0.000006200  |
| C                               | 0.000003891  | -0.000004276 | 0.000014364  |
| C                               | -0.000001340 | 0.000004846  | 0.000000215  |
| C                               | 0.000001352  | 0.000002905  | 0.000002583  |
| C                               | 0.000005219  | 0.000000421  | -0.000005713 |
| C                               | 0.000002578  | -0.000003021 | 0.000001896  |
| N                               | -0.000001067 | 0.000006687  | 0.000006159  |
| C                               | -0.000013214 | 0.000003982  | -0.000000342 |
| C                               | -0.000002407 | 0.000001609  | -0.000011675 |
| C                               | 0.000002159  | -0.000021287 | 0.000001886  |
| C                               | -0.000001291 | 0.000001525  | -0.000001063 |
| C                               | -0.000001260 | -0.000000200 | -0.000003872 |
| C                               | -0.000002178 | -0.000000927 | -0.000007955 |
| C                               | 0.000016135  | -0.000006360 | -0.000006705 |
| C                               | 0.000000808  | 0.000014038  | 0.000002200  |
| O                               | 0.000000782  | -0.000005146 | -0.000001585 |
| O                               | -0.000006221 | 0.000011432  | -0.000000031 |
| C                               | 0.000001290  | -0.000004606 | -0.000000090 |
| O                               | 0.000001465  | 0.000001118  | -0.000000738 |
| C                               | -0.000001751 | -0.000001303 | 0.000000978  |
| O                               | -0.000001790 | -0.000000069 | -0.000001275 |
| H                               | -0.000000984 | -0.000001510 | -0.000001395 |
| H                               | -0.000001385 | -0.000001182 | -0.000000580 |
| H                               | -0.000000825 | 0.000000587  | -0.000000933 |
| H                               | -0.000000806 | 0.000000800  | 0.000001249  |
| H                               | -0.000000913 | -0.000000378 | 0.000000822  |
| H                               | 0.000003399  | -0.000000261 | -0.000000075 |
| H                               | 0.000000477  | -0.000001116 | 0.000000405  |
| H                               | 0.000000214  | -0.000002211 | -0.000000786 |
| H                               | -0.000000334 | -0.000001817 | -0.000001769 |
| H                               | 0.000000441  | -0.000000004 | 0.000000930  |

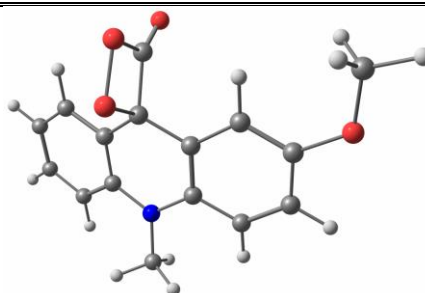

|   |             |             |             |
|---|-------------|-------------|-------------|
| H | 0.000000124 | 0.000002368 | 0.000001500 |
| H | 0.000001626 | 0.000001733 | 0.000002494 |
| H | 0.000000113 | 0.000001611 |             |

| Geom.No<br>III-TS=-973.063867097 Ha |             |             |             |
|-------------------------------------|-------------|-------------|-------------|
| Atom                                | X           | Y           | Z           |
| C                                   | 0.000664833 | -           | 0.001330079 |
| C                                   | 0.002306026 | 0.000072329 | -           |
| C                                   | 0.000215488 | 0.000048687 | 0.002134878 |
| C                                   | -           | 0.000535347 | -           |
| C                                   | 0.001458730 | -           | 0.001100421 |
| C                                   | -           | 0.000145943 | 0.000155326 |
| C                                   | 0.000699907 | -           | -           |
| C                                   | 0.000937454 | 0.000052075 | 0.000692557 |
| C                                   | 0.026479276 | 0.000028674 | -           |
| N                                   | -           | 0.036032754 | 0.000243855 |
| C                                   | 0.001159846 | 0.000145004 | 0.020724559 |
| C                                   | -           | -           | 0.001070405 |
| C                                   | 0.000474069 | 0.000795024 | 0.002864651 |
| C                                   | -           | 0.001190445 | -           |
| C                                   | 0.002749128 | 0.000177828 | 0.001117836 |
| O                                   | 0.001170577 | -           | -           |
| O                                   | 0.000994435 | 0.000085828 | 0.000155687 |
| C                                   | -           | -           | 0.001039255 |
| O                                   | 0.001486393 | 0.000041806 | -           |
| O                                   | -           | 0.000104888 | 0.000984938 |
| C                                   | 0.000219288 | -           | -           |
| H                                   | 0.002891136 | 0.000282403 | 0.001186225 |
| H                                   | -           | -           | 0.001632575 |
| H                                   | 0.001520544 | 0.000423603 | -           |
| H                                   | -           | -           | 0.001037199 |
| H                                   | 0.001940058 | 0.000716141 | -           |
| H                                   | -           | -           | 0.001314950 |
| H                                   | 0.019883018 | 0.025225166 | -           |
| H                                   | -           | -           | 0.015024211 |
| H                                   | 0.003070121 | 0.009912026 | -           |
| H                                   | 0.002148858 | 0.000005508 | 0.003436639 |
| H                                   | -           | 0.000001766 | 0.000694253 |
| H                                   | 0.002966480 | -           | -           |
| H                                   | -           | 0.000165712 | 0.001037748 |
|                                     | 0.000327831 | 0.000052357 | 0.000458761 |
|                                     | 0.000515728 | -           | 0.000037303 |
|                                     | -           | 0.000164847 | -           |
|                                     | 0.000063846 | -           | 0.000061914 |
|                                     | -           | 0.000171278 | -           |
|                                     | 0.000072488 | 0.000000848 | 0.000034080 |
|                                     | 0.000196130 | 0.000030741 | -           |
|                                     | -           | 0.000007371 | 0.000471339 |
|                                     | 0.000042319 | -           | -           |
|                                     |             | 0.000003944 | 0.000008997 |

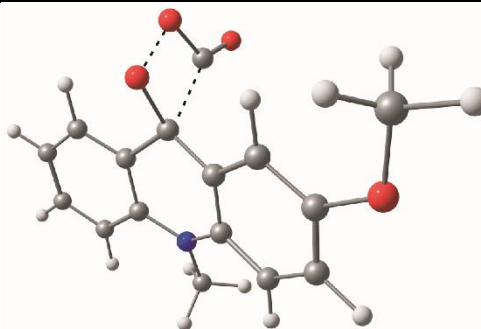

|             |             |             |
|-------------|-------------|-------------|
| -           | 0.000079330 | 0.000113513 |
| 0.000058044 | -           | 0.000251819 |
| -           | 0.000210436 | -           |
| 0.000106645 | 0.000014793 | 0.000207346 |
| 0.000137235 | 0.000134419 | -           |
| -           | -           | 0.000349135 |
| 0.000501716 | 0.000122199 | -           |
| -           | -           | 0.000219221 |
| 0.000105491 | -           | 0.000207619 |
| 0.000135585 | -           | 0.000239057 |
| 0.000113200 | -           | -           |

| Geom.No             |              |              |              |
|---------------------|--------------|--------------|--------------|
| 5=-784.655818845 Ha |              |              |              |
| Atom                | X            | Y            | Z            |
| C                   | 0.000007862  | -0.000005242 | -0.000007303 |
| C                   | 0.000004159  | 0.000002930  | 0.000013759  |
| C                   | -0.000025539 | 0.000011120  | 0.000005921  |
| C                   | 0.000023113  | -0.000015639 | -0.000005301 |
| C                   | 0.000010356  | 0.000024071  | -0.000000500 |
| C                   | -0.000007082 | -0.000020153 | 0.000004608  |
| C                   | 0.000027804  | -0.000007753 | -0.000011490 |
| C                   | -0.000014712 | 0.000020703  | 0.000005798  |
| C                   | -0.000000755 | 0.000001366  | -0.000027723 |
| N                   | 0.000000342  | 0.000007066  | 0.000033169  |
| C                   | -0.000022888 | -0.000031164 | 0.000015981  |
| C                   | 0.000018640  | 0.000014451  | 0.000015415  |
| C                   | -0.000008606 | 0.000008796  | -0.000021853 |
| C                   | -0.000003631 | -0.000010849 | 0.000004324  |
| O                   | -0.000005783 | -0.000030022 | -0.000020465 |
| C                   | 0.000008184  | 0.000013990  | 0.000022382  |
| C                   | -0.000008464 | -0.000014348 | -0.000010526 |
| H                   | 0.000002120  | 0.000012142  | 0.000001910  |
| H                   | 0.000005144  | 0.000008364  | 0.000001270  |
| H                   | -0.000001555 | -0.000009843 | -0.000006107 |
| H                   | -0.000002811 | 0.000004035  | 0.000000492  |
| H                   | -0.000003613 | 0.000006419  | -0.000008324 |
| H                   | -0.000001289 | 0.000004954  | 0.000000015  |
| H                   | -0.000005700 | 0.000011811  | -0.000007599 |
| H                   | 0.000002337  | 0.000002128  | 0.000004331  |
| H                   | 0.000001798  | 0.000004123  | 0.000002919  |
| H                   | 0.000004314  | 0.000005096  | 0.000012275  |
| H                   | -0.000000501 | 0.000001458  | 0.000001353  |
| H                   | -0.000003868 | -0.000006806 | -0.000004256 |

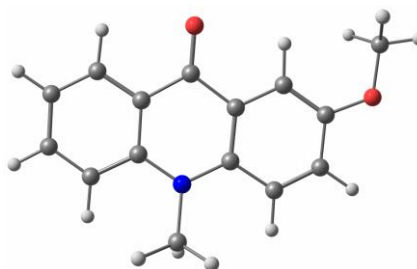

|   |              |              |              |
|---|--------------|--------------|--------------|
| H | -0.000001934 | -0.000010276 | 0.000001259  |
| H | 0.000002555  | -0.000002930 | -0.000015734 |

| Geom.No                  |              |              |              |
|--------------------------|--------------|--------------|--------------|
| 5*-S1= -784.537026295 Ha |              |              |              |
| Atom                     | X            | Y            | Z            |
| C                        | -0.000014247 | 0.000003349  | -0.000000569 |
| C                        | 0.000001418  | 0.000003113  | 0.000008734  |
| C                        | -0.000001261 | 0.000003136  | -0.000009659 |
| C                        | 0.000000035  | -0.000001941 | 0.000015778  |
| C                        | -0.000004948 | -0.000000756 | -0.000018941 |
| C                        | 0.000014012  | 0.000006416  | -0.000007865 |
| C                        | -0.000005961 | -0.000012697 | 0.000004496  |
| C                        | 0.000006652  | 0.000010405  | -0.000005840 |
| C                        | -0.000003337 | 0.000007307  | 0.000012585  |
| N                        | 0.000000841  | -0.000013732 | -0.000015142 |
| C                        | 0.000009698  | -0.000001164 | 0.000002131  |
| C                        | -0.000012290 | -0.000002622 | 0.000000883  |
| C                        | -0.000002234 | -0.000007141 | 0.000009284  |
| C                        | -0.000000728 | 0.000000991  | -0.000005020 |
| O                        | 0.000002040  | 0.000000982  | -0.000000483 |
| C                        | 0.000003606  | -0.000000379 | 0.000002576  |
| C                        | -0.000001583 | 0.000003063  | 0.000003260  |
| H                        | 0.000001660  | 0.000002603  | -0.000000185 |
| H                        | -0.000001803 | -0.000001798 | -0.000000535 |
| H                        | -0.000001241 | -0.000002059 | -0.000001650 |
| H                        | -0.000000351 | -0.000001916 | -0.000001566 |
| H                        | 0.000001947  | -0.000005877 | -0.000001235 |
| H                        | 0.000000353  | 0.000003245  | 0.000001576  |
| H                        | -0.000000219 | 0.000002463  | 0.000001481  |
| H                        | -0.000001805 | 0.000000628  | -0.000000064 |
| H                        | 0.000000781  | 0.000004048  | 0.000003691  |
| H                        | -0.000000816 | 0.000003215  | 0.000002376  |
| H                        | 0.000001805  | -0.000001800 | -0.000000210 |
| H                        | 0.000000811  | -0.000002278 | -0.000001522 |
| H                        | 0.000002110  | -0.000002221 | 0.000000074  |
| O                        | 0.000005056  | 0.000003418  | 0.000001563  |

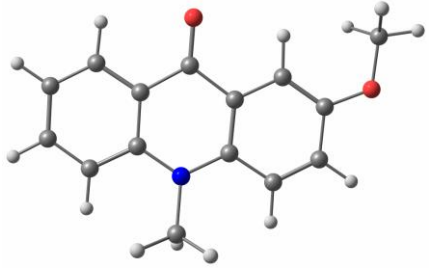

| Geom.No                 |              |              |              |
|-------------------------|--------------|--------------|--------------|
| 5*-T1=-784.569801133 Ha |              |              |              |
| Atom                    | X            | Y            | Z            |
| C                       | -0.000004567 | 0.000000790  | -0.000000533 |
| C                       | 0.000010252  | 0.000000232  | 0.000002182  |
| C                       | -0.000003662 | 0.000001559  | -0.000014026 |
| C                       | -0.000006748 | -0.000002571 | 0.000008818  |
| C                       | 0.000001986  | 0.000001025  | -0.000011263 |
| C                       | 0.000005059  | -0.000000050 | 0.000009372  |
| C                       | 0.000023679  | -0.000003011 | 0.000010361  |
| C                       | -0.000008404 | -0.000005956 | 0.000031072  |
| C                       | 0.000015077  | 0.000011590  | -0.000039440 |

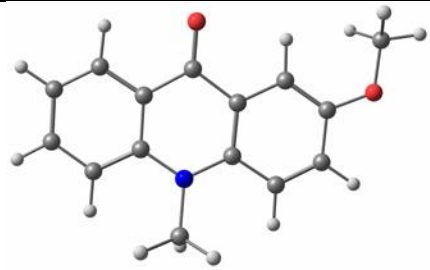

|   |              |              |              |
|---|--------------|--------------|--------------|
| N | -0.000016267 | -0.000002000 | 0.000019124  |
| C | -0.000008169 | 0.000000339  | -0.000021450 |
| C | 0.000005981  | 0.000000727  | 0.000006033  |
| C | 0.000012454  | 0.000003780  | -0.000010400 |
| C | -0.000006082 | -0.000003591 | 0.000021223  |
| O | -0.000007241 | -0.000003379 | 0.000003614  |
| C | 0.000004078  | -0.000000340 | -0.000003346 |
| C | 0.000005511  | 0.000000385  | 0.000000120  |
| H | 0.000002588  | 0.000002110  | -0.000002085 |
| H | -0.000003392 | 0.000000562  | -0.000001878 |
| H | -0.000001026 | -0.000001255 | 0.000001443  |
| H | 0.000001253  | -0.000002128 | -0.000002431 |
| H | 0.000001965  | -0.000003042 | 0.000004069  |
| H | -0.000003555 | 0.000001275  | -0.000001544 |
| H | -0.000001134 | 0.000001659  | 0.000001697  |
| H | -0.000000414 | 0.000002792  | 0.000001934  |
| H | -0.000001777 | 0.000002931  | 0.000000521  |
| H | -0.000000705 | 0.000002357  | 0.000000341  |
| H | 0.000000439  | -0.000001933 | -0.000000458 |
| H | 0.000000235  | -0.000002707 | -0.000001080 |
| H | 0.000001433  | -0.000001699 | -0.000000476 |
| O | -0.000018850 | -0.000000452 | -0.000011512 |

| Geom.No<br>6=-1528.41076993 Ha |              |              |              |
|--------------------------------|--------------|--------------|--------------|
| Atom                           | X            | Y            | Z            |
| C                              | -0.000004899 | 0.000000741  | 0.000001605  |
| C                              | -0.000008815 | 0.000001115  | -0.000003032 |
| C                              | 0.000007934  | 0.000002174  | -0.000003997 |
| C                              | -0.000006267 | 0.000002581  | 0.000004290  |
| C                              | -0.000009067 | 0.000001931  | -0.000010710 |
| C                              | 0.000003029  | 0.000002090  | -0.000004455 |
| S                              | 0.000000065  | -0.000003096 | -0.000002738 |
| C                              | -0.000000293 | 0.000005009  | 0.000000647  |
| O                              | -0.000003679 | -0.000001725 | -0.000001394 |
| H                              | -0.000000082 | 0.000000376  | 0.000001281  |
| C                              | -0.000001997 | -0.000004192 | 0.000003871  |
| C                              | 0.000001095  | 0.000000032  | -0.000001806 |
| C                              | 0.000001681  | 0.000001547  | 0.000001447  |
| N                              | 0.000002644  | -0.000004487 | -0.000000331 |
| C                              | 0.000000783  | -0.000000816 | 0.000003143  |
| C                              | -0.000000153 | -0.000001674 | 0.000001240  |
| C                              | 0.000004187  | -0.000000694 | 0.000000975  |
| C                              | 0.000003578  | 0.000000202  | -0.000000190 |
| C                              | 0.000003028  | 0.000002103  | -0.000001356 |
| C                              | 0.000000004  | 0.000000755  | -0.000000673 |
| C                              | 0.000000007  | -0.000002888 | 0.000003343  |
| C                              | -0.000001344 | -0.000003698 | 0.000003898  |
| C                              | -0.000002169 | -0.000002740 | 0.000003175  |
| C                              | -0.000002543 | -0.000002251 | 0.000001355  |
| O                              | 0.000002938  | 0.000002070  | -0.000001989 |

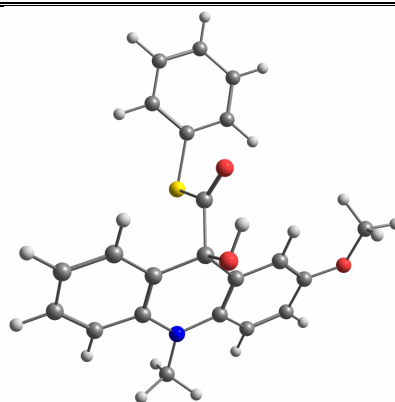

|   |              |              |              |
|---|--------------|--------------|--------------|
| C | 0.000002674  | 0.000003162  | -0.000003110 |
| O | -0.000000369 | 0.000001615  | -0.000000078 |
| C | 0.000002659  | -0.000001512 | 0.000004019  |
| H | 0.000000992  | -0.000003074 | 0.000003667  |
| H | -0.000001422 | -0.000004015 | 0.000004528  |
| H | -0.000003468 | -0.000003306 | 0.000003161  |
| H | -0.000003030 | -0.000001702 | 0.000001471  |
| H | 0.000000709  | 0.000000884  | -0.000000944 |
| H | 0.000004952  | 0.000001034  | -0.000000389 |
| H | 0.000004614  | -0.000000576 | 0.000001340  |
| H | 0.000002326  | -0.000003024 | 0.000004280  |
| H | 0.000003406  | -0.000001941 | 0.000002890  |
| H | 0.000003471  | -0.000002061 | 0.000002474  |
| H | -0.000005179 | 0.000001312  | -0.000001834 |
| H | -0.000002838 | 0.000002955  | -0.000002292 |
| H | -0.000000914 | 0.000003447  | -0.000005130 |
| H | -0.000001556 | 0.000002640  | -0.000002518 |
| H | -0.000001734 | 0.000001269  | -0.000000033 |
| H | 0.000002525  | 0.000003427  | -0.000003546 |
| H | 0.000001223  | 0.000002740  | -0.000003060 |
| H | 0.000001294  | 0.000002262  | -0.000002491 |

| Geom.No              |              |              |              |
|----------------------|--------------|--------------|--------------|
| 7= -1527.83331883 Ha |              |              |              |
| Atom                 | X            | Y            | Z            |
| C                    | -0.000003373 | -0.000002209 | 0.000001538  |
| C                    | 0.000002724  | 0.000001532  | -0.000003933 |
| C                    | -0.000002370 | 0.000003984  | -0.000000497 |
| C                    | -0.000001610 | 0.000001617  | -0.000006360 |
| C                    | -0.000004655 | -0.000000809 | -0.000007473 |
| C                    | -0.000003392 | 0.000000770  | -0.000003691 |
| C                    | -0.000035628 | -0.000041820 | -0.000036249 |
| C                    | 0.000004042  | 0.000004626  | 0.000004233  |
| C                    | 0.000000334  | -0.000000460 | -0.000001451 |
| N                    | 0.000003157  | -0.000000276 | -0.000003393 |
| C                    | 0.000005248  | 0.000002229  | -0.000001333 |
| C                    | 0.000006336  | 0.000006750  | -0.000002286 |
| C                    | -0.000008300 | -0.000007139 | 0.000014448  |
| C                    | 0.000004624  | 0.000001963  | -0.000001557 |
| C                    | -0.000001018 | 0.000039551  | 0.000023312  |
| O                    | -0.000006283 | -0.000004802 | -0.000007704 |
| O                    | 0.000029612  | 0.000004490  | 0.000023926  |
| C                    | -0.000001933 | 0.000002828  | -0.000003523 |
| S                    | -0.000004314 | -0.000010520 | -0.000011889 |
| C                    | 0.000009337  | 0.000002120  | 0.000010482  |
| C                    | 0.000002931  | -0.000000970 | 0.000002973  |
| C                    | -0.000005026 | -0.000002674 | 0.000000902  |
| C                    | -0.000002719 | -0.000004635 | 0.000004218  |
| C                    | 0.000001973  | -0.000002177 | 0.000003573  |
| C                    | -0.000004287 | 0.000001058  | 0.000007014  |
| H                    | 0.000000613  | -0.000001602 | -0.000001612 |

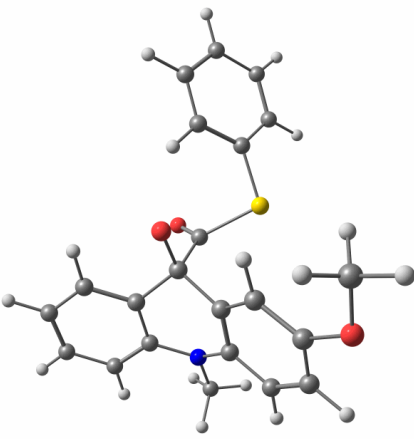

|   |              |              |              |
|---|--------------|--------------|--------------|
| O | 0.000031215  | -0.000000020 | 0.000000795  |
| H | -0.000002755 | -0.000001234 | 0.000001506  |
| H | 0.000007098  | 0.000002388  | 0.000001001  |
| H | 0.000005971  | 0.000004224  | -0.000003166 |
| H | -0.000002256 | 0.000001222  | -0.000009441 |
| H | -0.000003875 | -0.000001179 | -0.000001442 |
| H | -0.000006098 | -0.000000843 | -0.000003324 |
| H | -0.000004506 | 0.000000429  | -0.000006119 |
| H | -0.000000089 | 0.000001651  | -0.000004351 |
| H | 0.000002843  | 0.000002337  | -0.000003306 |
| H | 0.000002436  | 0.000002690  | -0.000005471 |
| H | -0.000002360 | -0.000001698 | 0.000003316  |
| H | -0.000004080 | -0.000002759 | 0.000005607  |
| H | -0.000004357 | -0.000003183 | 0.000004613  |
| H | -0.000006949 | -0.000002741 | 0.000001872  |
| C | -0.000021725 | 0.000004270  | -0.000002505 |
| H | 0.000009289  | 0.000000754  | 0.000005984  |
| H | 0.000008018  | -0.000000243 | 0.000004369  |
| H | 0.000006157  | 0.000000510  | 0.000006395  |

| Geom.No                    |              |              |              |
|----------------------------|--------------|--------------|--------------|
| TS-VIII= -1527.82770160 Ha |              |              |              |
| Atom                       | X            | Y            | Z            |
| C                          | -0.000001347 | -0.000002013 | 0.000000612  |
| C                          | -0.000004205 | 0.000001359  | -0.000000969 |
| C                          | 0.000003304  | -0.000005311 | -0.000004248 |
| C                          | -0.000002307 | 0.000000873  | 0.000000401  |
| C                          | -0.000001699 | -0.000001557 | -0.000002187 |
| C                          | -0.000001605 | -0.000002688 | -0.000000785 |
| C                          | 0.000033496  | -0.000546467 | -0.000110390 |
| C                          | -0.000000243 | 0.000000474  | 0.000001923  |
| C                          | 0.000000509  | -0.000006438 | 0.000004920  |
| N                          | -0.000001334 | 0.000018323  | 0.000001985  |
| C                          | 0.000002824  | 0.000005176  | -0.000000429 |
| C                          | 0.000000958  | 0.000002346  | 0.000003045  |
| C                          | 0.000005063  | -0.000001930 | 0.000002681  |
| C                          | -0.000000099 | 0.000004679  | 0.000002841  |
| O                          | -0.000005330 | -0.000005562 | -0.000004397 |
| C                          | 0.000003379  | -0.000000618 | -0.000003057 |
| O                          | 0.000001682  | 0.000008323  | 0.000005903  |
| C                          | 0.000005069  | -0.000001859 | 0.000004065  |
| C                          | -0.000994555 | 0.000792842  | 0.000890941  |
| O                          | -0.000000699 | 0.000003263  | -0.000004090 |
| S                          | 0.000968556  | -0.000246102 | -0.000773286 |
| C                          | -0.000005488 | -0.000010867 | -0.000013689 |
| C                          | 0.000001695  | 0.000001893  | 0.000003789  |
| C                          | -0.000004984 | 0.000001137  | -0.000001673 |
| C                          | -0.000007249 | -0.000008598 | -0.000007842 |
| C                          | 0.000005827  | -0.000000214 | 0.000000446  |
| C                          | -0.000007414 | -0.000002391 | -0.000005290 |
| H                          | 0.000001571  | 0.000002838  | 0.000005083  |

|   |              |              |              |
|---|--------------|--------------|--------------|
| H | 0.000001597  | 0.000000081  | 0.000002195  |
| H | 0.000004145  | 0.000004975  | 0.000002826  |
| H | 0.000001696  | 0.000004006  | 0.000001169  |
| H | 0.000000170  | 0.000001366  | -0.000003151 |
| H | -0.000001287 | -0.000003588 | 0.000000262  |
| H | -0.000002564 | -0.000003764 | -0.000000864 |
| H | -0.000001555 | -0.000001530 | -0.000001966 |
| H | 0.000000174  | 0.000003770  | -0.000002672 |
| H | 0.000001905  | 0.000004682  | -0.000003148 |
| H | 0.000001594  | 0.000003409  | -0.000001922 |
| H | -0.000003414 | -0.000002329 | -0.000002085 |
| H | -0.000003372 | -0.000005804 | -0.000000976 |
| H | -0.000002606 | -0.000007504 | -0.000000632 |
| H | -0.000000523 | -0.000003459 | -0.000000655 |
| H | 0.000003691  | 0.000001784  | 0.000005727  |
| H | 0.000001769  | 0.000001576  | 0.000004292  |
| H | 0.000003204  | 0.000001418  | 0.000005298  |

| Geom.No<br>8= -1049.52702930 Ha |              |              |              |
|---------------------------------|--------------|--------------|--------------|
| Atom                            | X            | Y            | Z            |
| C                               | 0.000016014  | 0.000000550  | -0.000021685 |
| C                               | 0.000014752  | 0.000027341  | 0.000039228  |
| C                               | -0.000017750 | 0.000023787  | -0.000000483 |
| C                               | 0.000006488  | -0.000001662 | -0.000010959 |
| C                               | 0.000009147  | 0.000005503  | 0.000017789  |
| C                               | -0.000022902 | -0.000010861 | -0.000004702 |
| C                               | -0.000018718 | 0.000012991  | -0.000014783 |
| C                               | 0.000008855  | -0.000008746 | -0.000018364 |
| C                               | 0.000013622  | 0.000020640  | 0.000006987  |
| N                               | 0.000013312  | -0.000053962 | -0.000009351 |
| C                               | -0.000005759 | 0.000006650  | 0.000000202  |
| C                               | 0.000015341  | -0.000002933 | 0.000021602  |
| C                               | -0.000006901 | -0.000006527 | -0.000010959 |
| C                               | 0.000002199  | -0.000003728 | -0.000002498 |
| O                               | 0.000005244  | 0.000019739  | -0.000007053 |
| C                               | -0.000005440 | -0.000023068 | -0.000009394 |
| C                               | -0.000009919 | 0.000004948  | -0.000003027 |
| C                               | 0.000008040  | -0.000009304 | 0.000062440  |
| O                               | 0.000012711  | 0.000004702  | 0.000005468  |
| O                               | -0.000002666 | 0.000002745  | 0.000000072  |
| O                               | 0.000013102  | -0.000014173 | -0.000008413 |
| O                               | -0.000021200 | -0.000006789 | -0.000038511 |
| H                               | -0.000007710 | -0.000005886 | 0.000004956  |
| H                               | 0.000003360  | 0.000000599  | 0.000000638  |
| H                               | 0.000000301  | -0.000002141 | -0.000000740 |
| H                               | -0.000003961 | 0.000000643  | -0.000005670 |
| H                               | 0.000004079  | 0.000000212  | 0.000003930  |
| H                               | -0.000000966 | -0.000001297 | -0.000002698 |

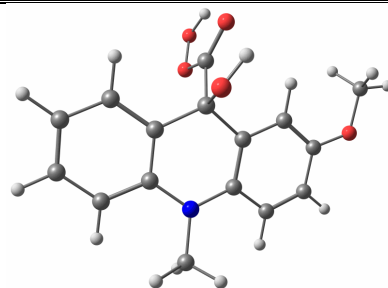



|   |              |              |              |
|---|--------------|--------------|--------------|
| H | -0.000003019 | -0.000001753 | -0.000011482 |
| H | 0.000004589  | -0.000004739 | -0.000001479 |
| H | -0.000001391 | -0.000002647 | 0.000006191  |
| H | -0.000004325 | -0.000000285 | 0.000006448  |
| H | -0.000011244 | 0.000002725  | 0.000004830  |
| H | -0.000001719 | 0.000004706  | 0.000000461  |
| H | -0.000002969 | 0.000006880  | -0.000000039 |
| H | -0.000001123 | 0.000008391  | -0.000004362 |
| H | -0.000001477 | 0.000006748  | 0.000005412  |

| Geom.No                   |              |              |              | 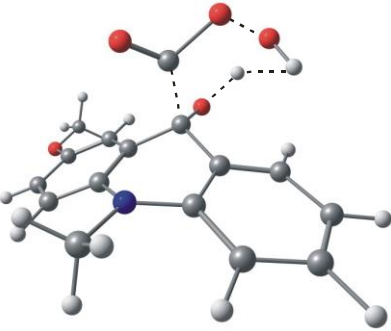 |
|---------------------------|--------------|--------------|--------------|--------------------------------------------------------------------------------------|
| 8-TS-X= -1049.46413855 Ha |              |              |              |                                                                                      |
| Atom                      | X            | Y            | Z            |                                                                                      |
| C                         | 0.000003131  | 0.000004229  | 0.000010831  |                                                                                      |
| C                         | 0.000000146  | -0.000007223 | -0.000004871 |                                                                                      |
| C                         | -0.000001242 | 0.000007406  | 0.000002650  |                                                                                      |
| C                         | 0.000007611  | 0.000000335  | -0.000003985 |                                                                                      |
| C                         | -0.000002628 | 0.000000512  | -0.000000842 |                                                                                      |
| C                         | -0.000006649 | -0.000002262 | 0.000006394  |                                                                                      |
| N                         | -0.000011207 | 0.000020933  | 0.000012826  |                                                                                      |
| C                         | 0.000020076  | -0.000017378 | -0.000017961 |                                                                                      |
| C                         | 0.000000291  | 0.000000913  | 0.000010836  |                                                                                      |
| C                         | -0.007484680 | -0.030785992 | 0.004611327  |                                                                                      |
| C                         | 0.000000686  | -0.000012338 | -0.000013925 |                                                                                      |
| C                         | -0.000011749 | -0.000018158 | -0.000035669 |                                                                                      |
| C                         | 0.000005428  | 0.000013179  | 0.000028268  |                                                                                      |
| C                         | -0.000004062 | -0.000008021 | -0.000011883 |                                                                                      |
| O                         | -0.000039432 | 0.000015555  | 0.000013259  |                                                                                      |
| C                         | 0.000032927  | -0.000017244 | -0.000010590 |                                                                                      |
| O                         | 0.033979430  | -0.057539583 | -0.021012848 |                                                                                      |
| C                         | 0.007488510  | 0.030761639  | -0.004628054 |                                                                                      |
| O                         | -0.002034903 | -0.000995767 | 0.000621520  |                                                                                      |
| O                         | 0.002011681  | 0.000985032  | -0.000661893 |                                                                                      |
| C                         | 0.000002952  | -0.000006976 | 0.000000705  |                                                                                      |
| O                         | 0.000006306  | 0.000013914  | -0.000004069 |                                                                                      |
| H                         | -0.000001337 | -0.000005935 | -0.000002782 |                                                                                      |
| H                         | -0.000000555 | -0.000003518 | 0.000001600  |                                                                                      |
| H                         | -0.000005717 | 0.000006278  | 0.000003685  |                                                                                      |
| H                         | -0.000002239 | 0.000000927  | 0.000002462  |                                                                                      |
| H                         | -0.000001514 | 0.000004504  | -0.000001528 |                                                                                      |
| H                         | 0.000000844  | 0.000003882  | 0.000000039  |                                                                                      |

|   |              |              |              |
|---|--------------|--------------|--------------|
| H | -0.000000363 | -0.000000072 | 0.000000881  |
| H | -0.000003078 | -0.000003437 | 0.000001556  |
| H | -0.000000293 | -0.000001089 | 0.000001902  |
| H | -0.000000431 | -0.000001314 | 0.000000083  |
| H | -0.033955640 | 0.057581781  | 0.021039704  |
| H | 0.000000654  | -0.000008058 | 0.000005380  |
| H | -0.000009640 | 0.000018900  | 0.000035690  |
| H | 0.000007841  | -0.000008289 | 0.000003024  |
| H | 0.000008846  | 0.000002731  | -0.000003720 |

| Geom.No<br>9= -898.37584698 Ha |              |              |              |
|--------------------------------|--------------|--------------|--------------|
| Atom                           | X            | Y            | Z            |
| C                              | -0.000042747 | 0.000001605  | 0.000036150  |
| C                              | 0.000004751  | -0.000007079 | -0.000014416 |
| C                              | -0.000030053 | -0.000001070 | 0.000013079  |
| C                              | 0.000096068  | -0.000007244 | -0.000025425 |
| C                              | -0.000028042 | 0.000025794  | 0.000008581  |
| C                              | 0.000071623  | 0.000016750  | -0.000047774 |
| C                              | -0.000034532 | 0.000017786  | 0.000035200  |
| C                              | 0.000000633  | -0.000002896 | -0.000018682 |
| C                              | 0.000001299  | -0.000009396 | 0.000005867  |
| N                              | 0.000003641  | 0.000005258  | 0.000002839  |
| C                              | -0.000004935 | 0.000004241  | 0.000002032  |
| C                              | 0.000000573  | -0.000001424 | -0.000005757 |
| C                              | 0.000015872  | 0.000000639  | -0.000005065 |
| C                              | -0.000014769 | -0.000001039 | 0.000021397  |
| C                              | -0.000000501 | 0.000006703  | -0.000004983 |
| C                              | 0.000047213  | -0.000035823 | -0.000067391 |
| O                              | 0.000009347  | 0.000031906  | 0.000010046  |
| O                              | -0.000025444 | -0.000015909 | 0.000037322  |
| O                              | -0.000050047 | -0.000057329 | -0.000037285 |
| H                              | -0.000016081 | -0.000001780 | -0.000010267 |
| H                              | -0.000011677 | 0.000004442  | 0.000030761  |
| H                              | -0.000000541 | 0.000005977  | 0.000008359  |
| H                              | 0.000009633  | 0.000003726  | 0.000005880  |
| H                              | -0.000009682 | -0.000001677 | -0.000008418 |
| H                              | 0.000000729  | -0.000002873 | -0.000008354 |
| H                              | 0.000010526  | 0.000001275  | -0.000002599 |
| H                              | 0.000008261  | 0.000000081  | -0.000003805 |
| H                              | -0.000001859 | -0.000008576 | 0.000011390  |

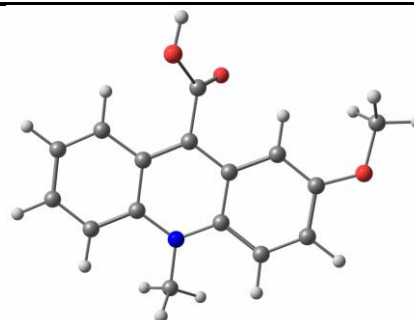

|   |              |              |              |
|---|--------------|--------------|--------------|
| H | 0.000001100  | 0.000008479  | 0.000005180  |
| H | -0.000004713 | -0.000004416 | -0.000001856 |
| C | -0.000000547 | 0.000031205  | 0.000054505  |
| H | 0.000011379  | 0.000000893  | -0.000011991 |
| H | -0.000012535 | -0.000001103 | -0.000002176 |
| H | -0.000003941 | -0.000007124 | -0.000012345 |

| $R_2=CL$ $R_4=H$ , $R_6=H$ $R_2'=OCH_3$ |              |              |              |
|-----------------------------------------|--------------|--------------|--------------|
| Geom.No                                 |              |              |              |
| 1= -1911.97584791 Ha                    |              |              |              |
| Atom                                    | X            | Y            | Z            |
| C                                       | 0.000005514  | -0.000005110 | 0.000001692  |
| C                                       | -0.000054238 | 0.000004760  | 0.000018249  |
| C                                       | 0.000002965  | -0.000002545 | -0.000002028 |
| C                                       | -0.000001473 | 0.000002396  | 0.000000234  |
| C                                       | 0.000000512  | 0.000003719  | 0.000000528  |
| C                                       | 0.000001749  | 0.000001352  | 0.000000178  |
| S                                       | 0.000045787  | 0.000004677  | -0.000037416 |
| C                                       | 0.000012819  | -0.000006269 | 0.000027893  |
| O                                       | -0.000003696 | 0.000000591  | -0.000007373 |
| C                                       | 0.000000994  | 0.000011482  | -0.000003238 |
| C                                       | -0.000003029 | -0.000004707 | 0.000000640  |
| C                                       | -0.000004579 | -0.000004011 | -0.000000575 |
| N                                       | 0.000006427  | 0.000001624  | -0.000000456 |
| C                                       | -0.000003196 | 0.000000977  | 0.000001336  |
| C                                       | -0.000002339 | -0.000006706 | -0.000005590 |
| C                                       | 0.000002177  | 0.000001567  | 0.000000889  |
| C                                       | -0.000001483 | -0.000002574 | 0.000001931  |
| C                                       | 0.000006049  | 0.000003378  | -0.000002868 |
| C                                       | 0.000001745  | 0.000004500  | 0.000002840  |
| C                                       | -0.000000616 | 0.000003255  | 0.000002027  |
| C                                       | 0.000002476  | -0.000001064 | -0.000002967 |
| C                                       | -0.000002985 | -0.000001188 | -0.000001583 |
| C                                       | 0.000002588  | 0.000001701  | 0.000000278  |
| O                                       | -0.000005913 | -0.000005829 | 0.000004741  |
| C                                       | 0.000002199  | -0.000002582 | -0.000000047 |
| C                                       | -0.000001344 | -0.000003908 | 0.000004110  |

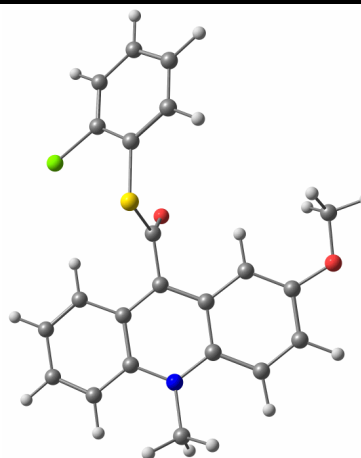

|    |              |              |              |
|----|--------------|--------------|--------------|
| H  | -0.000001826 | 0.000005093  | 0.000001007  |
| H  | -0.000003389 | 0.000001850  | -0.000003455 |
| H  | -0.000001119 | 0.000000342  | -0.000002796 |
| H  | 0.000000224  | -0.000000006 | -0.000001083 |
| H  | -0.000000635 | -0.000000077 | -0.000001452 |
| H  | 0.000001429  | -0.000001730 | -0.000001073 |
| H  | -0.000000486 | -0.000000659 | 0.000000676  |
| H  | 0.000001471  | 0.000002118  | -0.000000716 |
| H  | -0.000000083 | -0.000003208 | -0.000005478 |
| H  | 0.000000023  | -0.000001504 | -0.000001711 |
| H  | -0.000001742 | -0.000002585 | 0.000000649  |
| H  | 0.000000692  | 0.000001349  | 0.000001219  |
| H  | 0.000000791  | 0.000001344  | 0.000000963  |
| H  | -0.000000074 | 0.000000982  | -0.000000848 |
| Cl | -0.000003538 | -0.000000135 | 0.000004386  |
| H  | -0.000000459 | -0.000000941 | 0.000002601  |
| H  | -0.000000007 | -0.000000916 | 0.000001717  |
| H  | -0.000000380 | -0.000000805 | 0.000001969  |

| Geom.No<br>2= -2063.13028762 Ha |              |              |              |
|---------------------------------|--------------|--------------|--------------|
| Atom                            | X            | Y            | Z            |
| C                               | -0.000000456 | 0.000001295  | 0.000005036  |
| C                               | -0.000007383 | -0.000003636 | -0.000000468 |
| C                               | 0.000002914  | -0.000000323 | 0.000002446  |
| C                               | -0.000003646 | -0.000002266 | 0.000002356  |
| C                               | -0.000001924 | 0.000001332  | -0.000001145 |
| C                               | 0.000000813  | 0.000000702  | 0.000000846  |
| C                               | -0.000004658 | 0.000006294  | -0.000004461 |
| C                               | -0.000001210 | 0.000000432  | 0.000012996  |
| C                               | -0.000003640 | -0.000006042 | 0.000009018  |
| N                               | 0.000005602  | 0.000006157  | -0.000010673 |
| C                               | 0.000005377  | 0.000001795  | -0.000007385 |
| C                               | -0.000009398 | 0.000000241  | -0.000001596 |
| C                               | 0.000005120  | -0.000001851 | 0.000012630  |
| C                               | 0.000004774  | 0.000000201  | -0.000014859 |
| C                               | -0.000013491 | 0.000029493  | 0.000004464  |
| O                               | 0.000013001  | -0.000003382 | 0.000001898  |
| O                               | 0.000003644  | -0.000009760 | 0.000012472  |
| O                               | 0.000000959  | 0.000004519  | -0.000015642 |
| C                               | -0.000004874 | 0.000000582  | -0.000000214 |
| O                               | -0.000000867 | 0.000000271  | -0.000001615 |
| C                               | 0.000000644  | -0.000002137 | -0.000000448 |
| S                               | 0.000008608  | -0.000022121 | -0.000006957 |
| C                               | 0.000005404  | 0.000002257  | 0.000007778  |
| C                               | -0.000006237 | -0.000003483 | -0.000003223 |
| C                               | 0.000002293  | 0.000003034  | 0.000002357  |
| C                               | 0.000001834  | 0.000000848  | -0.000003126 |
| C                               | -0.000001400 | -0.000002644 | 0.000000637  |

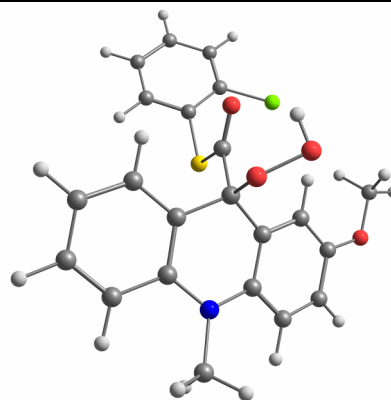

|    |              |              |              |
|----|--------------|--------------|--------------|
| C  | 0.000000251  | 0.000000231  | -0.000001118 |
| Cl | -0.000001544 | -0.000000756 | -0.000002577 |
| H  | 0.000000765  | 0.000001995  | 0.000003496  |
| H  | 0.000000382  | 0.000000962  | 0.000001468  |
| H  | -0.000001686 | 0.000001280  | -0.000001044 |
| H  | -0.000001388 | -0.000000744 | 0.000000321  |
| H  | -0.000001325 | 0.000001082  | -0.000001003 |
| H  | 0.000000040  | -0.000001429 | -0.000000165 |
| H  | 0.000002976  | 0.000000387  | -0.000001099 |
| H  | 0.000001307  | -0.000001545 | -0.000002545 |
| H  | -0.000003628 | -0.000001461 | 0.000003006  |
| H  | 0.000001139  | -0.000000073 | 0.000001230  |
| H  | 0.000001122  | -0.000000423 | -0.000001303 |
| H  | -0.000000018 | -0.000001127 | -0.000001194 |
| H  | 0.000000439  | -0.000000158 | -0.000000699 |
| H  | 0.000000276  | -0.000000180 | -0.000000984 |
| H  | -0.000001994 | -0.000002920 | 0.000001531  |
| H  | -0.000000058 | 0.000000980  | -0.000000671 |
| H  | 0.000000489  | 0.000001529  | -0.000000249 |
| H  | 0.000000656  | 0.000000558  | 0.000000478  |

| Geom.No<br>6= -1988.00040002 Ha |              |              |              |
|---------------------------------|--------------|--------------|--------------|
| Atom                            | X            | Y            | Z            |
| C                               | -0.000016123 | 0.000007690  | 0.000016174  |
| C                               | 0.000024761  | -0.000010500 | -0.000027176 |
| C                               | -0.000003744 | -0.000004690 | 0.000001143  |
| C                               | -0.000000955 | 0.000005594  | 0.000007727  |
| C                               | 0.000001501  | 0.000010988  | -0.000002757 |
| C                               | 0.000010178  | -0.000009786 | 0.000004382  |
| C                               | -0.000047725 | -0.000007671 | 0.000043867  |
| C                               | 0.000013289  | 0.000022569  | -0.000026727 |
| C                               | -0.000011578 | -0.000008447 | -0.000005584 |
| N                               | 0.000014928  | 0.000006783  | 0.000012423  |
| C                               | 0.000002609  | 0.000002341  | 0.000003318  |
| C                               | 0.000001780  | 0.000000110  | 0.000001999  |
| C                               | -0.000003440 | -0.000002601 | -0.000000351 |
| C                               | 0.000001374  | -0.000004963 | -0.000001024 |
| C                               | -0.000002014 | -0.000000477 | -0.000007202 |
| O                               | -0.000000439 | -0.000016282 | -0.000005224 |
| O                               | 0.000005476  | 0.000005037  | -0.000008024 |
| C                               | -0.000003575 | 0.000015282  | -0.000005508 |
| S                               | 0.000035446  | -0.000001440 | 0.000020810  |
| C                               | -0.000038884 | 0.000009006  | -0.000016097 |
| C                               | 0.000001881  | -0.000000302 | -0.000001895 |
| C                               | 0.000007067  | -0.000003474 | 0.000002365  |
| C                               | -0.000006932 | -0.000009120 | 0.000003402  |
| C                               | -0.000000928 | -0.000007162 | -0.000008089 |
| C                               | 0.000024658  | 0.000001151  | -0.000011596 |

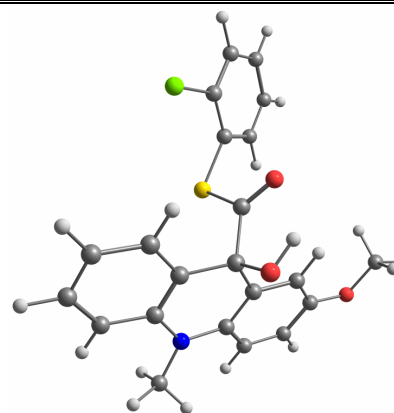

|    |              |              |              |
|----|--------------|--------------|--------------|
| Cl | -0.000006236 | -0.000011231 | 0.000008259  |
| H  | 0.000002582  | 0.000000316  | -0.000002106 |
| H  | -0.000000745 | -0.000001030 | -0.000000685 |
| H  | -0.000001398 | -0.000001029 | -0.000000725 |
| H  | -0.000006053 | -0.000003115 | 0.000001300  |
| H  | -0.000002185 | 0.000001737  | -0.000000127 |
| O  | -0.000007768 | 0.000013477  | -0.000005984 |
| H  | 0.000002373  | 0.000005553  | 0.000000937  |
| H  | 0.000003582  | 0.000002962  | 0.000001274  |
| H  | 0.000000459  | 0.000002750  | 0.000002497  |
| H  | 0.000004653  | -0.000000864 | 0.000001333  |
| H  | 0.000002799  | 0.000003497  | 0.000000296  |
| H  | 0.000000578  | -0.000009256 | -0.000000317 |
| H  | 0.000001596  | -0.000007091 | -0.000002719 |
| H  | -0.000000398 | -0.000004243 | -0.000001316 |
| H  | 0.000002303  | -0.000002442 | 0.000001404  |
| H  | -0.000005628 | 0.000003456  | 0.000002899  |
| C  | 0.000008632  | -0.000007577 | 0.000004379  |
| H  | -0.000001300 | 0.000006460  | -0.000000024 |
| H  | -0.000002415 | 0.000003203  | -0.000001931 |
| H  | -0.000004045 | 0.000004831  | 0.000001001  |

| Geom.No<br>7= -1987.42880981 Ha |              |              |              |
|---------------------------------|--------------|--------------|--------------|
| Atom                            | X            | Y            | Z            |
| C                               | 0.000003239  | -0.000001666 | -0.000004981 |
| C                               | -0.000000211 | -0.000007384 | -0.000002646 |
| C                               | 0.000000174  | -0.000006201 | -0.000001753 |
| C                               | -0.000002169 | 0.000000384  | 0.000001773  |
| C                               | 0.000002770  | -0.000002011 | 0.000003026  |
| C                               | -0.000003323 | -0.000003230 | 0.000000932  |
| C                               | 0.000028800  | 0.000085594  | 0.000055126  |
| C                               | 0.000016866  | -0.000004626 | 0.000001657  |
| C                               | -0.000009558 | 0.000010096  | -0.000014414 |
| N                               | 0.000000886  | 0.000003004  | -0.000001190 |
| C                               | -0.000005604 | -0.000013137 | 0.000013949  |
| C                               | 0.000019977  | 0.000000602  | -0.000000986 |
| C                               | 0.000005040  | 0.000001716  | -0.000023423 |
| C                               | -0.000015245 | -0.000006181 | 0.000018146  |
| C                               | 0.000034210  | -0.000053281 | -0.000039659 |
| O                               | -0.000010235 | -0.000002331 | -0.000000173 |
| O                               | -0.000039047 | -0.000008028 | -0.000017705 |
| S                               | 0.000002642  | 0.000004105  | -0.000002800 |
| C                               | -0.000068052 | 0.000030534  | -0.000018469 |
| C                               | 0.000015086  | -0.000014666 | 0.000015993  |
| C                               | 0.000012915  | -0.000017173 | -0.000001015 |
| C                               | -0.000000328 | -0.000003637 | -0.000004495 |
| C                               | 0.000012310  | -0.000012835 | 0.000003826  |
| C                               | -0.000033178 | 0.000027863  | -0.000006264 |
| C                               | 0.000038940  | -0.000002027 | 0.000074133  |
| Cl                              | 0.000017796  | -0.000030609 | -0.000045663 |

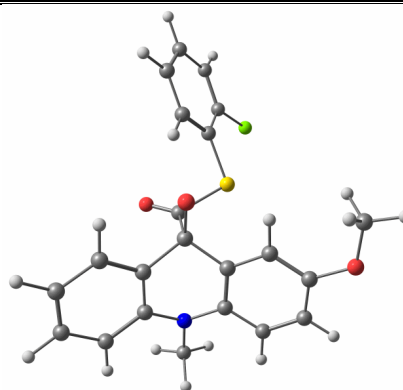

|   |              |              |              |
|---|--------------|--------------|--------------|
| O | -0.000032552 | 0.000023865  | 0.000012996  |
| H | 0.000003646  | 0.000004586  | -0.000000815 |
| H | -0.000004704 | 0.000001760  | 0.000001200  |
| H | -0.000001380 | 0.000004046  | 0.000000005  |
| H | 0.000001515  | 0.000001584  | 0.000002712  |
| H | -0.000001422 | -0.000001647 | 0.000002723  |
| H | -0.000000039 | -0.000002554 | -0.000000297 |
| H | -0.000000332 | -0.000001127 | -0.000000679 |
| H | 0.000001157  | 0.000002234  | -0.000002793 |
| H | 0.000001012  | 0.000003622  | -0.000002486 |
| H | 0.000000121  | 0.000001700  | 0.000000645  |
| H | -0.000017582 | 0.000006368  | -0.000028034 |
| H | -0.000002705 | -0.000000397 | -0.000000780 |
| H | -0.000001774 | -0.000001102 | -0.000001112 |
| H | 0.000003342  | -0.000003194 | 0.000000256  |
| C | 0.000033559  | -0.000017970 | 0.000008351  |
| H | -0.000003202 | 0.000000193  | 0.000001289  |
| H | -0.000003037 | 0.000000979  | 0.000002713  |
| H | -0.000000325 | 0.000002178  | 0.000001180  |

| Geom.No<br>TS-VIII= -1987.42374554 Ha |              |              |              |
|---------------------------------------|--------------|--------------|--------------|
| Atom                                  | X            | Y            | Z            |
| C                                     | 0.000009101  | 0.000003073  | 0.000006154  |
| C                                     | -0.000026951 | 0.000000658  | 0.000003787  |
| C                                     | 0.000009151  | -0.000002991 | -0.000011754 |
| C                                     | -0.000002130 | 0.000001084  | 0.000006881  |
| C                                     | 0.000001216  | 0.000002445  | -0.000002382 |
| C                                     | 0.000002822  | 0.000000601  | 0.000001836  |
| S                                     | 0.002020643  | 0.002607214  | 0.001897847  |
| C                                     | -0.005363842 | -0.000612347 | -0.004210210 |
| O                                     | 0.000000027  | -0.000002842 | -0.000006779 |
| Cl                                    | -0.000001374 | -0.000000235 | 0.000007928  |
| C                                     | 0.003363863  | -0.001972729 | 0.002299522  |
| C                                     | -0.000001387 | -0.000005611 | 0.000006741  |
| C                                     | -0.000008749 | 0.000011844  | -0.000001152 |
| N                                     | 0.000018589  | -0.000006910 | 0.000007397  |
| C                                     | -0.000003781 | -0.000003414 | -0.000004536 |
| C                                     | -0.000003838 | -0.000007001 | -0.000003307 |
| C                                     | 0.000004546  | -0.000006327 | -0.000003060 |
| C                                     | -0.000002059 | -0.000002953 | 0.000000828  |
| C                                     | 0.000001780  | 0.000004223  | 0.000000195  |
| C                                     | -0.000000169 | -0.000004610 | 0.000000989  |
| C                                     | 0.000002736  | 0.000001858  | -0.000001133 |
| C                                     | 0.000002342  | 0.000000832  | -0.000004905 |
| C                                     | -0.000000232 | -0.000001818 | -0.000004708 |
| C                                     | 0.000003357  | 0.000007439  | 0.000005675  |
| O                                     | -0.000002727 | -0.000003088 | -0.000001918 |
| C                                     | 0.000000857  | -0.000001282 | 0.000002951  |

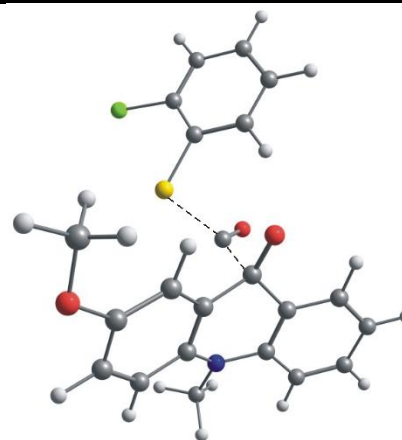

|   |              |              |              |
|---|--------------|--------------|--------------|
| O | -0.000011087 | -0.000009205 | 0.000013351  |
| C | -0.000013583 | 0.000001824  | -0.000001313 |
| H | -0.000001305 | 0.000002451  | 0.000000966  |
| H | -0.000001691 | -0.000002286 | -0.000000189 |
| H | -0.000002095 | -0.000003066 | -0.000000050 |
| H | -0.000000368 | -0.000000218 | -0.000006495 |
| H | 0.000001273  | -0.000000036 | -0.000001908 |
| H | 0.000001936  | 0.000001854  | -0.000001569 |
| H | 0.000001135  | 0.000000758  | -0.000002103 |
| H | 0.000001557  | 0.000001548  | -0.000000282 |
| H | 0.000000976  | -0.000000578 | -0.000000946 |
| H | 0.000001245  | -0.000000629 | -0.000003066 |
| H | -0.000001028 | 0.000000400  | 0.000002932  |
| H | 0.000000190  | 0.000001470  | 0.000002396  |
| H | -0.000001029 | 0.000001702  | 0.000001530  |
| H | 0.000003243  | -0.000001931 | -0.000002155 |
| H | -0.000001051 | -0.000000781 | 0.000002429  |
| H | -0.000000941 | -0.000000766 | 0.000001643  |
| H | -0.000001167 | 0.000000375  | 0.000001944  |

| $R_2=CH_3$ $R_4=H$ , $R_6=H$ $R_2'=OCH_3$ |              |              |              |
|-------------------------------------------|--------------|--------------|--------------|
| Geom.No                                   |              |              |              |
| I= -1491.70525299 Ha                      |              |              |              |
| Atom                                      | X            | Y            | Z            |
| C                                         | -0.000004019 | -0.000000730 | 0.000007995  |
| C                                         | -0.000001571 | -0.000001682 | -0.000001493 |
| C                                         | -0.000004184 | -0.000000885 | -0.000002777 |
| C                                         | -0.000003952 | -0.000003414 | -0.000008118 |
| C                                         | -0.000009826 | -0.000002492 | 0.000009453  |
| C                                         | 0.000008350  | -0.000001587 | -0.000011505 |
| C                                         | 0.000004349  | -0.000004856 | -0.000001173 |
| C                                         | -0.000004614 | 0.000000891  | -0.000002127 |
| C                                         | 0.000007445  | 0.000000958  | -0.000005514 |
| N                                         | 0.000002273  | -0.000002416 | -0.000004572 |
| C                                         | -0.000001693 | -0.000002529 | 0.000007526  |
| C                                         | 0.000007616  | 0.000001466  | -0.000001412 |
| C                                         | 0.000001361  | 0.000002270  | -0.000001836 |
| C                                         | -0.000000434 | 0.000001838  | 0.000004891  |
| C                                         | -0.000014375 | 0.000028235  | 0.000000087  |
| O                                         | 0.000000856  | -0.000007779 | 0.000002987  |
| C                                         | 0.000004011  | -0.000003466 | -0.000007005 |
| S                                         | 0.000011581  | -0.000014108 | 0.000000462  |
| C                                         | -0.000005662 | -0.000002744 | 0.000002269  |
| C                                         | -0.000000253 | 0.000004208  | 0.000003434  |
| C                                         | 0.000002202  | 0.000005291  | 0.000004525  |
| C                                         | -0.000001744 | 0.000005322  | 0.000001518  |
| C                                         | -0.000003669 | 0.000000139  | 0.000001304  |

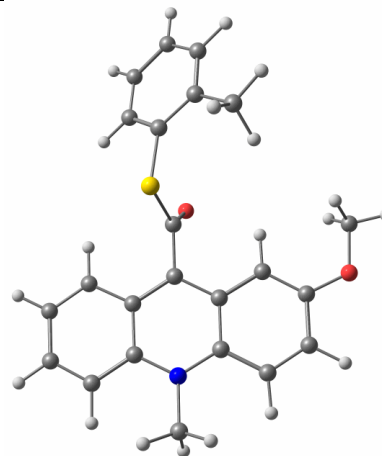



|   |              |              |              |
|---|--------------|--------------|--------------|
| C | 0.000005740  | 0.000004296  | 0.000004118  |
| C | 0.000002001  | 0.000000891  | 0.000000308  |
| H | -0.000000809 | -0.000002086 | -0.000000841 |
| H | 0.000002675  | 0.000001384  | 0.000000092  |
| H | 0.000003215  | 0.000002821  | 0.000002067  |
| H | 0.000001908  | 0.000002099  | 0.000003007  |
| H | 0.000001427  | -0.000000311 | 0.000001849  |
| O | -0.000014994 | -0.000003409 | -0.000010639 |
| H | 0.000000338  | -0.000004813 | -0.000006753 |
| H | 0.000001316  | -0.000002138 | -0.000001085 |
| H | 0.000005603  | 0.000000826  | -0.000006427 |
| H | 0.000000283  | -0.000002765 | -0.000002071 |
| H | 0.000002996  | -0.000005486 | -0.000006080 |
| H | -0.000000414 | 0.000002779  | 0.000002484  |
| H | -0.000001727 | 0.000003502  | 0.000004679  |
| H | -0.000002157 | 0.000004218  | 0.000004912  |
| H | -0.000000919 | 0.000002421  | 0.000002777  |
| H | -0.000000103 | 0.000001242  | 0.000001422  |
| H | 0.000001749  | 0.000002326  | 0.000000309  |
| H | -0.000000698 | -0.000000004 | -0.000000924 |
| C | 0.000017460  | -0.000004930 | 0.000018646  |
| H | -0.000009877 | -0.000002333 | -0.000003437 |
| H | -0.000005492 | 0.000001467  | -0.000003877 |
| H | -0.000003571 | -0.000003925 | -0.000003456 |

| Geom.No<br>2= -1642.85987970 Ha |              |              |              |
|---------------------------------|--------------|--------------|--------------|
| Atom                            | X            | Y            | Z            |
| C                               | 0.000005442  | -0.000006259 | -0.000010519 |
| C                               | 0.000002669  | 0.000001301  | 0.000012197  |
| C                               | -0.000011606 | 0.000003578  | 0.000001760  |
| C                               | 0.000006540  | -0.000000976 | -0.000002815 |
| C                               | 0.000004180  | -0.000007002 | 0.000001866  |
| C                               | -0.000019629 | -0.000000853 | 0.000000434  |
| C                               | 0.000001623  | -0.000001019 | -0.000010582 |
| C                               | -0.000009027 | 0.000004802  | 0.000002871  |
| C                               | 0.000002330  | 0.000002698  | 0.000002462  |
| N                               | 0.000003477  | -0.000013009 | 0.000002487  |
| C                               | -0.000000735 | 0.000000250  | -0.000001806 |
| C                               | -0.000002604 | 0.000001471  | -0.000000191 |
| C                               | 0.000000713  | 0.000003700  | 0.000001912  |
| C                               | 0.000002883  | 0.000002147  | -0.000001631 |
| C                               | -0.000006125 | -0.000007104 | 0.000005385  |
| O                               | 0.000002229  | 0.000005261  | -0.000000314 |
| O                               | -0.000005447 | -0.000001306 | 0.000000937  |
| O                               | -0.000000748 | 0.000000271  | 0.000002772  |
| C                               | -0.000003247 | 0.000001861  | -0.000000047 |
| O                               | 0.000012720  | -0.000007972 | 0.000005433  |
| C                               | -0.000006909 | 0.000003407  | -0.000000561 |
| S                               | 0.000002558  | 0.000003262  | -0.000003385 |
| C                               | -0.000000871 | 0.000002605  | 0.000000459  |

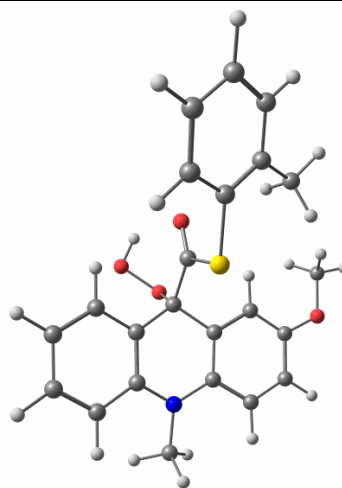

|   |              |              |              |
|---|--------------|--------------|--------------|
| C | 0.000004705  | -0.000000573 | 0.000001054  |
| C | 0.000001751  | 0.000001534  | -0.000002235 |
| C | 0.000002668  | 0.000002448  | -0.000003186 |
| C | 0.000002863  | 0.000002818  | -0.000001885 |
| C | 0.000002670  | 0.000002926  | -0.000002952 |
| C | 0.000001576  | 0.000001135  | -0.000000980 |
| H | -0.000002254 | 0.000000652  | 0.000001254  |
| H | -0.000001190 | 0.000002811  | 0.000000009  |
| H | -0.000000737 | 0.000003660  | -0.000000118 |
| H | -0.000001189 | 0.000002961  | -0.000000234 |
| H | -0.000001475 | 0.000000891  | -0.000000614 |
| H | -0.000001859 | -0.000002894 | 0.000001071  |
| H | -0.000001219 | -0.000004264 | 0.000005188  |
| H | -0.000002039 | -0.000001194 | -0.000000150 |
| H | -0.000001298 | -0.000003465 | -0.000000594 |
| H | -0.000000281 | -0.000002164 | 0.000000637  |
| H | 0.000002440  | 0.000002478  | -0.000001812 |
| H | 0.000002796  | 0.000004157  | -0.000002837 |
| H | 0.000003555  | 0.000003897  | -0.000002386 |
| H | 0.000002735  | 0.000001917  | -0.000001895 |
| H | 0.000002699  | 0.000004435  | 0.000000302  |
| H | 0.000001759  | -0.000000289 | -0.000000944 |
| H | 0.000001964  | -0.000000927 | 0.000000216  |
| H | -0.000000574 | -0.000000658 | -0.000000797 |
| H | 0.000000748  | -0.000003396 | 0.000002997  |
| H | -0.000002743 | -0.000004415 | 0.000001911  |
| H | 0.000001517  | -0.000005599 | -0.000000143 |

| Geom.No<br>6= -1567.73156204 Ha |              |              |              |
|---------------------------------|--------------|--------------|--------------|
| Atom                            | X            | Y            | Z            |
| C                               | 0.000002644  | -0.000001787 | -0.000001788 |
| C                               | 0.000001155  | -0.000000229 | -0.000010593 |
| C                               | -0.000007004 | 0.000003208  | 0.000003959  |
| C                               | 0.000001359  | -0.000000030 | -0.000004477 |
| C                               | 0.000001799  | -0.000000082 | 0.000000605  |
| C                               | -0.000003317 | -0.000001892 | -0.000001101 |
| S                               | 0.000001687  | 0.000003237  | 0.000000651  |
| C                               | -0.000004673 | -0.000018882 | -0.000001672 |
| O                               | 0.000001271  | 0.000005845  | -0.000001009 |
| C                               | 0.000002208  | -0.000000989 | -0.000001577 |
| C                               | 0.000009243  | 0.000023353  | 0.000003810  |
| C                               | -0.000000079 | -0.000005364 | -0.000002922 |
| C                               | -0.000005147 | 0.000007648  | 0.000002980  |
| N                               | -0.000000162 | -0.000006189 | 0.000001941  |
| C                               | -0.000000108 | 0.000001828  | -0.000008144 |
| C                               | -0.000003419 | -0.000000640 | 0.000001705  |
| C                               | 0.000005032  | 0.000000697  | 0.000006507  |
| C                               | 0.000001414  | -0.000001887 | -0.000002331 |
| C                               | -0.000001659 | -0.000002137 | -0.000009481 |
| C                               | -0.000000794 | 0.000002177  | 0.000006687  |

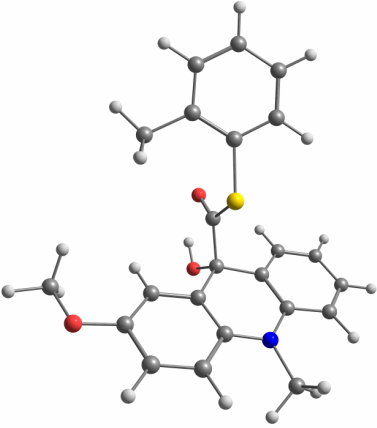

|   |              |              |              |
|---|--------------|--------------|--------------|
| C | 0.000000055  | -0.000002324 | 0.000002888  |
| C | -0.000002535 | 0.000000264  | 0.000000285  |
| C | 0.000001593  | -0.000003142 | -0.000003739 |
| C | 0.000003503  | -0.000001781 | 0.000004333  |
| O | -0.000006666 | -0.000009867 | 0.000008243  |
| C | -0.000002124 | -0.000004002 | 0.000002302  |
| H | 0.000000133  | -0.000002032 | 0.000001558  |
| H | -0.000000826 | -0.000002752 | 0.000000392  |
| H | -0.000000663 | -0.000002030 | 0.000000505  |
| H | -0.000001261 | 0.000000504  | -0.000001415 |
| H | 0.000001023  | 0.000001020  | 0.000000175  |
| O | 0.000005925  | -0.000000348 | 0.000005951  |
| H | 0.000001932  | 0.000003340  | 0.000004008  |
| H | -0.000000905 | 0.000001130  | -0.000001149 |
| H | 0.000000535  | -0.000000153 | 0.000001322  |
| H | 0.000000807  | -0.000002489 | -0.000000193 |
| H | 0.000001013  | -0.000000764 | 0.000003430  |
| H | 0.000001779  | 0.000001675  | -0.000004084 |
| H | 0.000000221  | 0.000000201  | -0.000001456 |
| H | -0.000000533 | -0.000000995 | -0.000001670 |
| H | -0.000000090 | -0.000002414 | -0.000001486 |
| H | -0.000000812 | -0.000001012 | -0.000000489 |
| H | -0.000000149 | 0.000000364  | -0.000001969 |
| H | 0.000000562  | 0.000002369  | -0.000001906 |
| H | -0.000000450 | 0.000003078  | -0.000000288 |
| C | -0.000006880 | 0.000007402  | -0.000000555 |
| H | -0.000000475 | 0.000002503  | 0.000001720  |
| H | 0.000001433  | 0.000001526  | 0.000000026  |
| H | 0.000002406  | 0.000002845  | -0.000000489 |

| Geom.No<br>7= -1567.15318939 Ha |              |              |              |
|---------------------------------|--------------|--------------|--------------|
| Atom                            | X            | Y            | Z            |
| C                               | 0.000001184  | -0.000001736 | 0.000001354  |
| C                               | 0.000004875  | 0.000003728  | 0.000000573  |
| C                               | -0.000002574 | 0.000004022  | 0.000007091  |
| C                               | 0.000001137  | 0.000001391  | -0.000001455 |
| C                               | 0.000000080  | -0.000000967 | 0.000000797  |
| C                               | -0.000000540 | -0.000000574 | -0.000001014 |
| C                               | -0.000039844 | -0.000041839 | -0.000029621 |
| C                               | 0.000005807  | 0.000003447  | 0.000007230  |
| C                               | -0.000001634 | -0.000000983 | 0.000002043  |
| N                               | 0.000003587  | -0.000004345 | -0.000003412 |
| C                               | 0.000002206  | 0.000002144  | 0.000001971  |
| C                               | 0.000000953  | 0.000003716  | -0.000001605 |
| C                               | -0.000021613 | -0.000021300 | 0.000022000  |
| C                               | 0.000002481  | 0.000005652  | -0.000003843 |
| C                               | 0.000012002  | 0.000038082  | 0.000003307  |
| O                               | -0.000006279 | -0.000005720 | -0.000006170 |
| O                               | 0.000032344  | 0.000007356  | 0.000013788  |
| C                               | -0.000003690 | 0.000003496  | 0.000001622  |

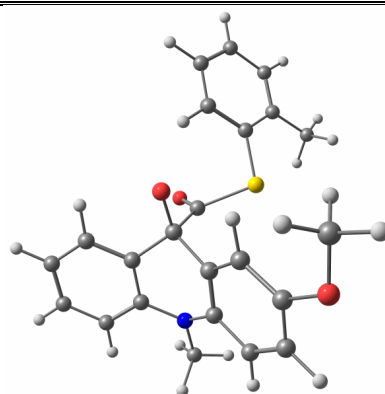

|   |              |              |              |
|---|--------------|--------------|--------------|
| S | -0.000018399 | -0.000006765 | -0.000000436 |
| C | 0.000008536  | -0.000001844 | 0.000005259  |
| C | 0.000006674  | -0.000003984 | 0.000003400  |
| C | -0.000003337 | -0.000002397 | -0.000005029 |
| C | -0.000000711 | -0.000004494 | -0.000003228 |
| C | 0.000002369  | 0.000000722  | -0.000002806 |
| C | -0.000005233 | 0.000000672  | -0.000001997 |
| C | -0.000003094 | -0.000000896 | 0.000000168  |
| O | 0.000038417  | 0.000015972  | -0.000003784 |
| H | 0.000000292  | -0.000001122 | 0.000000861  |
| H | 0.000003090  | 0.000002324  | 0.000003103  |
| H | 0.000001861  | 0.000003647  | 0.000001560  |
| H | -0.000000571 | 0.000000552  | 0.000000174  |
| H | -0.000000411 | -0.000001074 | -0.000000140 |
| H | 0.000000551  | -0.000001152 | 0.000000162  |
| H | 0.000000271  | 0.000000156  | 0.000000580  |
| H | -0.000000375 | 0.000001770  | 0.000001045  |
| H | -0.000000340 | 0.000002210  | 0.000002149  |
| H | 0.000000516  | 0.000002600  | 0.000001860  |
| H | -0.000002796 | -0.000001610 | -0.000002579 |
| H | -0.000001323 | -0.000002146 | -0.000002314 |
| H | -0.000000234 | -0.000003130 | -0.000001327 |
| H | -0.000003709 | -0.000000000 | -0.000001175 |
| C | -0.000022769 | 0.000001835  | -0.000007581 |
| H | 0.000004621  | 0.000001038  | 0.000002005  |
| H | 0.000004486  | -0.000000799 | 0.000000629  |
| H | 0.000004478  | 0.000000621  | 0.000003327  |
| H | -0.000003346 | -0.000001092 | -0.000002929 |
| H | 0.000001558  | -0.000000566 | -0.000003697 |
| H | -0.000001555 | 0.000003383  | -0.000001918 |

| Geom.No<br>TS-VIII= -1567.14780310 Ha |              |              |              |
|---------------------------------------|--------------|--------------|--------------|
| Atom                                  | X            | Y            | Z            |
| C                                     | 0.000005590  | 0.000003953  | -0.000004136 |
| C                                     | 0.000006256  | -0.000008272 | 0.000008300  |
| C                                     | -0.000000746 | 0.000000537  | 0.000001478  |
| C                                     | -0.000000662 | -0.000000002 | -0.000000600 |
| C                                     | 0.000002551  | -0.000001247 | 0.000005393  |
| C                                     | -0.000005799 | 0.000000610  | 0.000000869  |
| S                                     | -0.000479903 | -0.000702686 | -0.000499474 |
| C                                     | 0.001174866  | 0.000350014  | 0.000944493  |
| O                                     | -0.000007999 | 0.000011241  | -0.000005319 |
| C                                     | 0.000003336  | -0.000001212 | -0.000001887 |
| C                                     | -0.000702342 | 0.000333639  | -0.000429266 |
| C                                     | 0.000007802  | -0.000003004 | -0.000019986 |
| C                                     | -0.000012629 | 0.000005587  | 0.000004052  |
| N                                     | 0.000020395  | -0.000003053 | 0.000006976  |
| C                                     | -0.000014619 | -0.000013081 | -0.000009316 |
| C                                     | 0.000009212  | 0.000021132  | 0.000003300  |
| C                                     | -0.000001551 | -0.000001471 | 0.000001014  |

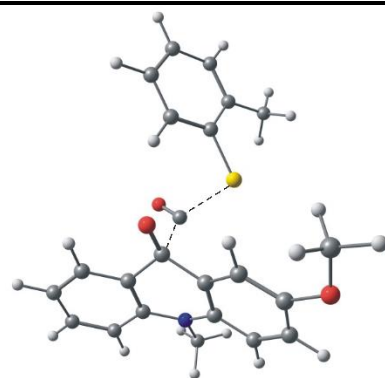

|   |              |              |              |
|---|--------------|--------------|--------------|
| C | 0.000003216  | -0.000002240 | 0.000001550  |
| C | 0.000007647  | -0.000007234 | 0.000007346  |
| C | -0.000008276 | 0.000002898  | 0.000000470  |
| C | 0.000002357  | 0.000005164  | 0.000002304  |
| C | -0.000000264 | -0.000000920 | -0.000003143 |
| C | 0.000001635  | 0.000006871  | 0.000001370  |
| C | -0.000003490 | -0.000007249 | -0.000006185 |
| O | -0.000012265 | 0.000005375  | -0.000009704 |
| C | 0.000008164  | -0.000001014 | 0.000007826  |
| O | 0.000006723  | 0.000005362  | -0.000003091 |
| C | -0.000006531 | -0.000001015 | -0.000003245 |
| H | 0.000002019  | 0.000000102  | 0.000003363  |
| H | 0.000000289  | 0.000000760  | -0.000000004 |
| H | 0.000000502  | 0.000001842  | -0.000001822 |
| H | -0.000000755 | 0.000001102  | -0.000002535 |
| H | 0.000001108  | 0.000001569  | -0.000000522 |
| H | 0.000000441  | 0.000001297  | -0.000002472 |
| H | 0.000000267  | 0.000002435  | -0.000004327 |
| H | -0.000000529 | -0.000000429 | -0.000002236 |
| H | -0.000000284 | -0.000002784 | -0.000002300 |
| H | -0.000000886 | 0.000000234  | -0.000001842 |
| H | 0.000000456  | -0.000001423 | 0.000001396  |
| H | 0.000000160  | 0.000000196  | 0.000000705  |
| H | 0.000002425  | 0.000000988  | 0.000001302  |
| H | -0.000003341 | -0.000001080 | 0.000000357  |
| H | 0.000001096  | 0.000000253  | 0.000002315  |
| H | -0.000000548 | -0.000001748 | 0.000000517  |
| H | -0.000000411 | 0.000003178  | 0.000002311  |
| H | -0.000001464 | -0.000001655 | 0.000000760  |
| H | -0.000001942 | -0.000001539 | 0.000002390  |
| H | -0.000001279 | -0.000001981 | 0.000001254  |

| $R_2=C(CH_3)_3$ $R_4=H$ , $R_6=H$ $R_7=OCH_3$ |              |              |              |
|-----------------------------------------------|--------------|--------------|--------------|
| Geom.No                                       |              |              |              |
| 1= -1609.64285040 Ha                          |              |              |              |
| Atom                                          | X            | Y            | Z            |
| C                                             | 0.000000305  | -0.000000495 | 0.000002897  |
| C                                             | 0.000002081  | -0.000000903 | 0.000001350  |
| C                                             | 0.000000681  | -0.000000442 | 0.000001134  |
| C                                             | 0.000001388  | 0.000001466  | 0.000001993  |
| C                                             | 0.000000955  | 0.000000716  | 0.000002014  |
| C                                             | 0.000003072  | -0.000001359 | 0.000002213  |
| C                                             | -0.000000629 | 0.000003502  | -0.000008294 |
| C                                             | -0.000003753 | -0.000000438 | -0.000001361 |
| C                                             | -0.000006223 | 0.000004466  | 0.000002903  |
| N                                             | -0.000000271 | 0.000003159  | 0.000003606  |
| C                                             | -0.000001836 | 0.000002765  | -0.000001341 |
| C                                             | 0.000000057  | 0.000001037  | 0.000002144  |
| C                                             | -0.000008927 | 0.000004445  | 0.000006968  |
| C                                             | -0.000000679 | 0.000001098  | -0.000005478 |
| C                                             | 0.000007341  | -0.000011790 | 0.000014553  |

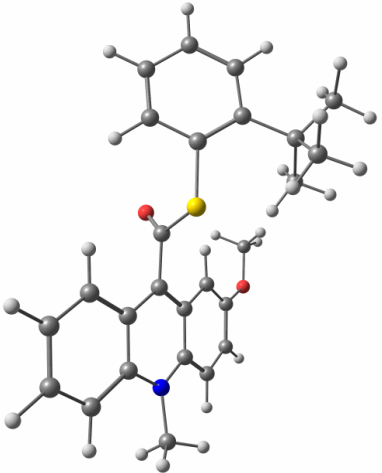

|   |              |              |              |
|---|--------------|--------------|--------------|
| O | -0.00003621  | 0.000005819  | -0.000003970 |
| C | -0.000002399 | 0.000001654  | 0.000004825  |
| O | 0.000003027  | 0.000001409  | -0.000009583 |
| C | -0.000018519 | -0.000000814 | -0.000000117 |
| S | 0.000003214  | -0.000003209 | -0.000001193 |
| C | -0.000001824 | 0.000005107  | -0.000007502 |
| C | 0.000001010  | 0.000003588  | 0.000003972  |
| C | -0.000002889 | -0.000002300 | -0.000008902 |
| C | 0.000003642  | -0.000004245 | -0.000001153 |
| C | 0.000002524  | -0.000005429 | 0.000000398  |
| C | 0.000003297  | -0.000005640 | -0.000005460 |
| C | 0.000000009  | 0.000000746  | 0.000002622  |
| C | 0.000004777  | -0.000001012 | -0.000000661 |
| C | 0.000000271  | -0.000005429 | -0.000004503 |
| C | 0.000005418  | 0.000001861  | 0.000004764  |
| H | -0.000000902 | 0.000001944  | 0.000002523  |
| H | 0.000001809  | -0.000000755 | 0.000003719  |
| H | 0.000002671  | -0.000001024 | 0.000002163  |
| H | 0.000001210  | -0.000001341 | 0.000000162  |
| H | 0.000001110  | -0.000000186 | -0.000000983 |
| H | -0.000005725 | 0.000005342  | -0.000000584 |
| H | -0.000000668 | 0.000002521  | 0.000000326  |
| H | -0.000001585 | 0.000002430  | 0.000006090  |
| H | -0.000001515 | 0.000003051  | 0.000003118  |
| H | -0.000003426 | 0.000004198  | 0.000005739  |
| H | 0.000002139  | -0.000003659 | -0.000004629 |
| H | 0.000003002  | -0.000004544 | -0.000004986 |
| H | 0.000003019  | -0.000004297 | -0.000003994 |
| H | 0.000002009  | -0.000002689 | -0.000000946 |
| H | -0.000000790 | -0.000002945 | -0.000003212 |
| H | 0.000002609  | -0.000004577 | 0.000001129  |
| H | 0.000000488  | -0.000000262 | -0.000004621 |
| H | -0.000001041 | 0.000000850  | -0.000001339 |
| H | 0.000000050  | 0.000001944  | 0.000002002  |
| H | -0.000002734 | 0.000001215  | -0.000000297 |
| H | 0.000001955  | -0.000001344 | 0.000001171  |
| H | 0.000001425  | -0.000000358 | 0.000000899  |
| H | 0.000001860  | -0.000002325 | 0.000002941  |
| H | -0.000003174 | 0.000004465  | -0.000005373 |
| H | 0.000001849  | -0.000001233 | 0.000001695  |
| H | 0.000002858  | 0.000004246  | -0.000001550 |

| Geom.No              |   |   |   |  |
|----------------------|---|---|---|--|
| 2= -1760.79577458 Ha |   |   |   |  |
| Atom                 | X | Y | Z |  |

|   |              |              |              |
|---|--------------|--------------|--------------|
| C | -0.000003443 | 0.000001609  | 0.000000066  |
| C | -0.000005958 | 0.000002535  | 0.000004837  |
| C | -0.000001707 | 0.000002091  | -0.000002248 |
| C | -0.000003540 | 0.000004176  | -0.000000656 |
| C | -0.000002038 | 0.000003446  | -0.000000535 |
| C | -0.000002752 | 0.000002404  | 0.000000315  |
| C | 0.000009489  | -0.000012963 | -0.000001961 |
| C | -0.000006112 | -0.000000595 | -0.000001527 |
| C | -0.000000918 | -0.000000029 | 0.000004122  |
| N | -0.000002436 | 0.000004628  | -0.000002424 |
| C | -0.000000593 | 0.000001699  | -0.000003732 |
| C | -0.000005136 | -0.000000671 | 0.000000207  |
| C | 0.000001210  | -0.000001127 | 0.000004171  |
| C | 0.000000895  | -0.000001471 | -0.000003927 |
| C | -0.000011181 | 0.000007354  | -0.000004757 |
| O | 0.000004719  | -0.000004371 | 0.000004464  |
| O | -0.000008031 | 0.000007191  | -0.000003164 |
| O | -0.000004854 | -0.000002186 | 0.000001314  |
| C | -0.000003026 | 0.000003745  | -0.000001135 |
| O | -0.000003525 | 0.000002805  | -0.000002342 |
| C | -0.000000966 | 0.000000716  | -0.000000123 |
| S | 0.000003126  | -0.000007758 | -0.000000051 |
| C | -0.000000856 | 0.000005129  | 0.000004948  |
| C | 0.000005905  | -0.000004337 | 0.000001197  |
| C | 0.000002554  | -0.000007626 | -0.000000795 |
| C | 0.000001325  | -0.000003414 | 0.000002553  |
| C | 0.000007580  | -0.000002209 | 0.000001681  |
| C | 0.000002572  | -0.000005645 | -0.000002630 |
| C | 0.000004384  | 0.000000047  | 0.000000054  |
| C | 0.000002796  | 0.000000700  | 0.000001025  |
| C | 0.000004546  | 0.000000995  | 0.000001279  |
| C | 0.000004807  | -0.000001018 | 0.000000571  |
| H | 0.000000803  | -0.000004517 | 0.000000944  |
| H | -0.000002719 | 0.000004766  | -0.000001215 |
| H | -0.000002898 | 0.000004896  | -0.000001429 |
| H | -0.000002047 | -0.000000547 | -0.000000213 |
| H | -0.000001606 | -0.000002901 | 0.000000672  |
| H | -0.000001469 | -0.000002118 | -0.000000415 |
| H | -0.000000854 | 0.000000021  | -0.000000116 |
| H | -0.000001297 | 0.000002415  | -0.000000824 |
| H | -0.000004086 | 0.000003947  | -0.000000943 |
| H | -0.000004192 | 0.000003880  | -0.000000681 |
| H | -0.000002046 | 0.000004790  | -0.000000630 |
| H | 0.000002828  | -0.000006171 | 0.000001919  |
| H | 0.000004661  | -0.000005454 | 0.000001350  |
| H | 0.000004896  | -0.000003036 | 0.000000904  |
| H | -0.000003438 | -0.000002253 | -0.000000577 |
| H | 0.000004649  | 0.000000907  | 0.000000109  |
| H | 0.000006089  | -0.000000736 | 0.000000543  |
| H | 0.000004308  | -0.000001014 | 0.000000598  |
| H | 0.000001966  | 0.000000983  | 0.000000127  |

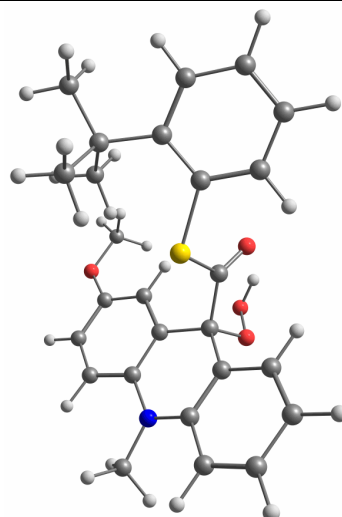

|   |              |              |              |
|---|--------------|--------------|--------------|
| H | 0.000001344  | -0.000000620 | 0.000000131  |
| H | 0.000001299  | 0.000001026  | -0.000000167 |
| H | 0.000004508  | 0.000002215  | 0.000000265  |
| H | 0.000003298  | 0.000000914  | 0.000000260  |
| H | 0.000005167  | 0.000000584  | 0.000000409  |
| H | -0.000002863 | 0.000001647  | -0.000000758 |
| H | -0.000001610 | 0.000000216  | -0.000000306 |
| H | -0.000003527 | 0.000000309  | -0.000000756 |

| Geom.No<br>6= -1685.66762639 Ha |              |              |              |
|---------------------------------|--------------|--------------|--------------|
| Atom                            | X            | Y            | Z            |
| C                               | -0.000001480 | 0.000000001  | -0.000001491 |
| C                               | 0.000003101  | 0.000001296  | 0.000000504  |
| C                               | -0.000001050 | 0.000004098  | -0.000004969 |
| C                               | 0.000000127  | 0.000001776  | -0.000002482 |
| C                               | -0.000000724 | 0.000001076  | -0.000002008 |
| C                               | -0.000002362 | 0.000000266  | -0.000000609 |
| C                               | -0.000002572 | -0.000001024 | 0.000000719  |
| C                               | 0.000002068  | 0.000000812  | 0.000000989  |
| C                               | 0.000004107  | 0.000002770  | -0.000003142 |
| N                               | -0.000000322 | -0.000003396 | 0.000003771  |
| C                               | 0.000002542  | 0.000001081  | -0.000000749 |
| C                               | 0.000005154  | 0.000000996  | -0.000000057 |
| C                               | 0.000003479  | 0.000002396  | -0.000002601 |
| C                               | 0.000004562  | 0.000000046  | -0.000000378 |
| C                               | 0.000001806  | -0.000002927 | 0.000004155  |
| O                               | -0.000002781 | -0.000001339 | -0.000000719 |
| O                               | 0.000002375  | 0.000001649  | 0.000001252  |
| C                               | -0.000000050 | 0.000003720  | -0.000002442 |
| O                               | 0.000001270  | -0.000000728 | 0.000002382  |
| C                               | 0.000003072  | -0.000001007 | 0.000003192  |
| S                               | 0.000000340  | 0.000000478  | -0.000001899 |
| C                               | -0.000005163 | -0.000000122 | 0.000005098  |
| C                               | -0.000000878 | -0.000003001 | -0.000001508 |
| C                               | -0.000002618 | -0.000001315 | -0.000000252 |
| C                               | -0.000004332 | -0.000001832 | 0.000001938  |
| C                               | -0.000003276 | -0.000002513 | -0.000000587 |
| C                               | -0.000001374 | -0.000001376 | -0.000000786 |
| C                               | 0.000000238  | 0.000000912  | 0.000002112  |
| C                               | -0.000001176 | -0.000001609 | 0.000000418  |
| C                               | -0.000000919 | 0.000000510  | -0.000000574 |
| C                               | -0.000000349 | -0.000000844 | 0.000000522  |
| H                               | -0.000000682 | 0.000001879  | -0.000003301 |
| H                               | -0.000002007 | 0.000001433  | -0.000002901 |
| H                               | -0.000002247 | 0.000000106  | -0.000001395 |
| H                               | -0.000001446 | -0.000000921 | 0.000000260  |
| H                               | 0.000001105  | -0.000000379 | 0.000002089  |
| H                               | 0.000003819  | 0.000002236  | -0.000000479 |
| H                               | 0.000003520  | 0.000003082  | -0.000001960 |
| H                               | 0.000001224  | 0.000001519  | -0.000002769 |

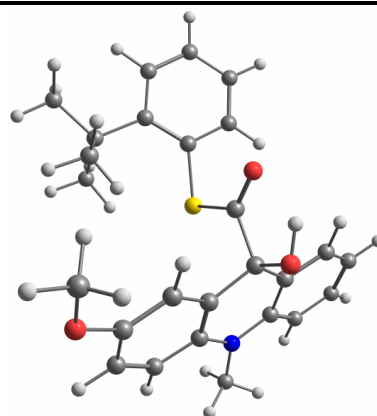



|   |              |              |              |
|---|--------------|--------------|--------------|
| H | 0.000001698  | 0.000003085  | -0.000003640 |
| H | 0.000001521  | 0.000003834  | -0.000001799 |
| H | -0.000002973 | -0.000001752 | 0.000001757  |
| H | -0.000004293 | -0.000002594 | 0.000001204  |
| H | -0.000004427 | -0.000001967 | 0.000000587  |
| H | -0.000002532 | -0.000001513 | -0.000000164 |
| H | -0.000001718 | -0.000001212 | -0.000000641 |
| H | -0.000000396 | -0.000001068 | 0.000000338  |
| H | -0.000002032 | -0.000000993 | 0.000000377  |
| H | -0.000001181 | -0.000001751 | 0.000001783  |
| H | -0.000000296 | 0.000000630  | -0.000000101 |
| H | -0.000000930 | 0.000000255  | -0.000000727 |
| H | -0.000001007 | 0.000000202  | -0.000000468 |
| H | 0.000001530  | -0.000001412 | 0.000001723  |
| H | 0.000000260  | -0.000001325 | 0.000001787  |
| H | 0.000001726  | -0.000000937 | 0.000001163  |
| H | 0.000003419  | -0.000000247 | 0.000002639  |
| H | 0.000002134  | -0.000000587 | 0.000002430  |
| H | 0.000003397  | -0.000000452 | 0.000002408  |

| Geom.No<br>7= -1685.09123221 Ha |              |              |              |
|---------------------------------|--------------|--------------|--------------|
| Atom                            | X            | Y            | Z            |
| C                               | 0.000001022  | -0.000002302 | -0.000006433 |
| C                               | -0.000004609 | -0.000001878 | 0.000000536  |
| C                               | 0.000003280  | -0.000002115 | -0.000005835 |
| C                               | -0.000003636 | -0.000001855 | -0.000000344 |
| C                               | -0.000001214 | -0.000003175 | -0.000000572 |
| C                               | -0.000003602 | -0.000004750 | -0.000000338 |
| C                               | -0.000012785 | 0.000014104  | 0.000002052  |
| C                               | 0.000004583  | 0.000006260  | 0.000003779  |
| C                               | -0.000006350 | -0.000004300 | 0.000002830  |
| N                               | 0.000002022  | 0.000002278  | -0.000001589 |
| C                               | 0.000001761  | -0.000002964 | 0.000005748  |
| C                               | 0.000010449  | 0.000004180  | 0.000000740  |
| C                               | -0.000008854 | -0.000002088 | 0.000000982  |
| C                               | -0.000007180 | -0.000004482 | 0.000007037  |
| C                               | 0.000031080  | 0.000016162  | -0.000015242 |
| O                               | -0.000012586 | -0.000020132 | 0.000009686  |
| O                               | -0.000000376 | -0.000012205 | -0.000001189 |
| C                               | 0.000003898  | 0.000000398  | -0.000005449 |
| S                               | -0.000018192 | -0.000008262 | 0.000004457  |

|   |              |              |              |
|---|--------------|--------------|--------------|
| C | -0.00002524  | 0.000017752  | -0.00003190  |
| C | 0.000015120  | -0.000016007 | 0.000014874  |
| C | -0.000014734 | 0.000014462  | -0.000004676 |
| C | 0.000007411  | -0.000013957 | -0.000001721 |
| C | -0.000018882 | 0.000017317  | -0.000002835 |
| C | 0.000022066  | -0.000016437 | 0.000012825  |
| C | -0.000004378 | 0.000000423  | -0.000014387 |
| O | -0.000006592 | 0.000004823  | 0.000001847  |
| H | -0.000000652 | 0.000002488  | 0.000000327  |
| H | -0.000001205 | 0.000002919  | 0.000001357  |
| H | 0.000001069  | 0.000003448  | -0.000003041 |
| H | -0.000000471 | -0.000002386 | -0.000001673 |
| H | -0.000003759 | -0.000004946 | 0.000002591  |
| H | -0.000004414 | -0.000004360 | -0.000001335 |
| H | -0.000002844 | -0.000004177 | -0.000002854 |
| H | -0.000000077 | 0.000000585  | -0.000003914 |
| H | 0.000001446  | 0.000002926  | -0.000002631 |
| H | -0.000001163 | 0.000000359  | -0.000001309 |
| H | 0.000002386  | -0.000004703 | -0.000006742 |
| H | -0.000001987 | -0.000000595 | -0.000001863 |
| H | -0.000002736 | -0.000004479 | 0.000001093  |
| H | -0.000008085 | 0.000001376  | -0.000003016 |
| C | 0.000016547  | 0.000000530  | 0.000012276  |
| H | -0.000000136 | 0.000000882  | 0.000006465  |
| H | -0.000001722 | 0.000003276  | 0.000004169  |
| H | -0.000001833 | -0.000001213 | 0.000001672  |
| C | 0.000000918  | -0.000001996 | -0.000003151 |
| C | 0.000000404  | -0.000005705 | 0.000010750  |
| C | 0.000025504  | 0.000009236  | 0.000006427  |
| H | -0.000000028 | 0.000002527  | -0.000000455 |
| H | 0.000002947  | 0.000002563  | -0.000000949 |
| H | 0.000002744  | 0.000004347  | -0.000001411 |
| H | 0.000003049  | 0.000003644  | -0.000002672 |
| H | 0.000001673  | 0.000001450  | 0.000002211  |
| H | 0.000000405  | 0.000000917  | -0.000000898 |
| H | -0.000005238 | 0.000008450  | -0.000006436 |
| H | -0.000001836 | 0.000002391  | -0.000001082 |
| H | 0.000002899  | -0.000001004 | -0.000007497 |

| Geom.No<br>TS-VIII= -1685.08630081 Ha |   |   |   |
|---------------------------------------|---|---|---|
| Atom                                  | X | Y | Z |
|                                       |   |   |   |

|   |              |              |              |
|---|--------------|--------------|--------------|
| O | -0.000001750 | 0.000000698  | 0.000000601  |
| C | 0.000001211  | -0.000001912 | 0.000003256  |
| C | 0.000000905  | 0.000000256  | -0.000000373 |
| C | 0.000000422  | -0.000000271 | 0.000000277  |
| N | 0.000000519  | 0.000000043  | 0.000000166  |
| C | 0.000000302  | 0.000000114  | -0.000000213 |
| C | -0.000000052 | 0.000000073  | -0.000000950 |
| C | 0.000000380  | -0.000000306 | 0.000000274  |
| C | 0.000000601  | -0.000000227 | 0.000000226  |
| C | 0.000000253  | -0.000000719 | -0.000000083 |
| C | -0.000000127 | -0.000000878 | 0.000000276  |
| C | 0.000000062  | 0.000000427  | 0.000000548  |
| C | -0.000000367 | 0.000000287  | -0.000000604 |
| C | -0.000001473 | -0.000000079 | 0.000002956  |
| C | -0.000000750 | -0.000000900 | -0.000000233 |
| O | -0.000001390 | 0.000000748  | -0.000001707 |
| C | 0.000000471  | 0.000000255  | 0.000000023  |
| C | 0.000005839  | 0.000001461  | 0.000000279  |
| O | -0.000001328 | 0.000001128  | -0.000003543 |
| H | 0.000000011  | -0.000001715 | -0.000000551 |
| H | -0.000000145 | 0.000000244  | -0.000000055 |
| H | -0.000000017 | 0.000000502  | 0.000000084  |
| H | 0.000000632  | 0.000000074  | 0.000000167  |
| H | 0.000000194  | -0.000000534 | -0.000000034 |
| H | 0.000000846  | -0.000000511 | 0.000000449  |
| H | 0.000000746  | -0.000000286 | 0.000000315  |
| H | 0.000000553  | 0.000000145  | 0.000000041  |
| H | 0.000000139  | 0.000000240  | 0.000000230  |
| H | 0.000000499  | 0.000000493  | 0.000000301  |
| H | 0.000000610  | 0.000000207  | 0.000000230  |
| H | -0.000000136 | -0.000000334 | -0.000000017 |
| H | -0.000000063 | -0.000000740 | -0.000000057 |
| H | 0.000000227  | -0.000001251 | -0.000000754 |
| C | 0.000000268  | 0.000001948  | 0.000001323  |
| H | -0.000000780 | 0.000000092  | -0.000000059 |
| H | -0.000000440 | -0.000000309 | -0.000000570 |
| H | 0.000000347  | 0.000000695  | -0.000000475 |
| C | -0.000000906 | 0.000000404  | 0.000000339  |
| C | -0.000000046 | 0.000000837  | 0.000003976  |
| C | -0.000000012 | -0.000002861 | 0.000001993  |
| H | -0.000000309 | 0.000000680  | 0.000000015  |
| H | -0.000000124 | 0.000000538  | -0.000000258 |
| H | -0.000001609 | 0.000000162  | -0.000000314 |
| H | -0.000000031 | -0.000000040 | -0.000000986 |
| H | -0.000000058 | 0.000000132  | 0.000000710  |
| H | 0.000000262  | 0.000002057  | 0.000003385  |
| H | 0.000000018  | 0.000001169  | -0.000000593 |
| H | 0.000000294  | -0.000001096 | 0.000001216  |
| H | 0.000000357  | 0.000000341  | 0.000000850  |

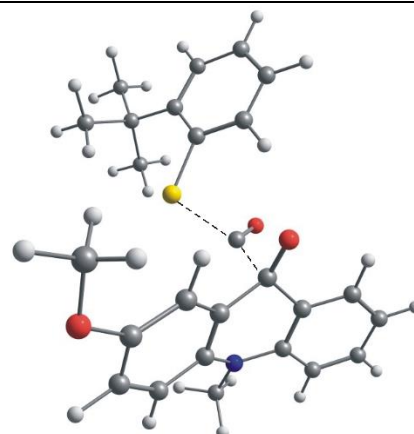

| CO <sub>2</sub> = -188.580938479 Ha |              |              |              |
|-------------------------------------|--------------|--------------|--------------|
| Atom                                | X            | Y            | Z            |
| C                                   | -0.000683228 | -0.000000000 | -0.000001192 |
| O                                   | 0.000341891  | 0.000000000  | -0.000158006 |
| O                                   | 0.000341337  | 0.000000000  | 0.000159199  |

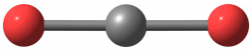

| Geom.No<br>H <sub>2</sub> O = -76.4197366208 Ha |              |              |              |
|-------------------------------------------------|--------------|--------------|--------------|
| Atom                                            | X            | Y            | Z            |
| O                                               | -0.000092754 | 0.000000000  | -0.000065587 |
| H                                               | 0.000031598  | 0.000000000  | 0.000053695  |
| H                                               | 0.000061157  | -0.000000000 | 0.000011892  |

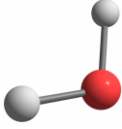

| Geom.No<br>OH <sup>-</sup> = -75.7262923857 Ha |             |             |              |
|------------------------------------------------|-------------|-------------|--------------|
| Atom                                           | X           | Y           | Z            |
| O                                              | 0.000000000 | 0.000000000 | 0.000008875  |
| H                                              | 0.000000000 | 0.000000000 | -0.000008875 |



| Geom.No<br>OOH <sup>-</sup> . |              |              |              |
|-------------------------------|--------------|--------------|--------------|
| Atom                          | X            | Y            | Z            |
| O                             | 0.000158315  | 0.000000000  | -0.000030230 |
| O                             | -0.000018291 | -0.000000000 | 0.000013673  |
| H                             | -0.000140024 | -0.000000000 | 0.000016557  |



Supplement: ijms-21-04417-s001.pdf [file ijms-21-04417-s001.pdf]
